# Supplementary material for: Resolving Transcriptional States and Predicting Lineages in the Annelid Capitella teleta Using Single-Cell RNAseq
Source: Frontiers journal article supplement (doi:10.3389/fevo.2020.618007), 2021-01-26
Supplement: Table_1.XLSX [file Table_1.XLSX]

## Sheet: Sheet1
Table S2: Feature annotations for each cluster identified in the complete aggregated dataset
Cluster_num	Cluster_identity	Gene_annotaion	p_val	avg_logFC	pct.1	pct.2	p_val_adj	Top_BLASTX_hit	Pfam
0	epidermal precursors	CapteG226289	4.67529e-149	0.559444	0.991	0.798	7.68149e-145	ALR_MOUSE^ALR_MOUSE^Q:55-492,H:48-198^52.32%ID^E:4e-54^RecName: Full=FAD-linked sulfhydryl oxidase ALR;^Eukaryota; Metazoa; Chordata; Craniata; Vertebrata; Euteleostomi; Mammalia; Eutheria; Euarchontoglires; Glires; Rodentia; Sciurognathi; Muroidea; Muridae; Murinae; Mus; Mus	PF04777.10^Evr1_Alr^Erv1 / Alr family^63-155^E:1e-27
0	epidermal precursors	CapteG115648	2.37845e-131	0.590432	0.945	0.761	3.90779e-127	YBOXH_APLCA^YBOXH_APLCA^Q:4-288,H:26-120^81.05%ID^E:1e-49^RecName: Full=Y-box factor homolog;^Eukaryota; Metazoa; Lophotrochozoa; Mollusca; Gastropoda; Heterobranchia; Euthyneura; Euopisthobranchia; Aplysiomorpha; Aplysioidea; Aplysiidae; Aplysia	PF00313.19^CSD^'Cold-shock' DNA-binding domain^9-77^E:4.8e-26
0	epidermal precursors	tRNA-Lys.37	5.78021e-69	0.580647	0.768	0.596	9.49689e-65
0	epidermal precursors	CapteG114717	4.54233e-33	0.574887	0.524	0.404	7.46304e-29	GATA_XENLA^GATA_XENLA^Q:1-1476,H:5-505^59.24%ID^E:0^RecName: Full=Glutamyl-tRNA(Gln) amidotransferase subunit A, mitochondrial {ECO:0000255|HAMAP-Rule:MF_03150};^Eukaryota; Metazoa; Chordata; Craniata; Vertebrata; Euteleostomi; Amphibia; Batrachia; Anura; Pipoidea; Pipidae; Xenopodinae; Xenopus; Xenopus	PF01425.18^Amidase^Amidase^19-474^E:4.6e-128
0	epidermal precursors	CapteG149232	3.20418e-66	0.557878	0.824	0.688	5.26447e-62	PEX12_HUMAN^PEX12_HUMAN^Q:152-1153,H:5-358^41.85%ID^E:3e-80^RecName: Full=Peroxisome assembly protein 12;^Eukaryota; Metazoa; Chordata; Craniata; Vertebrata; Euteleostomi; Mammalia; Eutheria; Euarchontoglires; Primates; Haplorrhini; Catarrhini; Hominidae; Homo	PF04757.11^Pex2_Pex12^Pex2 / Pex12 amino terminal region^26-251^E:5.8e-42
0	epidermal precursors	CapteG158431	0.00289856	0.543372	0.253	0.237	1	AATM_RAT^AATM_RAT^Q:116-1312,H:32-430^67.17%ID^E:0^RecName: Full=Aspartate aminotransferase, mitochondrial;^Eukaryota; Metazoa; Chordata; Craniata; Vertebrata; Euteleostomi; Mammalia; Eutheria; Euarchontoglires; Glires; Rodentia; Sciurognathi; Muroidea; Muridae; Murinae; Rattus	PF00155.18^Aminotran_1_2^Aminotransferase class I and II^58-424^E:1.8e-88
0	epidermal precursors	CapteG34265	6.99456e-126	0.543273	0.953	0.756	1.14921e-121	USH1G_HUMAN^USH1G_HUMAN^Q:1-1362,H:5-461^41.56%ID^E:2e-82^RecName: Full=Usher syndrome type-1G protein;^Eukaryota; Metazoa; Chordata; Craniata; Vertebrata; Euteleostomi; Mammalia; Eutheria; Euarchontoglires; Primates; Haplorrhini; Catarrhini; Hominidae; Homo	PF12796.4^Ank_2^Ankyrin repeats (3 copies)^1-87^E:3.5e-11`PF13637.3^Ank_4^Ankyrin repeats (many copies)^30-81^E:8.6e-11`PF12796.4^Ank_2^Ankyrin repeats (3 copies)^34-114^E:9.8e-13`PF13606.3^Ank_3^Ankyrin repeat^61-87^E:0.00027`PF00023.27^Ank^Ankyrin repeat^61-92^E:1.2e-05`PF00536.27^SAM_1^SAM domain (Sterile alpha motif)^385-438^E:2e-05
0	epidermal precursors	CapteG220753	1.83624e-71	0.535001	0.84	0.677	3.01694e-67	FAT4_MOUSE^FAT4_MOUSE^Q:5467-16218,H:80-3644^26.4%ID^E:3e-168^RecName: Full=Protocadherin Fat 4;^Eukaryota; Metazoa; Chordata; Craniata; Vertebrata; Euteleostomi; Mammalia; Eutheria; Euarchontoglires; Glires; Rodentia; Sciurognathi; Muroidea; Muridae; Murinae; Mus; Mus`FAT4_MOUSE^FAT4_MOUSE^Q:1225-12096,H:35-3638^25.68%ID^E:3e-167^RecName: Full=Protocadherin Fat 4;^Eukaryota; Metazoa; Chordata; C…	PF00028.14^Cadherin^Cadherin domain^154-257^E:3.3e-10`PF00028.14^Cadherin^Cadherin domain^298-383^E:5.2e-07`PF00028.14^Cadherin^Cadherin domain^514-609^E:9.8e-12`PF00028.14^Cadherin^Cadherin domain^623-710^E:6.9e-12`PF00028.14^Cadherin^Cadherin domain^725-811^E:2.5e-16`PF00028.14^Cadherin^Cadherin domain^826-913^E:3.3e-15`PF00028.14^Cadherin^Cadherin domain^934-1024^E:1.7e-12`PF00028.14^Cadherin^…
0	epidermal precursors	CapteG216053	2.77516e-132	0.532624	0.983	0.782	4.55959e-128	.	.
0	epidermal precursors	CapteG34879	4.91177e-80	0.532089	0.875	0.702	8.07004e-76	KLH20_PONAB^KLH20_PONAB^Q:1-1164,H:48-441^26.3%ID^E:1e-38^RecName: Full=Kelch-like protein 20;^Eukaryota; Metazoa; Chordata; Craniata; Vertebrata; Euteleostomi; Mammalia; Eutheria; Euarchontoglires; Primates; Haplorrhini; Catarrhini; Hominidae; Pongo	PF00651.28^BTB^BTB/POZ domain^12-116^E:3.5e-23`PF07707.12^BACK^BTB And C-terminal Kelch^124-224^E:4.9e-20`PF01344.22^Kelch_1^Kelch motif^315-352^E:2.2e-06`PF13964.3^Kelch_6^Kelch motif^316-355^E:8e-06
0	epidermal precursors	CapteG221164	1.66863e-25	0.53172	0.484	0.385	2.74156e-21	RPA49_HUMAN^RPA49_HUMAN^Q:55-1170,H:86-465^24.23%ID^E:4e-26^RecName: Full=DNA-directed RNA polymerase I subunit RPA49;^Eukaryota; Metazoa; Chordata; Craniata; Vertebrata; Euteleostomi; Mammalia; Eutheria; Euarchontoglires; Primates; Haplorrhini; Catarrhini; Hominidae; Homo	PF06870.9^RNA_pol_I_A49^A49-like RNA polymerase I associated factor^35-395^E:3.6e-64
0	epidermal precursors	CapteG151988	2.76176e-133	0.530305	0.983	0.782	4.53757e-129	CSK1_CAEEL^CSK1_CAEEL^Q:587-997,H:407-539^36.5%ID^E:6e-19^RecName: Full=Tyrosine-protein kinase csk-1 {ECO:0000305};^Eukaryota; Metazoa; Ecdysozoa; Nematoda; Chromadorea; Rhabditida; Rhabditoidea; Rhabditidae; Peloderinae; Caenorhabditis	PF00069.22^Pkinase^Protein kinase domain^96-263^E:1.5e-18`PF07714.14^Pkinase_Tyr^Protein tyrosine kinase^100-266^E:3.6e-28
0	epidermal precursors	CapteG58944	9.59709e-105	0.526042	0.949	0.762	1.5768e-100	.	.
0	epidermal precursors	CapteG103345	4.56045e-138	0.523747	0.988	0.792	7.49282e-134	KIF12_HUMAN^KIF12_HUMAN^Q:1-1107,H:30-396^45.24%ID^E:1e-98^RecName: Full=Kinesin-like protein KIF12;^Eukaryota; Metazoa; Chordata; Craniata; Vertebrata; Euteleostomi; Mammalia; Eutheria; Euarchontoglires; Primates; Haplorrhini; Catarrhini; Hominidae; Homo	PF00225.20^Kinesin^Kinesin motor domain^2-333^E:9e-98`PF16796.2^Microtub_bd^Microtubule binding^11-140^E:7.1e-25
0	epidermal precursors	CapteG206755	3.69373e-34	0.523196	0.602	0.499	6.0688e-30	.	PF05705.11^DUF829^Eukaryotic protein of unknown function (DUF829)^4-143^E:2.6e-10
0	epidermal precursors	CapteG226530	3.23188e-128	0.519599	0.977	0.772	5.30998e-124	.	PF00011.18^HSP20^Hsp20/alpha crystallin family^426-503^E:7.5e-09
0	epidermal precursors	CapteG152413	2.23277e-107	0.518746	0.963	0.776	3.66844e-103	AOSL_PLEHO^AOSL_PLEHO^Q:79-3066,H:64-1062^33.95%ID^E:1e-167^RecName: Full=Allene oxide synthase-lipoxygenase protein;^Eukaryota; Metazoa; Cnidaria; Anthozoa; Octocorallia; Alcyonacea; Holaxonia; Plexauridae; Plexaura	PF01477.20^PLAT^PLAT/LH2 domain^333-438^E:9.1e-12`PF00305.16^Lipoxygenase^Lipoxygenase^554-1003^E:1.5e-62
0	epidermal precursors	CapteG73417	1.06947e-108	0.518522	0.922	0.726	1.75714e-104	NCOR1_XENTR^NCOR1_XENTR^Q:94-1041,H:173-491^50.78%ID^E:2e-92^RecName: Full=Nuclear receptor corepressor 1;^Eukaryota; Metazoa; Chordata; Craniata; Vertebrata; Euteleostomi; Amphibia; Batrachia; Anura; Pipoidea; Pipidae; Xenopodinae; Xenopus; Silurana	PF15784.2^GPS2_interact^G-protein pathway suppressor 2-interacting domain^7-89^E:3.9e-24
0	epidermal precursors	CapteG205045	5.3438e-84	0.518045	0.896	0.728	8.77986e-80	.	.
0	epidermal precursors	CapteG163156	1.06666e-21	0.516413	0.442	0.349	1.75253e-17	PSF1_MOUSE^PSF1_MOUSE^Q:1-585,H:1-196^56.63%ID^E:5e-78^RecName: Full=DNA replication complex GINS protein PSF1;^Eukaryota; Metazoa; Chordata; Craniata; Vertebrata; Euteleostomi; Mammalia; Eutheria; Euarchontoglires; Glires; Rodentia; Sciurognathi; Muroidea; Muridae; Murinae; Mus; Mus	PF05916.8^Sld5^GINS complex protein^21-109^E:3.1e-06
0	epidermal precursors	CapteG170033	6.90049e-127	0.515879	0.987	0.797	1.13375e-122	FGRL1_CHICK^FGRL1_CHICK^Q:315-1358,H:16-352^46.86%ID^E:2e-95^RecName: Full=Fibroblast growth factor receptor-like 1;^Eukaryota; Metazoa; Chordata; Craniata; Vertebrata; Euteleostomi; Archelosauria; Archosauria; Dinosauria; Saurischia; Theropoda; Coelurosauria; Aves; Neognathae; Galloanserae; Galliformes; Phasianidae; Phasianinae; Gallus	PF13927.3^Ig_3^Immunoglobulin domain^24-100^E:3.4e-11`PF07679.13^I-set^Immunoglobulin I-set domain^36-109^E:1e-13`PF13895.3^Ig_2^Immunoglobulin domain^36-102^E:2.7e-08`PF00047.22^ig^Immunoglobulin domain^39-108^E:2.9e-06`PF07679.13^I-set^Immunoglobulin I-set domain^160-242^E:9.1e-13`PF13895.3^Ig_2^Immunoglobulin domain^163-243^E:3.7e-11`PF00047.22^ig^Immunoglobulin domain^163-234^E:1.3e-08`PF1392…
0	epidermal precursors	CapteG228981	5.79982e-108	0.512334	0.949	0.763	9.52911e-104	PTN23_MOUSE^PTN23_MOUSE^Q:28-2202,H:1-712^47.48%ID^E:0^RecName: Full=Tyrosine-protein phosphatase non-receptor type 23;^Eukaryota; Metazoa; Chordata; Craniata; Vertebrata; Euteleostomi; Mammalia; Eutheria; Euarchontoglires; Glires; Rodentia; Sciurognathi; Muroidea; Muridae; Murinae; Mus; Mus`PTN23_MOUSE^PTN23_MOUSE^Q:5392-6654,H:1157-1573^39.64%ID^E:1e-70^RecName: Full=Tyrosine-protein phosphatas…	PF03097.15^BRO1^BRO1-like domain^18-390^E:9.5e-116`PF13949.3^ALIX_LYPXL_bnd^ALIX V-shaped domain binding to HIV^425-727^E:8.2e-53`PF00102.24^Y_phosphatase^Protein-tyrosine phosphatase^1920-2150^E:1.2e-67
0	epidermal precursors	CapteG204361	3.10232e-20	0.508775	0.428	0.343	5.09711e-16	.	.
0	epidermal precursors	CapteG176202	1.41402e-123	0.50459	0.982	0.806	2.32324e-119	SDCB1_MOUSE^SDCB1_MOUSE^Q:197-1105,H:1-298^53.29%ID^E:1e-98^RecName: Full=Syntenin-1;^Eukaryota; Metazoa; Chordata; Craniata; Vertebrata; Euteleostomi; Mammalia; Eutheria; Euarchontoglires; Glires; Rodentia; Sciurognathi; Muroidea; Muridae; Murinae; Mus; Mus	PF00595.21^PDZ^PDZ domain (Also known as DHR or GLGF)^122-196^E:5.5e-11`PF13180.3^PDZ_2^PDZ domain^129-198^E:4.7e-09
0	epidermal precursors	CapteG209181	9.61371e-53	0.504468	0.674	0.498	1.57953e-48	.	.
0	epidermal precursors	CapteG205034	1.53087e-122	0.503179	0.979	0.787	2.51522e-118	.	.
0	epidermal precursors	CapteG105308	7.03119e-107	0.499049	0.957	0.749	1.15522e-102	FBXW9_BOVIN^FBXW9_BOVIN^Q:91-975,H:90-382^35.81%ID^E:4e-61^RecName: Full=F-box/WD repeat-containing protein 9;^Eukaryota; Metazoa; Chordata; Craniata; Vertebrata; Euteleostomi; Mammalia; Eutheria; Laurasiatheria; Cetartiodactyla; Ruminantia; Pecora; Bovidae; Bovinae; Bos	PF00646.30^F-box^F-box domain^20-65^E:2.7e-07`PF12937.4^F-box-like^F-box-like^23-62^E:1.8e-05
0	epidermal precursors	CapteG213418	3.96113e-100	0.498629	0.926	0.725	6.50813e-96	.	.
0	epidermal precursors	CapteG164759	1.10193e-129	0.495534	0.976	0.798	1.81047e-125	CAPSL_MOUSE^CAPSL_MOUSE^Q:10-588,H:14-206^62.69%ID^E:5e-74^RecName: Full=Calcyphosin-like protein;^Eukaryota; Metazoa; Chordata; Craniata; Vertebrata; Euteleostomi; Mammalia; Eutheria; Euarchontoglires; Glires; Rodentia; Sciurognathi; Muroidea; Muridae; Murinae; Mus; Mus	PF13499.3^EF-hand_7^EF-hand domain pair^35-93^E:1.9e-07`PF13833.3^EF-hand_8^EF-hand domain pair^47-93^E:4.9e-05`PF13405.3^EF-hand_6^EF-hand domain^70-94^E:1.9e-06`PF13499.3^EF-hand_7^EF-hand domain pair^70-129^E:1.3e-11`PF13202.3^EF-hand_5^EF hand^70-91^E:0.0001`PF00036.29^EF-hand_1^EF hand^71-94^E:2.1e-06`PF13202.3^EF-hand_5^EF hand^107-128^E:0.002`PF13833.3^EF-hand_8^EF-hand domain pair^117-173…
0	epidermal precursors	CapteG194950	9.7933e-126	0.494327	0.979	0.783	1.60904e-121	.	.
0	epidermal precursors	CapteG77906	2.14721e-93	0.493344	0.929	0.748	3.52786e-89	CHAO_TRICA^CHAO_TRICA^Q:7-210,H:273-340^42.65%ID^E:5e-10^RecName: Full=Chaoptin;^Eukaryota; Metazoa; Ecdysozoa; Arthropoda; Hexapoda; Insecta; Pterygota; Neoptera; Endopterygota; Coleoptera; Polyphaga; Cucujiformia; Tenebrionidae; Tenebrionidae incertae sedis; Tribolium	PF00560.30^LRR_1^Leucine Rich Repeat^3-23^E:0.35`PF13306.3^LRR_5^Leucine rich repeats (6 copies)^5-83^E:1.3e-12`PF13855.3^LRR_8^Leucine rich repeat^33-81^E:1.1e-10`PF13516.3^LRR_6^Leucine Rich repeat^48-67^E:0.064
0	epidermal precursors	tRNA-Leu.35	8.23924e-113	0.492435	0.978	0.784	1.35371e-108
0	epidermal precursors	CapteG48467	4.56407e-99	0.491762	0.892	0.674	7.49877e-95	H1D_STRPU^H1D_STRPU^Q:123-341,H:36-105^54.79%ID^E:4e-16^RecName: Full=Histone H1-delta;^Eukaryota; Metazoa; Echinodermata; Eleutherozoa; Echinozoa; Echinoidea; Euechinoidea; Echinacea; Echinoida; Strongylocentrotidae; Strongylocentrotus	PF00538.16^Linker_histone^linker histone H1 and H5 family^25-98^E:2.7e-27
0	epidermal precursors	CapteG202832	5.49912e-96	0.489371	0.935	0.753	9.03505e-92	.	.
0	epidermal precursors	CapteG130025	6.65035e-129	0.48819	0.992	0.797	1.09265e-124	HGF_HUMAN^HGF_HUMAN^Q:13-366,H:173-283^44.92%ID^E:8e-26^RecName: Full=Hepatocyte growth factor;^Eukaryota; Metazoa; Chordata; Craniata; Vertebrata; Euteleostomi; Mammalia; Eutheria; Euarchontoglires; Primates; Haplorrhini; Catarrhini; Hominidae; Homo`HGF_HUMAN^HGF_HUMAN^Q:4-384,H:253-383^38.85%ID^E:1e-20^RecName: Full=Hepatocyte growth factor;^Eukaryota; Metazoa; Chordata; Craniata; Vertebrata; E…	PF00051.15^Kringle^Kringle domain^5-38^E:1.5e-09`PF00051.15^Kringle^Kringle domain^46-128^E:1.5e-18
0	epidermal precursors	CapteG27724	8.80922e-103	0.487661	0.963	0.771	1.44735e-98	TONSL_DANRE^TONSL_DANRE^Q:1-312,H:519-622^60.58%ID^E:2e-38^RecName: Full=Tonsoku-like protein;^Eukaryota; Metazoa; Chordata; Craniata; Vertebrata; Euteleostomi; Actinopterygii; Neopterygii; Teleostei; Ostariophysi; Cypriniformes; Cyprinidae; Danio	PF13637.3^Ank_4^Ankyrin repeats (many copies)^7-58^E:1.7e-07`PF12796.4^Ank_2^Ankyrin repeats (3 copies)^9-104^E:9.3e-19`PF13857.3^Ank_5^Ankyrin repeats (many copies)^33-71^E:3.8e-06`PF13606.3^Ank_3^Ankyrin repeat^37-65^E:4.9e-08`PF00023.27^Ank^Ankyrin repeat^38-66^E:4.7e-07`PF13637.3^Ank_4^Ankyrin repeats (many copies)^52-94^E:5.2e-05`PF13857.3^Ank_5^Ankyrin repeats (many copies)^57-104^E:9.4e-10…
0	epidermal precursors	CapteG202489	1.50957e-11	0.486989	0.256	0.186	2.48023e-07	.	.
0	epidermal precursors	CapteG62994	2.1939e-18	0.485306	0.381	0.291	3.60457e-14	TPTE2_HUMAN^TPTE2_HUMAN^Q:379-1380,H:193-519^52.4%ID^E:1e-119^RecName: Full=Phosphatidylinositol 3,4,5-trisphosphate 3-phosphatase TPTE2;^Eukaryota; Metazoa; Chordata; Craniata; Vertebrata; Euteleostomi; Mammalia; Eutheria; Euarchontoglires; Primates; Haplorrhini; Catarrhini; Hominidae; Homo	PF00520.28^Ion_trans^Ion transport protein^14-119^E:7.5e-09`PF00782.17^DSPc^Dual specificity phosphatase, catalytic domain^174-299^E:2.7e-09`PF00102.24^Y_phosphatase^Protein-tyrosine phosphatase^191-267^E:0.00018`PF10409.6^PTEN_C2^C2 domain of PTEN tumour-suppressor protein^326-461^E:2.3e-22
0	epidermal precursors	CapteG222268	3.43274e-113	0.484481	0.971	0.775	5.63999e-109	.	.
0	epidermal precursors	CapteG154180	9.56816e-101	0.482673	0.949	0.765	1.57205e-96	PMGT1_RAT^PMGT1_RAT^Q:66-1904,H:40-642^61.26%ID^E:0^RecName: Full=Protein O-linked-mannose beta-1,2-N-acetylglucosaminyltransferase 1;^Eukaryota; Metazoa; Chordata; Craniata; Vertebrata; Euteleostomi; Mammalia; Eutheria; Euarchontoglires; Glires; Rodentia; Sciurognathi; Muroidea; Muridae; Murinae; Rattus	PF15711.2^ILEI^Interleukin-like EMT inducer^114-203^E:3e-26`PF03071.12^GNT-I^GNT-I family^352-599^E:7.1e-50
0	epidermal precursors	CapteG108125	9.32701e-106	0.481132	0.967	0.783	1.53243e-101	OAR_BOMMO^OAR_BOMMO^Q:1-1062,H:88-478^31%ID^E:1e-50^RecName: Full=Octopamine receptor;^Eukaryota; Metazoa; Ecdysozoa; Arthropoda; Hexapoda; Insecta; Pterygota; Neoptera; Endopterygota; Lepidoptera; Glossata; Ditrysia; Bombycoidea; Bombycidae; Bombycinae; Bombyx	PF00001.18^7tm_1^7 transmembrane receptor (rhodopsin family)^2-336^E:7.1e-59
0	epidermal precursors	CapteG197657	1.14511e-100	0.480844	0.95	0.758	1.88141e-96	.	.
0	epidermal precursors	CapteG146391	4.04763e-101	0.480657	0.945	0.754	6.65026e-97	MCMBP_XENLA^MCMBP_XENLA^Q:1-1866,H:1-615^44.43%ID^E:3e-171^RecName: Full=Mini-chromosome maintenance complex-binding protein;^Eukaryota; Metazoa; Chordata; Craniata; Vertebrata; Euteleostomi; Amphibia; Batrachia; Anura; Pipoidea; Pipidae; Xenopodinae; Xenopus; Xenopus	PF09739.6^MCM_bind^Mini-chromosome maintenance replisome factor^35-622^E:3.3e-194
0	epidermal precursors	CapteG225862	2.20657e-81	0.480425	0.874	0.697	3.6254e-77	.	.
0	epidermal precursors	CapteG168421	1.6964e-15	0.479964	0.379	0.307	2.78719e-11	TM256_BUFGR^TM256_BUFGR^Q:216-548,H:4-114^56.76%ID^E:1e-25^RecName: Full=Transmembrane protein 256 homolog;^Eukaryota; Metazoa; Chordata; Craniata; Vertebrata; Euteleostomi; Amphibia; Batrachia; Anura; Neobatrachia; Hyloidea; Bufonidae; Bufo	PF04241.12^DUF423^Protein of unknown function (DUF423)^59-140^E:1.4e-22
0	epidermal precursors	CapteG216497	4.64981e-48	0.477898	0.705	0.552	7.63964e-44	.	.
0	epidermal precursors	CapteG74696	3.47652e-110	0.477814	0.969	0.781	5.71192e-106	PMYT1_XENLA^PMYT1_XENLA^Q:55-912,H:64-351^50.34%ID^E:2e-93^RecName: Full=Membrane-associated tyrosine- and threonine-specific cdc2-inhibitory kinase;^Eukaryota; Metazoa; Chordata; Craniata; Vertebrata; Euteleostomi; Amphibia; Batrachia; Anura; Pipoidea; Pipidae; Xenopodinae; Xenopus; Xenopus	PF00069.22^Pkinase^Protein kinase domain^57-304^E:5.5e-53`PF07714.14^Pkinase_Tyr^Protein tyrosine kinase^57-302^E:1.4e-30
0	epidermal precursors	CapteG196808	1.67548e-14	0.477741	0.319	0.241	2.75281e-10	FGOP2_PONAB^FGOP2_PONAB^Q:10-606,H:1-200^53%ID^E:9e-64^RecName: Full=FGFR1 oncogene partner 2 homolog;^Eukaryota; Metazoa; Chordata; Craniata; Vertebrata; Euteleostomi; Mammalia; Eutheria; Euarchontoglires; Primates; Haplorrhini; Catarrhini; Hominidae; Pongo	PF05769.8^DUF837^Protein of unknown function (DUF837)^5-185^E:1.1e-64
0	epidermal precursors	CapteG70794	2.1143e-120	0.477301	0.975	0.772	3.47379e-116	GLR1_CAEEL^GLR1_CAEEL^Q:1-201,H:659-725^43.28%ID^E:2e-12^RecName: Full=Glutamate receptor 1 {ECO:0000312|WormBase:C06E1.4};^Eukaryota; Metazoa; Ecdysozoa; Nematoda; Chromadorea; Rhabditida; Rhabditoidea; Rhabditidae; Peloderinae; Caenorhabditis	PF00060.23^Lig_chan^Ligand-gated ion channel^1-50^E:8.3e-12
0	epidermal precursors	CapteG201458	5.48368e-113	0.475684	0.965	0.766	9.00969e-109	.	.
0	epidermal precursors	CapteG204434	1.31631e-99	0.475202	0.963	0.772	2.1627e-95	AGT2_BOVIN^AGT2_BOVIN^Q:1-1380,H:48-505^58.26%ID^E:0^RecName: Full=Alanine--glyoxylate aminotransferase 2, mitochondrial;^Eukaryota; Metazoa; Chordata; Craniata; Vertebrata; Euteleostomi; Mammalia; Eutheria; Laurasiatheria; Cetartiodactyla; Ruminantia; Pecora; Bovidae; Bovinae; Bos	PF00202.18^Aminotran_3^Aminotransferase class-III^39-460^E:6.2e-94
0	epidermal precursors	CapteG205047	1.46221e-103	0.474616	0.954	0.769	2.40241e-99	DCSG_STRLA^DCSG_STRLA^Q:289-1071,H:31-298^30.22%ID^E:3e-23^RecName: Full=Cycloserine biosynthesis protein DcsG;^Bacteria; Actinobacteria; Streptomycetales; Streptomycetaceae; Streptomyces	.
0	epidermal precursors	CapteG158442	6.78506e-108	0.474033	0.972	0.78	1.11479e-103	SSUH2_HUMAN^SSUH2_HUMAN^Q:403-1362,H:37-353^36.53%ID^E:1e-68^RecName: Full=Protein SSUH2 homolog;^Eukaryota; Metazoa; Chordata; Craniata; Vertebrata; Euteleostomi; Mammalia; Eutheria; Euarchontoglires; Primates; Haplorrhini; Catarrhini; Hominidae; Homo	.
0	epidermal precursors	CapteG155965	4.86789e-78	0.473643	0.888	0.728	7.99794e-74	PPIH_HUMAN^PPIH_HUMAN^Q:52-570,H:5-177^76.88%ID^E:3e-99^RecName: Full=Peptidyl-prolyl cis-trans isomerase H;^Eukaryota; Metazoa; Chordata; Craniata; Vertebrata; Euteleostomi; Mammalia; Eutheria; Euarchontoglires; Primates; Haplorrhini; Catarrhini; Hominidae; Homo	PF00160.18^Pro_isomerase^Cyclophilin type peptidyl-prolyl cis-trans isomerase/CLD^20-173^E:1.6e-48
0	epidermal precursors	CapteG201604	3.95512e-90	0.471709	0.933	0.742	6.49826e-86	RDH13_HUMAN^RDH13_HUMAN^Q:46-879,H:11-285^48.08%ID^E:3e-61^RecName: Full=Retinol dehydrogenase 13;^Eukaryota; Metazoa; Chordata; Craniata; Vertebrata; Euteleostomi; Mammalia; Eutheria; Euarchontoglires; Primates; Haplorrhini; Catarrhini; Hominidae; Homo	PF00106.22^adh_short^short chain dehydrogenase^50-251^E:2.4e-34`PF08659.7^KR^KR domain^51-141^E:6.7e-09`PF13561.3^adh_short_C2^Enoyl-(Acyl carrier protein) reductase^56-251^E:1.3e-20
0	epidermal precursors	CapteG203966	2.16104e-90	0.4716	0.908	0.723	3.55059e-86	RNF26_MOUSE^RNF26_MOUSE^Q:1063-1314,H:337-424^37.08%ID^E:7e-10^RecName: Full=Ring finger protein 26;^Eukaryota; Metazoa; Chordata; Craniata; Vertebrata; Euteleostomi; Mammalia; Eutheria; Euarchontoglires; Glires; Rodentia; Sciurognathi; Muroidea; Muridae; Murinae; Mus; Mus	PF13920.3^zf-C3HC4_3^Zinc finger, C3HC4 type (RING finger)^381-433^E:5.4e-14
0	epidermal precursors	CapteG131091	1.95545e-103	0.471538	0.957	0.767	3.2128e-99	KLF9_HUMAN^KLF9_HUMAN^Q:19-309,H:138-234^75.26%ID^E:6e-47^RecName: Full=Krueppel-like factor 9;^Eukaryota; Metazoa; Chordata; Craniata; Vertebrata; Euteleostomi; Mammalia; Eutheria; Euarchontoglires; Primates; Haplorrhini; Catarrhini; Hominidae; Homo	PF00096.23^zf-C2H2^Zinc finger, C2H2 type^42-66^E:2.9e-05`PF00096.23^zf-C2H2^Zinc finger, C2H2 type^72-94^E:2e-05`PF13894.3^zf-C2H2_4^C2H2-type zinc finger^72-94^E:6.7e-05`PF13912.3^zf-C2H2_6^C2H2-type zinc finger^72-95^E:0.00059`PF12874.4^zf-met^Zinc-finger of C2H2 type^72-91^E:0.037
0	epidermal precursors	CapteG93883	2.62682e-16	0.471532	0.393	0.319	4.31587e-12	OPN4_BRABE^OPN4_BRABE^Q:31-909,H:80-381^26.69%ID^E:3e-18^RecName: Full=Melanopsin;^Eukaryota; Metazoa; Chordata; Cephalochordata; Branchiostomidae; Branchiostoma	PF10328.6^7TM_GPCR_Srx^Serpentine type 7TM GPCR chemoreceptor Srx^24-214^E:2.7e-06`PF10320.6^7TM_GPCR_Srsx^Serpentine type 7TM GPCR chemoreceptor Srsx^27-305^E:1.2e-12`PF00001.18^7tm_1^7 transmembrane receptor (rhodopsin family)^32-290^E:2.7e-35
0	epidermal precursors	CapteG163094	3.58296e-102	0.470891	0.955	0.762	5.88681e-98	FBX28_BOVIN^FBX28_BOVIN^Q:34-831,H:61-324^45.15%ID^E:2e-68^RecName: Full=F-box only protein 28;^Eukaryota; Metazoa; Chordata; Craniata; Vertebrata; Euteleostomi; Mammalia; Eutheria; Laurasiatheria; Cetartiodactyla; Ruminantia; Pecora; Bovidae; Bovinae; Bos	PF00646.30^F-box^F-box domain^9-36^E:3.5e-05
0	epidermal precursors	CapteG149044	1.72023e-18	0.469828	0.38	0.289	2.82633e-14	DJC12_HUMAN^DJC12_HUMAN^Q:1-444,H:1-198^36.87%ID^E:4e-28^RecName: Full=DnaJ homolog subfamily C member 12;^Eukaryota; Metazoa; Chordata; Craniata; Vertebrata; Euteleostomi; Mammalia; Eutheria; Euarchontoglires; Primates; Haplorrhini; Catarrhini; Hominidae; Homo	PF00226.28^DnaJ^DnaJ domain^13-74^E:1.4e-18
0	epidermal precursors	CapteG44911	4.66642e-114	0.469382	0.971	0.788	7.66693e-110	ACSA_ALKEH^ACSA_ALKEH^Q:1-1065,H:109-463^74.65%ID^E:0^RecName: Full=Acetyl-coenzyme A synthetase {ECO:0000255|HAMAP-Rule:MF_01123};^Bacteria; Proteobacteria; Gammaproteobacteria; Chromatiales; Ectothiorhodospiraceae; Alkalilimnicola	PF00501.25^AMP-binding^AMP-binding enzyme^1-355^E:3.4e-73
0	epidermal precursors	CapteG220596	3.47424e-34	0.468617	0.59	0.479	5.70817e-30	CSMD3_HUMAN^CSMD3_HUMAN^Q:76-1359,H:3002-3434^32.59%ID^E:3e-49^RecName: Full=CUB and sushi domain-containing protein 3;^Eukaryota; Metazoa; Chordata; Craniata; Vertebrata; Euteleostomi; Mammalia; Eutheria; Euarchontoglires; Primates; Haplorrhini; Catarrhini; Hominidae; Homo`CSMD3_HUMAN^CSMD3_HUMAN^Q:67-963,H:2933-3234^37.01%ID^E:8e-46^RecName: Full=CUB and sushi domain-containing protein 3;^Eukar…	PF00084.17^Sushi^Sushi repeat (SCR repeat)^23-78^E:7.2e-13`PF00084.17^Sushi^Sushi repeat (SCR repeat)^83-136^E:8.1e-11`PF00084.17^Sushi^Sushi repeat (SCR repeat)^141-194^E:3.9e-09`PF00084.17^Sushi^Sushi repeat (SCR repeat)^217-259^E:1.1e-05`PF00084.17^Sushi^Sushi repeat (SCR repeat)^264-317^E:1.9e-10`PF07699.10^Ephrin_rec_like^Putative ephrin-receptor like^315-355^E:1.4e-08`PF00084.17^Sushi^Sushi…
0	epidermal precursors	CapteG219721	1.06338e-120	0.468219	0.979	0.792	1.74713e-116	.	.
0	epidermal precursors	CapteG207754	8.08529e-35	0.467928	0.621	0.504	1.32841e-30	.	.
0	epidermal precursors	CapteG189399	2.22214e-22	0.467307	0.47	0.368	3.65098e-18	.	.
0	epidermal precursors	CapteG170070	4.1141e-19	0.465944	0.464	0.379	6.75947e-15	TRI37_MOUSE^TRI37_MOUSE^Q:1-1425,H:5-462^72%ID^E:0^RecName: Full=E3 ubiquitin-protein ligase TRIM37 {ECO:0000305};^Eukaryota; Metazoa; Chordata; Craniata; Vertebrata; Euteleostomi; Mammalia; Eutheria; Euarchontoglires; Glires; Rodentia; Sciurognathi; Muroidea; Muridae; Murinae; Mus; Mus	PF00643.21^zf-B_box^B-box zinc finger^77-116^E:4.2e-05`PF00917.23^MATH^MATH domain^269-382^E:1.3e-06
0	epidermal precursors	CapteG200625	3.71563e-61	0.465423	0.818	0.663	6.10479e-57	.	PF00656.19^Peptidase_C14^Caspase domain^71-148^E:1.7e-06
0	epidermal precursors	CapteG227712	2.66993e-82	0.465076	0.883	0.698	4.3867e-78	SLIT2_MOUSE^SLIT2_MOUSE^Q:799-1023,H:886-956^36%ID^E:6e-06^RecName: Full=Slit homolog 2 protein;^Eukaryota; Metazoa; Chordata; Craniata; Vertebrata; Euteleostomi; Mammalia; Eutheria; Euarchontoglires; Glires; Rodentia; Sciurognathi; Muroidea; Muridae; Murinae; Mus; Mus	PF00008.24^EGF^EGF-like domain^295-325^E:9.6e-07`PF12661.4^hEGF^Human growth factor-like EGF^315-327^E:0.051
1	unknown	CapteG227487	0	0.598445	1	0.81	0	DTA_ARTSP^DTA_ARTSP^Q:93-1007,H:18-319^39.48%ID^E:9e-54^RecName: Full=D-threonine aldolase {ECO:0000303|PubMed:9346293, ECO:0000303|PubMed:9642221};^Bacteria; Actinobacteria; Micrococcales; Micrococcaceae; Arthrobacter`DTA_ARTSP^DTA_ARTSP^Q:969-1811,H:102-376^38.6%ID^E:9e-46^RecName: Full=D-threonine aldolase {ECO:0000303|PubMed:9346293, ECO:0000303|PubMed:9642221};^Bacteria; Actinobacteria; Micr…	PF01168.17^Ala_racemase_N^Alanine racemase, N-terminal domain^33-260^E:5.2e-25`PF01168.17^Ala_racemase_N^Alanine racemase, N-terminal domain^316-466^E:1.8e-14`PF14031.3^D-ser_dehydrat^Putative serine dehydratase domain^485-574^E:2.5e-18
1	unknown	CapteG212986	1.43e-300	0.582633	1	0.81	2.35e-296	RGXT3_ARATH^RGXT3_ARATH^Q:205-1065,H:71-373^25.08%ID^E:2e-12^RecName: Full=UDP-D-xylose:L-fucose alpha-1,3-D-xylosyltransferase 3 {ECO:0000305};^Eukaryota; Viridiplantae; Streptophyta; Embryophyta; Tracheophyta; Spermatophyta; Magnoliophyta; eudicotyledons; Gunneridae; Pentapetalae; rosids; malvids; Brassicales; Brassicaceae; Camelineae; Arabidopsis	PF03407.13^Nucleotid_trans^Nucleotide-diphospho-sugar transferase^111-313^E:4e-28
1	unknown	CapteG217221	2.16e-163	0.577278	0.987	0.719	3.55e-159	.	PF01607.21^CBM_14^Chitin binding Peritrophin-A domain^221-273^E:4.4e-11`PF01607.21^CBM_14^Chitin binding Peritrophin-A domain^508-556^E:5.1e-11
1	unknown	CapteG155778	0	0.556577	1	0.826	0	TS101_HUMAN^TS101_HUMAN^Q:149-1387,H:1-389^50.36%ID^E:2e-135^RecName: Full=Tumor susceptibility gene 101 protein;^Eukaryota; Metazoa; Chordata; Craniata; Vertebrata; Euteleostomi; Mammalia; Eutheria; Euarchontoglires; Primates; Haplorrhini; Catarrhini; Hominidae; Homo	PF05743.10^UEV^UEV domain^22-141^E:3.4e-45`PF09454.7^Vps23_core^Vps23 core domain^340-403^E:9.5e-26
1	unknown	CapteG199442	0	0.556217	1	0.81	0	POLR_DROME^POLR_DROME^Q:606-268,H:446-558^28.32%ID^E:4e-10^RecName: Full=Retrovirus-related Pol polyprotein from type-2 retrotransposable element R2DM;^Eukaryota; Metazoa; Ecdysozoa; Arthropoda; Hexapoda; Insecta; Pterygota; Neoptera; Endopterygota; Diptera; Brachycera; Muscomorpha; Ephydroidea; Drosophilidae; Drosophila; Sophophora	.
1	unknown	CapteG48911	0	0.550345	1	0.81	0	RTJK_DROME^RTJK_DROME^Q:1-243,H:455-536^34.15%ID^E:2e-07^RecName: Full=RNA-directed DNA polymerase from mobile element jockey;^Eukaryota; Metazoa; Ecdysozoa; Arthropoda; Hexapoda; Insecta; Pterygota; Neoptera; Endopterygota; Diptera; Brachycera; Muscomorpha; Ephydroidea; Drosophilidae; Drosophila; Sophophora	.
1	unknown	CapteG223376	1.55e-119	0.538235	0.926	0.575	2.54e-115	.	.
1	unknown	CapteG217220	4.88e-184	0.535937	0.997	0.787	8.01e-180	.	PF03045.12^DAN^DAN domain^49-137^E:4.7e-06`PF00007.19^Cys_knot^Cystine-knot domain^68-150^E:5.6e-06
1	unknown	CapteG169961	4.76e-90	0.487651	0.814	0.44	7.82e-86	VPS51_DANRE^VPS51_DANRE^Q:13-2247,H:16-827^59.73%ID^E:0^RecName: Full=Vacuolar protein sorting-associated protein 51 homolog;^Eukaryota; Metazoa; Chordata; Craniata; Vertebrata; Euteleostomi; Actinopterygii; Neopterygii; Teleostei; Ostariophysi; Cypriniformes; Cyprinidae; Danio	PF08700.8^Vps51^Vps51/Vps67^36-120^E:1.6e-24`PF10475.6^Vps54_N^Vacuolar-sorting protein 54, of GARP complex^46-214^E:4.9e-10`PF04124.9^Dor1^Dor1-like family^53-214^E:2.3e-11`PF15469.3^Sec5^Exocyst complex component Sec5^74-235^E:1.2e-19
2	neural + ciliary-bands	CapteG158616	5.55e-301	1.41699	0.376	0.001	9.12e-297	ATPA_PONAB^ATPA_PONAB^Q:112-1710,H:21-552^85.37%ID^E:0^RecName: Full=ATP synthase subunit alpha, mitochondrial;^Eukaryota; Metazoa; Chordata; Craniata; Vertebrata; Euteleostomi; Mammalia; Eutheria; Euarchontoglires; Primates; Haplorrhini; Catarrhini; Hominidae; Pongo	PF02874.20^ATP-synt_ab_N^ATP synthase alpha/beta family, beta-barrel domain^70-136^E:6e-18`PF00006.22^ATP-synt_ab^ATP synthase alpha/beta family, nucleotide-binding domain^193-416^E:1.1e-73`PF00306.24^ATP-synt_ab_C^ATP synthase alpha/beta chain, C terminal domain^423-548^E:1.5e-45
2	neural + ciliary-bands	CapteG156804	1.85e-299	1.31973	0.369	0	3.04e-295	RUXG_DROME^RUXG_DROME^Q:60-287,H:1-76^73.68%ID^E:5e-37^RecName: Full=Probable small nuclear ribonucleoprotein G;^Eukaryota; Metazoa; Ecdysozoa; Arthropoda; Hexapoda; Insecta; Pterygota; Neoptera; Endopterygota; Diptera; Brachycera; Muscomorpha; Ephydroidea; Drosophilidae; Drosophila; Sophophora	PF01423.19^LSM^LSM domain^8-70^E:3e-22
2	neural + ciliary-bands	CapteG21877	1.03e-297	1.36117	0.367	0	1.69e-293	CALR_MOUSE^CALR_MOUSE^Q:71-1117,H:2-351^74.36%ID^E:9e-169^RecName: Full=Calreticulin;^Eukaryota; Metazoa; Chordata; Craniata; Vertebrata; Euteleostomi; Mammalia; Eutheria; Euarchontoglires; Glires; Rodentia; Sciurognathi; Muroidea; Muridae; Murinae; Mus; Mus	PF00262.15^Calreticulin^Calreticulin family^22-255^E:1.5e-58`PF00262.15^Calreticulin^Calreticulin family^257-329^E:1.2e-22
2	neural + ciliary-bands	CapteG158856	1.03e-297	1.34081	0.367	0	1.69e-293	NH2L1_XENLA^NH2L1_XENLA^Q:93-476,H:1-128^85.16%ID^E:9e-65^RecName: Full=NHP2-like protein 1;^Eukaryota; Metazoa; Chordata; Craniata; Vertebrata; Euteleostomi; Amphibia; Batrachia; Anura; Pipoidea; Pipidae; Xenopodinae; Xenopus; Xenopus	PF01248.23^Ribosomal_L7Ae^Ribosomal protein L7Ae/L30e/S12e/Gadd45 family^22-110^E:4.1e-26
2	neural + ciliary-bands	CapteG166603	1.74e-292	1.36542	0.361	0	2.85e-288	YBOXH_APLCA^YBOXH_APLCA^Q:91-423,H:10-120^84.68%ID^E:9e-54^RecName: Full=Y-box factor homolog;^Eukaryota; Metazoa; Lophotrochozoa; Mollusca; Gastropoda; Heterobranchia; Euthyneura; Euopisthobranchia; Aplysiomorpha; Aplysioidea; Aplysiidae; Aplysia	PF00313.19^CSD^'Cold-shock' DNA-binding domain^24-92^E:2.1e-27
2	neural + ciliary-bands	CapteG162674	1.74e-292	1.29952	0.361	0	2.85e-288	SMD1_MOUSE^SMD1_MOUSE^Q:70-273,H:1-68^89.71%ID^E:2e-35^RecName: Full=Small nuclear ribonucleoprotein Sm D1;^Eukaryota; Metazoa; Chordata; Craniata; Vertebrata; Euteleostomi; Mammalia; Eutheria; Euarchontoglires; Glires; Rodentia; Sciurognathi; Muroidea; Muridae; Murinae; Mus; Mus	PF01423.19^LSM^LSM domain^5-68^E:4e-18
2	neural + ciliary-bands	CapteG220209	8.18e-289	1.3607	0.359	0	1.34e-284	FKBP4_SPOFR^FKBP4_SPOFR^Q:75-344,H:1-90^53.33%ID^E:4e-24^RecName: Full=46 kDa FK506-binding nuclear protein;^Eukaryota; Metazoa; Ecdysozoa; Arthropoda; Hexapoda; Insecta; Pterygota; Neoptera; Endopterygota; Lepidoptera; Glossata; Ditrysia; Noctuoidea; Noctuidae; Amphipyrinae; Spodoptera	.
2	neural + ciliary-bands	CapteG181476	2.89e-287	1.25246	0.355	0	4.75e-283	ATP5L_RAT^ATP5L_RAT^Q:89-379,H:8-103^42.27%ID^E:6e-22^RecName: Full=ATP synthase subunit g, mitochondrial;^Eukaryota; Metazoa; Chordata; Craniata; Vertebrata; Euteleostomi; Mammalia; Eutheria; Euarchontoglires; Glires; Rodentia; Sciurognathi; Muroidea; Muridae; Murinae; Rattus	PF04718.12^ATP-synt_G^Mitochondrial ATP synthase g subunit^15-105^E:9.9e-18
2	neural + ciliary-bands	CapteG153047	1.58e-285	1.33145	0.353	0	2.6e-281	TBB_PARLI^TBB_PARLI^Q:107-1330,H:19-426^99.26%ID^E:0^RecName: Full=Tubulin beta chain;^Eukaryota; Metazoa; Echinodermata; Eleutherozoa; Echinozoa; Echinoidea; Euechinoidea; Echinacea; Echinoida; Echinidae; Paracentrotus	PF00091.22^Tubulin^Tubulin/FtsZ family, GTPase domain^7-139^E:5.3e-45`PF03953.14^Tubulin_C^Tubulin C-terminal domain^189-309^E:4.4e-44
2	neural + ciliary-bands	CapteG158220	8.66e-284	1.28111	0.351	0	1.42e-279	HMG2_DROME^HMG2_DROME^Q:134-625,H:174-344^61.99%ID^E:3e-63^RecName: Full=High mobility group protein DSP1;^Eukaryota; Metazoa; Ecdysozoa; Arthropoda; Hexapoda; Insecta; Pterygota; Neoptera; Endopterygota; Diptera; Brachycera; Muscomorpha; Ephydroidea; Drosophilidae; Drosophila; Sophophora	PF09011.7^HMG_box_2^HMG-box domain^6-77^E:1.1e-23`PF00505.16^HMG_box^HMG (high mobility group) box^12-77^E:5.2e-17`PF09011.7^HMG_box_2^HMG-box domain^92-160^E:9e-13`PF00505.16^HMG_box^HMG (high mobility group) box^95-161^E:3.4e-17
2	neural + ciliary-bands	CapteG165495	4.72e-282	1.21841	0.349	0	7.76e-278	CATL_SARPE^CATL_SARPE^Q:210-1133,H:28-339^62.94%ID^E:2e-138^RecName: Full=Cathepsin L;^Eukaryota; Metazoa; Ecdysozoa; Arthropoda; Hexapoda; Insecta; Pterygota; Neoptera; Endopterygota; Diptera; Brachycera; Muscomorpha; Oestroidea; Sarcophagidae; Sarcophaga; Boettcherisca	PF08246.9^Inhibitor_I29^Cathepsin propeptide inhibitor domain (I29)^44-103^E:1.3e-11`PF00112.20^Peptidase_C1^Papain family cysteine protease^135-349^E:1.1e-88
2	neural + ciliary-bands	CapteG21987	2.57e-280	1.26379	0.346	0	4.23e-276	SDHB_DANRE^SDHB_DANRE^Q:111-818,H:37-270^80.93%ID^E:2e-141^RecName: Full=Succinate dehydrogenase [ubiquinone] iron-sulfur subunit, mitochondrial;^Eukaryota; Metazoa; Chordata; Craniata; Vertebrata; Euteleostomi; Actinopterygii; Neopterygii; Teleostei; Ostariophysi; Cypriniformes; Cyprinidae; Danio	PF13085.3^Fer2_3^2Fe-2S iron-sulfur cluster binding domain^2-77^E:4.4e-27`PF00111.24^Fer2^2Fe-2S iron-sulfur cluster binding domain^17-41^E:0.0028`PF13183.3^Fer4_8^4Fe-4S dicluster domain^115-188^E:1.1e-07`PF13534.3^Fer4_17^4Fe-4S dicluster domain^117-190^E:5.1e-10`PF13237.3^Fer4_10^4Fe-4S dicluster domain^117-186^E:4.7e-07
2	neural + ciliary-bands	CapteG151544	2.57e-280	1.1971	0.346	0	4.23e-276	PRP8_MOUSE^PRP8_MOUSE^Q:4-7041,H:13-2335^91.06%ID^E:0^RecName: Full=Pre-mRNA-processing-splicing factor 8;^Eukaryota; Metazoa; Chordata; Craniata; Vertebrata; Euteleostomi; Mammalia; Eutheria; Euarchontoglires; Glires; Rodentia; Sciurognathi; Muroidea; Muridae; Murinae; Mus; Mus	PF08082.8^PRO8NT^PRO8NT (NUC069), PrP8 N-terminal domain^44-195^E:9.1e-85`PF08083.8^PROCN^PROCN (NUC071) domain^382-808^E:1.5e-231`PF10598.6^RRM_4^RNA recognition motif of the spliceosomal PrP8^993-1083^E:1.8e-47`PF10597.6^U5_2-snRNA_bdg^U5-snRNA binding site 2 of PrP8^1217-1350^E:7.4e-74`PF10596.6^U6-snRNA_bdg^U6-snRNA interacting domain of PrP8^1449-1607^E:2.9e-92`PF12134.5^PRP8_domainIV^PRP8 d…
2	neural + ciliary-bands	CapteG167027	5.81e-275	1.31212	0.342	0	9.54e-271	SPTCA_DROME^SPTCA_DROME^Q:22-7242,H:6-2415^68.01%ID^E:0^RecName: Full=Spectrin alpha chain;^Eukaryota; Metazoa; Ecdysozoa; Arthropoda; Hexapoda; Insecta; Pterygota; Neoptera; Endopterygota; Diptera; Brachycera; Muscomorpha; Ephydroidea; Drosophilidae; Drosophila; Sophophora	PF00435.18^Spectrin^Spectrin repeat^53-152^E:2.2e-21`PF00435.18^Spectrin^Spectrin repeat^158-256^E:3.8e-22`PF00435.18^Spectrin^Spectrin repeat^260-363^E:3.8e-24`PF00435.18^Spectrin^Spectrin repeat^366-466^E:3.7e-17`PF00435.18^Spectrin^Spectrin repeat^473-576^E:2.5e-23`PF00435.18^Spectrin^Spectrin repeat^578-680^E:2.2e-21`PF00435.18^Spectrin^Spectrin repeat^684-786^E:1.2e-22`PF00435.18^Spectrin^Sp…
2	neural + ciliary-bands	CapteG18512	4.11e-275	1.41105	0.34	0	6.75e-271	GRP78_CHICK^GRP78_CHICK^Q:184-2058,H:22-643^84.96%ID^E:0^RecName: Full=78 kDa glucose-regulated protein;^Eukaryota; Metazoa; Chordata; Craniata; Vertebrata; Euteleostomi; Archelosauria; Archosauria; Dinosauria; Saurischia; Theropoda; Coelurosauria; Aves; Neognathae; Galloanserae; Galliformes; Phasianidae; Phasianinae; Gallus	PF00012.17^HSP70^Hsp70 protein^33-639^E:5.3e-265`PF06723.10^MreB_Mbl^MreB/Mbl protein^151-402^E:1.4e-18
2	neural + ciliary-bands	CapteG152656	2.22e-273	1.26908	0.338	0	3.65e-269	PA2G4_RAT^PA2G4_RAT^Q:84-1166,H:1-362^65.19%ID^E:3e-159^RecName: Full=Proliferation-associated protein 2G4;^Eukaryota; Metazoa; Chordata; Craniata; Vertebrata; Euteleostomi; Mammalia; Eutheria; Euarchontoglires; Glires; Rodentia; Sciurognathi; Muroidea; Muridae; Murinae; Rattus	PF00557.21^Peptidase_M24^Metallopeptidase family M24^20-226^E:2.1e-21
2	neural + ciliary-bands	CapteG165566	2.22e-273	1.22502	0.338	0	3.65e-269	RSMB_MOUSE^RSMB_MOUSE^Q:127-546,H:2-142^75.18%ID^E:5e-45^RecName: Full=Small nuclear ribonucleoprotein-associated protein B;^Eukaryota; Metazoa; Chordata; Craniata; Vertebrata; Euteleostomi; Mammalia; Eutheria; Euarchontoglires; Glires; Rodentia; Sciurognathi; Muroidea; Muridae; Murinae; Mus; Mus	PF01423.19^LSM^LSM domain^11-81^E:9.3e-18
2	neural + ciliary-bands	CapteG223700	2.22e-273	1.22441	0.338	0	3.65e-269	.	PF07679.13^I-set^Immunoglobulin I-set domain^15-97^E:3.5e-09
2	neural + ciliary-bands	CapteG20984	1.2e-271	1.25235	0.336	0	1.97e-267	YQA3_THEAQ^YQA3_THEAQ^Q:141-527,H:3-122^32.56%ID^E:3e-06^RecName: Full=Universal stress protein in QAH/OAS sulfhydrylase 3'region;^Bacteria; Deinococcus-Thermus; Deinococci; Thermales; Thermaceae; Thermus	PF00582.23^Usp^Universal stress protein family^8-151^E:7.1e-34
2	neural + ciliary-bands	CapteG170370	1.2e-271	1.23151	0.336	0	1.97e-267	TCPQ_CHICK^TCPQ_CHICK^Q:9-1640,H:1-545^65.69%ID^E:0^RecName: Full=T-complex protein 1 subunit theta;^Eukaryota; Metazoa; Chordata; Craniata; Vertebrata; Euteleostomi; Archelosauria; Archosauria; Dinosauria; Saurischia; Theropoda; Coelurosauria; Aves; Neognathae; Galloanserae; Galliformes; Phasianidae; Phasianinae; Gallus	PF00118.21^Cpn60_TCP1^TCP-1/cpn60 chaperonin family^39-528^E:1.5e-149
2	neural + ciliary-bands	CapteG219465	1.2e-271	1.15848	0.336	0	1.97e-267	FUBP3_HUMAN^FUBP3_HUMAN^Q:637-1725,H:79-425^47.14%ID^E:1e-84^RecName: Full=Far upstream element-binding protein 3;^Eukaryota; Metazoa; Chordata; Craniata; Vertebrata; Euteleostomi; Mammalia; Eutheria; Euarchontoglires; Primates; Haplorrhini; Catarrhini; Hominidae; Homo`FUBP3_HUMAN^FUBP3_HUMAN^Q:634-1368,H:163-422^31.6%ID^E:3e-16^RecName: Full=Far upstream element-binding protein 3;^Eukaryota; Met…	PF00013.26^KH_1^KH domain^149-208^E:7.6e-15`PF00013.26^KH_1^KH domain^229-293^E:4e-16`PF00013.26^KH_1^KH domain^323-385^E:1.6e-16`PF00013.26^KH_1^KH domain^442-504^E:1.2e-14`PF09005.7^DUF1897^Domain of unknown function (DUF1897)^665-698^E:1.4e-15
2	neural + ciliary-bands	CapteG221112	9.92e-265	1.18415	0.328	0	1.63e-260	CADF_DROME^CADF_DROME^Q:71-508,H:1-148^47.68%ID^E:1e-31^RecName: Full=Cofilin/actin-depolymerizing factor homolog;^Eukaryota; Metazoa; Ecdysozoa; Arthropoda; Hexapoda; Insecta; Pterygota; Neoptera; Endopterygota; Diptera; Brachycera; Muscomorpha; Ephydroidea; Drosophilidae; Drosophila; Sophophora	PF00241.17^Cofilin_ADF^Cofilin/tropomyosin-type actin-binding protein^11-138^E:3.9e-35
2	neural + ciliary-bands	CapteG174924	2.34e-259	1.22788	0.324	0	3.85e-255	ATP5E_ARATH^ATP5E_ARATH^Q:40-216,H:3-61^42.37%ID^E:7e-12^RecName: Full=ATP synthase subunit epsilon, mitochondrial;^Eukaryota; Viridiplantae; Streptophyta; Embryophyta; Tracheophyta; Spermatophyta; Magnoliophyta; eudicotyledons; Gunneridae; Pentapetalae; rosids; malvids; Brassicales; Brassicaceae; Camelineae; Arabidopsis	PF04627.10^ATP-synt_Eps^Mitochondrial ATP synthase epsilon chain^3-50^E:8.6e-23
2	neural + ciliary-bands	CapteG219319	2.82e-261	1.20055	0.324	0	4.64e-257	SF3B6_DROME^SF3B6_DROME^Q:36-380,H:5-119^79.13%ID^E:1e-54^RecName: Full=Splicing factor 3B subunit 6-like protein;^Eukaryota; Metazoa; Ecdysozoa; Arthropoda; Hexapoda; Insecta; Pterygota; Neoptera; Endopterygota; Diptera; Brachycera; Muscomorpha; Ephydroidea; Drosophilidae; Drosophila; Sophophora	PF00076.19^RRM_1^RNA recognition motif. (a.k.a. RRM, RBD, or RNP domain)^21-87^E:6.8e-17`PF13893.3^RRM_5^RNA recognition motif. (a.k.a. RRM, RBD, or RNP domain)^23-89^E:4e-05
2	neural + ciliary-bands	CapteG218989	1.5e-259	1.20647	0.322	0	2.47e-255	OAZ1_XENLA^OAZ1_XENLA^Q:560-868,H:106-208^53.4%ID^E:4e-29^RecName: Full=Ornithine decarboxylase antizyme 1;^Eukaryota; Metazoa; Chordata; Craniata; Vertebrata; Euteleostomi; Amphibia; Batrachia; Anura; Pipoidea; Pipidae; Xenopodinae; Xenopus; Xenopus	PF02100.14^ODC_AZ^Ornithine decarboxylase antizyme^175-244^E:4.8e-18
2	neural + ciliary-bands	CapteG20184	7.98e-258	1.17513	0.32	0	1.31e-253	.	PF01290.17^Thymosin^Thymosin beta-4 family^12-45^E:2.1e-15`PF01290.17^Thymosin^Thymosin beta-4 family^51-82^E:1.4e-05`PF01290.17^Thymosin^Thymosin beta-4 family^88-121^E:1e-09`PF01290.17^Thymosin^Thymosin beta-4 family^194-226^E:1.2e-12
2	neural + ciliary-bands	CapteG177920	4.23e-256	1.2056	0.317	0	6.94e-252	CY1_BOVIN^CY1_BOVIN^Q:215-940,H:81-322^68.18%ID^E:1e-96^RecName: Full=Cytochrome c1, heme protein, mitochondrial;^Eukaryota; Metazoa; Chordata; Craniata; Vertebrata; Euteleostomi; Mammalia; Eutheria; Laurasiatheria; Cetartiodactyla; Ruminantia; Pecora; Bovidae; Bovinae; Bos	PF02167.12^Cytochrom_C1^Cytochrome C1 family^76-292^E:3.4e-91`PF13442.3^Cytochrome_CBB3^Cytochrome C oxidase, cbb3-type, subunit III^89-153^E:0.00015
2	neural + ciliary-bands	CapteG173744	3.27e-249	1.14473	0.309	0	5.37e-245	ATPG_BOVIN^ATPG_BOVIN^Q:9-815,H:22-285^54.44%ID^E:4e-101^RecName: Full=ATP synthase subunit gamma, mitochondrial;^Eukaryota; Metazoa; Chordata; Craniata; Vertebrata; Euteleostomi; Mammalia; Eutheria; Laurasiatheria; Cetartiodactyla; Ruminantia; Pecora; Bovidae; Bovinae; Bos	PF00231.16^ATP-synt^ATP synthase^3-278^E:1.5e-71
2	neural + ciliary-bands	CapteG156731	3.27e-249	1.12799	0.309	0	5.37e-245	TPM1_BIOGL^TPM1_BIOGL^Q:183-1034,H:1-284^72.89%ID^E:3e-105^RecName: Full=Tropomyosin-1;^Eukaryota; Metazoa; Lophotrochozoa; Mollusca; Gastropoda; Heterobranchia; Euthyneura; Panpulmonata; Hygrophila; Planorboidea; Planorbidae; Biomphalaria	PF00261.17^Tropomyosin^Tropomyosin^11-82^E:1.1e-08`PF12718.4^Tropomyosin_1^Tropomyosin like^12-157^E:2.7e-33`PF00261.17^Tropomyosin^Tropomyosin^69-287^E:3.1e-83
2	neural + ciliary-bands	CapteG164311	1.71e-247	1.22256	0.307	0	2.82e-243	SSRG_HUMAN^SSRG_HUMAN^Q:22-510,H:1-167^71.26%ID^E:1e-79^RecName: Full=Translocon-associated protein subunit gamma;^Eukaryota; Metazoa; Chordata; Craniata; Vertebrata; Euteleostomi; Mammalia; Eutheria; Euarchontoglires; Primates; Haplorrhini; Catarrhini; Hominidae; Homo	PF07074.9^TRAP-gamma^Translocon-associated protein, gamma subunit (TRAP-gamma)^11-179^E:5e-84
2	neural + ciliary-bands	CapteG182474	8.98e-246	1.05677	0.305	0	1.48e-241	PSMD1_CHICK^PSMD1_CHICK^Q:100-2892,H:2-935^70.71%ID^E:0^RecName: Full=26S proteasome non-ATPase regulatory subunit 1;^Eukaryota; Metazoa; Chordata; Craniata; Vertebrata; Euteleostomi; Archelosauria; Archosauria; Dinosauria; Saurischia; Theropoda; Coelurosauria; Aves; Neognathae; Galloanserae; Galliformes; Phasianidae; Phasianinae; Gallus	PF01851.19^PC_rep^Proteasome/cyclosome repeat^443-475^E:1.1e-05`PF01851.19^PC_rep^Proteasome/cyclosome repeat^478-510^E:5.4e-05`PF13646.3^HEAT_2^HEAT repeats^603-691^E:2.9e-13`PF01851.19^PC_rep^Proteasome/cyclosome repeat^653-687^E:2.4e-08
2	neural + ciliary-bands	CapteG21433	4.69e-244	1.11001	0.303	0	7.71e-240	.	PF08560.7^DUF1757^Protein of unknown function (DUF1757)^8-138^E:1.2e-28
2	neural + ciliary-bands	CapteG220438	4.69e-244	1.10268	0.303	0	7.71e-240	MBB1A_DANRE^MBB1A_DANRE^Q:10-2004,H:33-716^24.47%ID^E:4e-25^RecName: Full=Myb-binding protein 1A-like protein;^Eukaryota; Metazoa; Chordata; Craniata; Vertebrata; Euteleostomi; Actinopterygii; Neopterygii; Teleostei; Ostariophysi; Cypriniformes; Cyprinidae; Danio	PF04931.10^DNA_pol_phi^DNA polymerase phi^47-796^E:4.2e-121
2	neural + ciliary-bands	CapteG156498	1.27e-240	1.07513	0.299	0	2.09e-236	EIF3D_DANRE^EIF3D_DANRE^Q:64-1659,H:1-530^65.36%ID^E:0^RecName: Full=Eukaryotic translation initiation factor 3 subunit D {ECO:0000255|HAMAP-Rule:MF_03003};^Eukaryota; Metazoa; Chordata; Craniata; Vertebrata; Euteleostomi; Actinopterygii; Neopterygii; Teleostei; Ostariophysi; Cypriniformes; Cyprinidae; Danio	PF05091.9^eIF-3_zeta^Eukaryotic translation initiation factor 3 subunit 7 (eIF-3)^5-526^E:4.1e-211
2	neural + ciliary-bands	CapteG174895	6.63e-239	1.18951	0.297	0	1.09e-234	HIG1A_RAT^HIG1A_RAT^Q:170-370,H:20-86^41.79%ID^E:6e-13^RecName: Full=HIG1 domain family member 1A, mitochondrial;^Eukaryota; Metazoa; Chordata; Craniata; Vertebrata; Euteleostomi; Mammalia; Eutheria; Euarchontoglires; Glires; Rodentia; Sciurognathi; Muroidea; Muridae; Murinae; Rattus	PF04588.10^HIG_1_N^Hypoxia induced protein conserved region^25-76^E:5.2e-17
2	neural + ciliary-bands	CapteG220433	3.44e-237	1.07386	0.295	0	5.65e-233	ALF_SCHMA^ALF_SCHMA^Q:57-1145,H:1-363^74.1%ID^E:0^RecName: Full=Fructose-bisphosphate aldolase;^Eukaryota; Metazoa; Platyhelminthes; Trematoda; Digenea; Strigeidida; Schistosomatoidea; Schistosomatidae; Schistosoma	PF00274.16^Glycolytic^Fructose-bisphosphate aldolase class-I^15-363^E:2.7e-184
2	neural + ciliary-bands	CapteG184508	1.25e-228	1.09125	0.284	0	2.06e-224	QCR2_BOVIN^QCR2_BOVIN^Q:151-1383,H:37-453^38.48%ID^E:9e-97^RecName: Full=Cytochrome b-c1 complex subunit 2, mitochondrial;^Eukaryota; Metazoa; Chordata; Craniata; Vertebrata; Euteleostomi; Mammalia; Eutheria; Laurasiatheria; Cetartiodactyla; Ruminantia; Pecora; Bovidae; Bovinae; Bos	PF00675.17^Peptidase_M16^Insulinase (Peptidase family M16)^44-188^E:7.3e-22`PF05193.18^Peptidase_M16_C^Peptidase M16 inactive domain^196-367^E:2.7e-15
2	neural + ciliary-bands	CapteG155245	1.25e-228	1.05699	0.284	0	2.06e-224	FBRL_MOUSE^FBRL_MOUSE^Q:310-1020,H:90-326^82.28%ID^E:1e-142^RecName: Full=rRNA 2'-O-methyltransferase fibrillarin;^Eukaryota; Metazoa; Chordata; Craniata; Vertebrata; Euteleostomi; Mammalia; Eutheria; Euarchontoglires; Glires; Rodentia; Sciurognathi; Muroidea; Muridae; Murinae; Mus; Mus	PF01269.14^Fibrillarin^Fibrillarin^80-306^E:3e-108`PF08704.7^GCD14^tRNA methyltransferase complex GCD14 subunit^145-263^E:7e-06
2	neural + ciliary-bands	CapteG162446	1.25e-228	1.05588	0.284	0	2.06e-224	GLRX1_PIG^GLRX1_PIG^Q:327-566,H:3-79^41.25%ID^E:2e-11^RecName: Full=Glutaredoxin-1;^Eukaryota; Metazoa; Chordata; Craniata; Vertebrata; Euteleostomi; Mammalia; Eutheria; Laurasiatheria; Cetartiodactyla; Suina; Suidae; Sus	PF00462.21^Glutaredoxin^Glutaredoxin^19-86^E:7.9e-17
2	neural + ciliary-bands	CapteG100178	6.42e-227	1.12269	0.282	0	1.06e-222	CBX3_PONAB^CBX3_PONAB^Q:13-219,H:113-181^79.71%ID^E:1e-34^RecName: Full=Chromobox protein homolog 3;^Eukaryota; Metazoa; Chordata; Craniata; Vertebrata; Euteleostomi; Mammalia; Eutheria; Euarchontoglires; Primates; Haplorrhini; Catarrhini; Hominidae; Pongo	PF01393.16^Chromo_shadow^Chromo shadow domain^15-66^E:8.4e-27
2	neural + ciliary-bands	CapteG160845	3.29e-225	1.10185	0.28	0	5.4e-221	DNJA1_PONAB^DNJA1_PONAB^Q:111-1307,H:1-395^67.25%ID^E:2e-165^RecName: Full=DnaJ homolog subfamily A member 1;^Eukaryota; Metazoa; Chordata; Craniata; Vertebrata; Euteleostomi; Mammalia; Eutheria; Euarchontoglires; Primates; Haplorrhini; Catarrhini; Hominidae; Pongo	PF00226.28^DnaJ^DnaJ domain^7-65^E:4e-25`PF01556.15^DnaJ_C^DnaJ C terminal domain^111-332^E:3.7e-42`PF00684.16^DnaJ_CXXCXGXG^DnaJ central domain^137-203^E:2e-16
2	neural + ciliary-bands	CapteG149444	3.29e-225	1.06363	0.28	0	5.4e-221	SMD2_CAEEL^SMD2_CAEEL^Q:90-428,H:2-114^84.96%ID^E:2e-50^RecName: Full=Probable small nuclear ribonucleoprotein Sm D2;^Eukaryota; Metazoa; Ecdysozoa; Nematoda; Chromadorea; Rhabditida; Rhabditoidea; Rhabditidae; Peloderinae; Caenorhabditis	PF01423.19^LSM^LSM domain^38-110^E:1.6e-19
2	neural + ciliary-bands	CapteG155752	1.68e-223	1.0823	0.278	0	2.76e-219	TBB_PARLI^TBB_PARLI^Q:40-864,H:152-426^99.27%ID^E:0^RecName: Full=Tubulin beta chain;^Eukaryota; Metazoa; Echinodermata; Eleutherozoa; Echinozoa; Echinoidea; Euechinoidea; Echinacea; Echinoida; Echinidae; Paracentrotus	PF00091.22^Tubulin^Tubulin/FtsZ family, GTPase domain^2-65^E:1.1e-14`PF03953.14^Tubulin_C^Tubulin C-terminal domain^115-235^E:2.7e-44
2	neural + ciliary-bands	CapteG183717	3.53e-218	1.05	0.274	0	5.79e-214	NSA2_HUMAN^NSA2_HUMAN^Q:31-786,H:2-253^80.16%ID^E:3e-138^RecName: Full=Ribosome biogenesis protein NSA2 homolog;^Eukaryota; Metazoa; Chordata; Craniata; Vertebrata; Euteleostomi; Mammalia; Eutheria; Euarchontoglires; Primates; Haplorrhini; Catarrhini; Hominidae; Homo	PF01201.19^Ribosomal_S8e^Ribosomal protein S8e^41-268^E:1.3e-47
2	neural + ciliary-bands	CapteG226675	2.21e-218	1.09009	0.272	0	3.63e-214	C560_CRIGR^C560_CRIGR^Q:125-514,H:22-153^43.28%ID^E:1e-31^RecName: Full=Succinate dehydrogenase cytochrome b560 subunit, mitochondrial;^Eukaryota; Metazoa; Chordata; Craniata; Vertebrata; Euteleostomi; Mammalia; Eutheria; Euarchontoglires; Glires; Rodentia; Sciurognathi; Muroidea; Cricetidae; Cricetinae; Cricetulus	PF01127.19^Sdh_cyt^Succinate dehydrogenase/Fumarate reductase transmembrane subunit^45-162^E:5.1e-19
2	neural + ciliary-bands	CapteG779	2.21e-218	1.03483	0.272	0	3.63e-214	DAP1_HUMAN^DAP1_HUMAN^Q:100-417,H:1-101^40.74%ID^E:1e-11^RecName: Full=Death-associated protein 1;^Eukaryota; Metazoa; Chordata; Craniata; Vertebrata; Euteleostomi; Mammalia; Eutheria; Euarchontoglires; Primates; Haplorrhini; Catarrhini; Hominidae; Homo	PF15228.3^DAP^Death-associated protein^10-105^E:9.4e-22
2	neural + ciliary-bands	CapteG223849	5.67e-215	1.03551	0.268	0	9.31e-211	ART2_YEAST^ART2_YEAST^Q:115-258,H:2-49^75%ID^E:5e-15^RecName: Full=Putative uncharacterized protein ART2;^Eukaryota; Fungi; Dikarya; Ascomycota; Saccharomycotina; Saccharomycetes; Saccharomycetales; Saccharomycetaceae; Saccharomyces	.
2	neural + ciliary-bands	CapteG164650	2.86e-213	1.11475	0.266	0	4.7e-209	BZW1_CHICK^BZW1_CHICK^Q:43-1269,H:1-405^52.57%ID^E:2e-152^RecName: Full=Basic leucine zipper and W2 domain-containing protein 1;^Eukaryota; Metazoa; Chordata; Craniata; Vertebrata; Euteleostomi; Archelosauria; Archosauria; Dinosauria; Saurischia; Theropoda; Coelurosauria; Aves; Neognathae; Galloanserae; Galliformes; Phasianidae; Phasianinae; Gallus	PF02020.15^W2^eIF4-gamma/eIF5/eIF2-epsilon^341-417^E:1.3e-22
2	neural + ciliary-bands	CapteG180899	2.86e-213	1.08411	0.266	0	4.7e-209	RANG_MOUSE^RANG_MOUSE^Q:98-529,H:20-163^63.19%ID^E:1e-55^RecName: Full=Ran-specific GTPase-activating protein;^Eukaryota; Metazoa; Chordata; Craniata; Vertebrata; Euteleostomi; Mammalia; Eutheria; Euarchontoglires; Glires; Rodentia; Sciurognathi; Muroidea; Muridae; Murinae; Mus; Mus	PF00638.15^Ran_BP1^RanBP1 domain^27-149^E:1.4e-45
2	neural + ciliary-bands	CapteG222005	2.86e-213	0.997438	0.266	0	4.7e-209	ATRX_MOUSE^ATRX_MOUSE^Q:4063-6384,H:1512-2244^51.79%ID^E:0^RecName: Full=Transcriptional regulator ATRX;^Eukaryota; Metazoa; Chordata; Craniata; Vertebrata; Euteleostomi; Mammalia; Eutheria; Euarchontoglires; Glires; Rodentia; Sciurognathi; Muroidea; Muridae; Murinae; Mus; Mus`ATRX_MOUSE^ATRX_MOUSE^Q:409-984,H:120-306^40.19%ID^E:3e-43^RecName: Full=Transcriptional regulator ATRX;^Eukaryota; Metaz…	PF00176.20^SNF2_N^SNF2 family N-terminal domain^1399-1708^E:5.7e-59`PF00271.28^Helicase_C^Helicase conserved C-terminal domain^1895-2026^E:2.6e-12
2	neural + ciliary-bands	CapteG176678	2.86e-213	0.948662	0.266	0	4.7e-209	SARNP_MOUSE^SARNP_MOUSE^Q:336-686,H:93-209^43.9%ID^E:8e-12^RecName: Full=SAP domain-containing ribonucleoprotein;^Eukaryota; Metazoa; Chordata; Craniata; Vertebrata; Euteleostomi; Mammalia; Eutheria; Euarchontoglires; Glires; Rodentia; Sciurognathi; Muroidea; Muridae; Murinae; Mus; Mus`SARNP_MOUSE^SARNP_MOUSE^Q:480-776,H:98-210^40.52%ID^E:8e-11^RecName: Full=SAP domain-containing ribonucleoprotei…	PF02037.24^SAP^SAP domain^4-37^E:2.2e-14
2	neural + ciliary-bands	CapteG164374	7.25e-210	1.05116	0.261	0	1.19e-205	ATPD_MOUSE^ATPD_MOUSE^Q:139-531,H:38-168^58.02%ID^E:3e-38^RecName: Full=ATP synthase subunit delta, mitochondrial;^Eukaryota; Metazoa; Chordata; Craniata; Vertebrata; Euteleostomi; Mammalia; Eutheria; Euarchontoglires; Glires; Rodentia; Sciurognathi; Muroidea; Muridae; Murinae; Mus; Mus	PF02823.13^ATP-synt_DE_N^ATP synthase, Delta/Epsilon chain, beta-sandwich domain^34-115^E:4.7e-18
2	neural + ciliary-bands	CapteG222177	3.64e-208	0.945851	0.259	0	5.98e-204	RBP56_HUMAN^RBP56_HUMAN^Q:244-705,H:234-379^50.65%ID^E:6e-30^RecName: Full=TATA-binding protein-associated factor 2N;^Eukaryota; Metazoa; Chordata; Craniata; Vertebrata; Euteleostomi; Mammalia; Eutheria; Euarchontoglires; Primates; Haplorrhini; Catarrhini; Hominidae; Homo	PF00076.19^RRM_1^RNA recognition motif. (a.k.a. RRM, RBD, or RNP domain)^84-162^E:2.4e-12`PF00641.15^zf-RanBP^Zn-finger in Ran binding protein and others^210-240^E:3e-08
2	neural + ciliary-bands	CapteG162196	3.64e-208	0.943974	0.259	0	5.98e-204	EIF3A_DANRE^EIF3A_DANRE^Q:1-2310,H:1-779^62.64%ID^E:0^RecName: Full=Eukaryotic translation initiation factor 3 subunit A {ECO:0000255|HAMAP-Rule:MF_03000};^Eukaryota; Metazoa; Chordata; Craniata; Vertebrata; Euteleostomi; Actinopterygii; Neopterygii; Teleostei; Ostariophysi; Cypriniformes; Cyprinidae; Danio	PF01399.24^PCI^PCI domain^409-486^E:3.5e-12
2	neural + ciliary-bands	CapteG154858	1.82e-206	1.01363	0.257	0	3e-202	EIF3K_XENTR^EIF3K_XENTR^Q:21-662,H:5-218^62.62%ID^E:4e-95^RecName: Full=Eukaryotic translation initiation factor 3 subunit K {ECO:0000255|HAMAP-Rule:MF_03010};^Eukaryota; Metazoa; Chordata; Craniata; Vertebrata; Euteleostomi; Amphibia; Batrachia; Anura; Pipoidea; Pipidae; Xenopodinae; Xenopus; Silurana	PF10075.6^CSN8_PSD8_EIF3K^CSN8/PSMD8/EIF3K family^59-197^E:5.3e-28
2	neural + ciliary-bands	CapteG175733	2.51e-204	1.00068	0.257	0	4.13e-200	SC61B_PONAB^SC61B_PONAB^Q:63-293,H:18-96^70.89%ID^E:9e-28^RecName: Full=Protein transport protein Sec61 subunit beta;^Eukaryota; Metazoa; Chordata; Craniata; Vertebrata; Euteleostomi; Mammalia; Eutheria; Euarchontoglires; Primates; Haplorrhini; Catarrhini; Hominidae; Pongo	PF03911.13^Sec61_beta^Sec61beta family^48-88^E:1.1e-21
2	neural + ciliary-bands	CapteG155246	1.82e-206	0.960152	0.257	0	3e-202	DDX6_DROME^DDX6_DROME^Q:259-1467,H:33-435^81.39%ID^E:0^RecName: Full=Putative ATP-dependent RNA helicase me31b;^Eukaryota; Metazoa; Ecdysozoa; Arthropoda; Hexapoda; Insecta; Pterygota; Neoptera; Endopterygota; Diptera; Brachycera; Muscomorpha; Ephydroidea; Drosophilidae; Drosophila; Sophophora	PF00270.26^DEAD^DEAD/DEAH box helicase^93-257^E:3.6e-42`PF00271.28^Helicase_C^Helicase conserved C-terminal domain^294-400^E:3.5e-27
2	neural + ciliary-bands	CapteG226845	1.82e-206	0.943279	0.257	0	3e-202	PPHLN_MOUSE^PPHLN_MOUSE^Q:1079-1267,H:308-370^55.56%ID^E:2e-14^RecName: Full=Periphilin-1 {ECO:0000250|UniProtKB:Q8NEY8};^Eukaryota; Metazoa; Chordata; Craniata; Vertebrata; Euteleostomi; Mammalia; Eutheria; Euarchontoglires; Glires; Rodentia; Sciurognathi; Muroidea; Muridae; Murinae; Mus; Mus	PF11488.5^Lge1^Transcriptional regulatory protein LGE1^361-413^E:2.8e-08
2	neural + ciliary-bands	CapteG151328	9.12e-205	1.08546	0.255	0	1.5e-200	QCR8_MOUSE^QCR8_MOUSE^Q:44-289,H:1-81^42.68%ID^E:8e-18^RecName: Full=Cytochrome b-c1 complex subunit 8;^Eukaryota; Metazoa; Chordata; Craniata; Vertebrata; Euteleostomi; Mammalia; Eutheria; Euarchontoglires; Glires; Rodentia; Sciurognathi; Muroidea; Muridae; Murinae; Mus; Mus	PF02939.13^UcrQ^UcrQ family^4-79^E:1.3e-25
2	neural + ciliary-bands	CapteG164217	9.12e-205	0.991765	0.255	0	1.5e-200	U2AF4_BOVIN^U2AF4_BOVIN^Q:1-558,H:1-186^84.41%ID^E:3e-107^RecName: Full=Splicing factor U2AF 26 kDa subunit;^Eukaryota; Metazoa; Chordata; Craniata; Vertebrata; Euteleostomi; Mammalia; Eutheria; Laurasiatheria; Cetartiodactyla; Ruminantia; Pecora; Bovidae; Bovinae; Bos	PF00642.21^zf-CCCH^Zinc finger C-x8-C-x5-C-x3-H type (and similar)^15-38^E:1.4e-06`PF00076.19^RRM_1^RNA recognition motif. (a.k.a. RRM, RBD, or RNP domain)^91-141^E:4.6e-06`PF00642.21^zf-CCCH^Zinc finger C-x8-C-x5-C-x3-H type (and similar)^150-174^E:1.3e-06
2	neural + ciliary-bands	CapteG165362	7.56e-203	0.984245	0.255	0	1.24e-198	SUMO1_XENTR^SUMO1_XENTR^Q:89-376,H:1-95^61.46%ID^E:4e-35^RecName: Full=Small ubiquitin-related modifier 1;^Eukaryota; Metazoa; Chordata; Craniata; Vertebrata; Euteleostomi; Amphibia; Batrachia; Anura; Pipoidea; Pipidae; Xenopodinae; Xenopus; Silurana	PF11976.5^Rad60-SLD^Ubiquitin-2 like Rad60 SUMO-like^24-93^E:1.5e-22`PF00240.20^ubiquitin^Ubiquitin family^24-96^E:3.7e-18
2	neural + ciliary-bands	CapteG176468	3.96e-201	1.12249	0.253	0	6.51e-197	ACTB_XENLA^ACTB_XENLA^Q:84-1094,H:39-375^98.22%ID^E:0^RecName: Full=Actin, cytoplasmic 1;^Eukaryota; Metazoa; Chordata; Craniata; Vertebrata; Euteleostomi; Amphibia; Batrachia; Anura; Pipoidea; Pipidae; Xenopodinae; Xenopus; Xenopus`ACTB_XENLA^ACTB_XENLA^Q:1-96,H:7-38^100%ID^E:5e-12^RecName: Full=Actin, cytoplasmic 1;^Eukaryota; Metazoa; Chordata; Craniata; Vertebrata; Euteleostomi; Amphibia; Bat…	PF00022.16^Actin^Actin^7-332^E:1e-133
2	neural + ciliary-bands	CapteG226933	4.55e-203	1.01124	0.253	0	7.48e-199	NDUA8_PANTR^NDUA8_PANTR^Q:91-525,H:7-152^48.63%ID^E:1e-43^RecName: Full=NADH dehydrogenase [ubiquinone] 1 alpha subcomplex subunit 8;^Eukaryota; Metazoa; Chordata; Craniata; Vertebrata; Euteleostomi; Mammalia; Eutheria; Euarchontoglires; Primates; Haplorrhini; Catarrhini; Hominidae; Pan	PF06747.10^CHCH^CHCH domain^80-114^E:2.1e-06
2	neural + ciliary-bands	CapteG173491	4.55e-203	0.987813	0.253	0	7.48e-199	FKBP4_MOUSE^FKBP4_MOUSE^Q:144-1358,H:19-424^50.25%ID^E:9e-130^RecName: Full=Peptidyl-prolyl cis-trans isomerase FKBP4;^Eukaryota; Metazoa; Chordata; Craniata; Vertebrata; Euteleostomi; Mammalia; Eutheria; Euarchontoglires; Glires; Rodentia; Sciurognathi; Muroidea; Muridae; Murinae; Mus; Mus	PF00254.25^FKBP_C^FKBP-type peptidyl-prolyl cis-trans isomerase^36-123^E:4.6e-29`PF00254.25^FKBP_C^FKBP-type peptidyl-prolyl cis-trans isomerase^151-238^E:7.7e-15`PF00515.25^TPR_1^Tetratricopeptide repeat^343-375^E:6.5e-07`PF07719.14^TPR_2^Tetratricopeptide repeat^343-375^E:2.4e-05`PF13181.3^TPR_8^Tetratricopeptide repeat^343-375^E:0.00099
2	neural + ciliary-bands	CapteG228884	4.55e-203	0.938057	0.253	0	7.48e-199	ZBT26_HUMAN^ZBT26_HUMAN^Q:3346-3765,H:274-378^28.57%ID^E:1e-05^RecName: Full=Zinc finger and BTB domain-containing protein 26;^Eukaryota; Metazoa; Chordata; Craniata; Vertebrata; Euteleostomi; Mammalia; Eutheria; Euarchontoglires; Primates; Haplorrhini; Catarrhini; Hominidae; Homo	.
2	neural + ciliary-bands	CapteG152113	4.55e-203	0.926393	0.253	0	7.48e-199	PSA4_RAT^PSA4_RAT^Q:60-770,H:1-237^81.43%ID^E:9e-145^RecName: Full=Proteasome subunit alpha type-4;^Eukaryota; Metazoa; Chordata; Craniata; Vertebrata; Euteleostomi; Mammalia; Eutheria; Euarchontoglires; Glires; Rodentia; Sciurognathi; Muroidea; Muridae; Murinae; Rattus	PF10584.6^Proteasome_A_N^Proteasome subunit A N-terminal signature^5-27^E:1.1e-13`PF00227.23^Proteasome^Proteasome subunit^30-215^E:8.6e-54
2	neural + ciliary-bands	CapteG149896	2.27e-201	1.00166	0.251	0	3.73e-197	KLOM_EISFE^KLOM_EISFE^Q:222-1307,H:3-366^76.37%ID^E:0^RecName: Full=Lombricine kinase;^Eukaryota; Metazoa; Lophotrochozoa; Annelida; Clitellata; Oligochaeta; Haplotaxida; Lumbricina; Lumbricidae; Lumbricinae; Eisenia	PF02807.12^ATP-gua_PtransN^ATP:guanido phosphotransferase, N-terminal domain^48-116^E:1.8e-23`PF00217.16^ATP-gua_Ptrans^ATP:guanido phosphotransferase, C-terminal catalytic domain^138-383^E:2.4e-86
2	neural + ciliary-bands	CapteG227786	1.13e-199	0.904259	0.249	0	1.85e-195	NDUS6_MACFA^NDUS6_MACFA^Q:19-363,H:1-119^51.26%ID^E:1e-30^RecName: Full=NADH dehydrogenase [ubiquinone] iron-sulfur protein 6, mitochondrial;^Eukaryota; Metazoa; Chordata; Craniata; Vertebrata; Euteleostomi; Mammalia; Eutheria; Euarchontoglires; Primates; Haplorrhini; Catarrhini; Cercopithecidae; Cercopithecinae; Macaca	PF10276.6^zf-CHCC^Zinc-finger domain^90-118^E:1.9e-11
2	neural + ciliary-bands	CapteG148665	5.6e-198	1.09539	0.247	0	9.19e-194	PHS_HYPDU^PHS_HYPDU^Q:37-318,H:5-97^73.4%ID^E:9e-43^RecName: Full=Probable pterin-4-alpha-carbinolamine dehydratase;^Eukaryota; Metazoa; Ecdysozoa; Tardigrada; Eutardigrada; Parachela; Hypsibiidae; Hypsibius	PF01329.16^Pterin_4a^Pterin 4 alpha carbinolamine dehydratase^2-95^E:2e-31
2	neural + ciliary-bands	CapteG21369	5.6e-198	1.07366	0.247	0	9.19e-194	HSBP1_HUMAN^HSBP1_HUMAN^Q:87-266,H:4-63^78.33%ID^E:1e-25^RecName: Full=Heat shock factor-binding protein 1;^Eukaryota; Metazoa; Chordata; Craniata; Vertebrata; Euteleostomi; Mammalia; Eutheria; Euarchontoglires; Primates; Haplorrhini; Catarrhini; Hominidae; Homo	PF06825.9^HSBP1^Heat shock factor binding protein 1^19-69^E:6.9e-29
2	neural + ciliary-bands	CapteG170444	4.96e-196	1.00772	0.247	0	8.15e-192	CALX_CANLF^CALX_CANLF^Q:469-1896,H:43-510^60.5%ID^E:2e-163^RecName: Full=Calnexin;^Eukaryota; Metazoa; Chordata; Craniata; Vertebrata; Euteleostomi; Mammalia; Eutheria; Laurasiatheria; Carnivora; Caniformia; Canidae; Canis	PF00262.15^Calreticulin^Calreticulin family^81-452^E:1.6e-162
2	neural + ciliary-bands	CapteG160432	2.77e-196	1.01265	0.245	0	4.55e-192	URIC_RABIT^URIC_RABIT^Q:176-1066,H:7-300^48.82%ID^E:8e-97^RecName: Full=Uricase;^Eukaryota; Metazoa; Chordata; Craniata; Vertebrata; Euteleostomi; Mammalia; Eutheria; Euarchontoglires; Glires; Lagomorpha; Leporidae; Oryctolagus	PF01014.15^Uricase^Uricase^12-134^E:1.9e-21`PF01014.15^Uricase^Uricase^146-288^E:1.3e-31
2	neural + ciliary-bands	CapteG224518	2.77e-196	1.0001	0.245	0	4.55e-192	HP1B3_BOVIN^HP1B3_BOVIN^Q:898-1401,H:251-422^36.99%ID^E:5e-22^RecName: Full=Heterochromatin protein 1-binding protein 3;^Eukaryota; Metazoa; Chordata; Craniata; Vertebrata; Euteleostomi; Mammalia; Eutheria; Laurasiatheria; Cetartiodactyla; Ruminantia; Pecora; Bovidae; Bovinae; Bos`HP1B3_BOVIN^HP1B3_BOVIN^Q:913-1374,H:167-330^31.61%ID^E:1e-15^RecName: Full=Heterochromatin protein 1-binding protein…	PF00538.16^Linker_histone^linker histone H1 and H5 family^314-374^E:3e-07`PF00538.16^Linker_histone^linker histone H1 and H5 family^391-457^E:4.5e-09
2	neural + ciliary-bands	CapteG150692	2.77e-196	0.955417	0.245	0	4.55e-192	TCPH_CHICK^TCPH_CHICK^Q:129-1703,H:2-526^80.95%ID^E:0^RecName: Full=T-complex protein 1 subunit eta;^Eukaryota; Metazoa; Chordata; Craniata; Vertebrata; Euteleostomi; Archelosauria; Archosauria; Dinosauria; Saurischia; Theropoda; Coelurosauria; Aves; Neognathae; Galloanserae; Galliformes; Phasianidae; Phasianinae; Gallus	PF00118.21^Cpn60_TCP1^TCP-1/cpn60 chaperonin family^32-520^E:9.1e-157
2	neural + ciliary-bands	CapteG149229	2.77e-196	0.915666	0.245	0	4.55e-192	NDUS8_PONAB^NDUS8_PONAB^Q:72-629,H:25-210^75.81%ID^E:1e-102^RecName: Full=NADH dehydrogenase [ubiquinone] iron-sulfur protein 8, mitochondrial;^Eukaryota; Metazoa; Chordata; Craniata; Vertebrata; Euteleostomi; Mammalia; Eutheria; Euarchontoglires; Primates; Haplorrhini; Catarrhini; Hominidae; Pongo	PF00037.24^Fer4^4Fe-4S binding domain^106-125^E:2.9e-05`PF13237.3^Fer4_10^4Fe-4S dicluster domain^106-159^E:2.2e-06`PF12800.4^Fer4_4^4Fe-4S binding domain^107-122^E:0.00021`PF12838.4^Fer4_7^4Fe-4S dicluster domain^108-162^E:1.3e-12`PF13187.3^Fer4_9^4Fe-4S dicluster domain^108-163^E:2.3e-08`PF00037.24^Fer4^4Fe-4S binding domain^142-163^E:1.4e-08`PF12800.4^Fer4_4^4Fe-4S binding domain^147-160^E:0.84
2	neural + ciliary-bands	CapteG157160	2.77e-196	0.914492	0.245	0	4.55e-192	CTNB_URECA^CTNB_URECA^Q:1-2373,H:21-818^84.49%ID^E:0^RecName: Full=Catenin beta;^Eukaryota; Metazoa; Lophotrochozoa; Annelida; Polychaeta; Echiura; Xenopneusta; Urechidae; Urechis	PF00514.20^Arm^Armadillo/beta-catenin-like repeat^228-260^E:1.9e-06`PF00514.20^Arm^Armadillo/beta-catenin-like repeat^430-472^E:2.2e-06`PF00514.20^Arm^Armadillo/beta-catenin-like repeat^584-623^E:1.7e-06
2	neural + ciliary-bands	CapteG162481	6.76e-193	1.03465	0.241	0	1.11e-188	SSRD_MOUSE^SSRD_MOUSE^Q:93-539,H:23-171^40.94%ID^E:2e-40^RecName: Full=Translocon-associated protein subunit delta;^Eukaryota; Metazoa; Chordata; Craniata; Vertebrata; Euteleostomi; Mammalia; Eutheria; Euarchontoglires; Glires; Rodentia; Sciurognathi; Muroidea; Muridae; Murinae; Mus; Mus	PF05404.9^TRAP-delta^Translocon-associated protein, delta subunit precursor (TRAP-delta)^11-170^E:1.8e-55
2	neural + ciliary-bands	CapteG225471	6.76e-193	0.879259	0.241	0	1.11e-188	NDUV1_MOUSE^NDUV1_MOUSE^Q:1-1389,H:10-464^71.06%ID^E:0^RecName: Full=NADH dehydrogenase [ubiquinone] flavoprotein 1, mitochondrial;^Eukaryota; Metazoa; Chordata; Craniata; Vertebrata; Euteleostomi; Mammalia; Eutheria; Euarchontoglires; Glires; Rodentia; Sciurognathi; Muroidea; Muridae; Murinae; Mus; Mus	PF01512.14^Complex1_51K^Respiratory-chain NADH dehydrogenase 51 Kd subunit^65-235^E:6.5e-52`PF10531.6^SLBB^SLBB domain^270-319^E:4.2e-06`PF10589.6^NADH_4Fe-4S^NADH-ubiquinone oxidoreductase-F iron-sulfur binding region^360-440^E:4.1e-29
2	neural + ciliary-bands	CapteG183346	3.33e-191	0.957215	0.239	0	5.47e-187	METK2_RAT^METK2_RAT^Q:119-1255,H:17-395^77.57%ID^E:0^RecName: Full=S-adenosylmethionine synthase isoform type-2;^Eukaryota; Metazoa; Chordata; Craniata; Vertebrata; Euteleostomi; Mammalia; Eutheria; Euarchontoglires; Glires; Rodentia; Sciurognathi; Muroidea; Muridae; Murinae; Rattus	PF00438.17^S-AdoMet_synt_N^S-adenosylmethionine synthetase, N-terminal domain^15-112^E:2.8e-43`PF02772.13^S-AdoMet_synt_M^S-adenosylmethionine synthetase, central domain^127-247^E:1.6e-43`PF02773.13^S-AdoMet_synt_C^S-adenosylmethionine synthetase, C-terminal domain^249-386^E:6.5e-68
2	neural + ciliary-bands	CapteG158751	1.64e-189	1.00238	0.237	0	2.69e-185	PNO1_XENTR^PNO1_XENTR^Q:151-741,H:40-236^79.19%ID^E:4e-115^RecName: Full=RNA-binding protein PNO1;^Eukaryota; Metazoa; Chordata; Craniata; Vertebrata; Euteleostomi; Amphibia; Batrachia; Anura; Pipoidea; Pipidae; Xenopodinae; Xenopus; Silurana	PF00013.26^KH_1^KH domain^161-209^E:0.00012
2	neural + ciliary-bands	CapteG222188	8.03e-188	0.910877	0.234	0	1.32e-183	RSZ33_ARATH^RSZ33_ARATH^Q:69-371,H:13-114^42.45%ID^E:5e-19^RecName: Full=Serine/arginine-rich splicing factor RS2Z33;^Eukaryota; Viridiplantae; Streptophyta; Embryophyta; Tracheophyta; Spermatophyta; Magnoliophyta; eudicotyledons; Gunneridae; Pentapetalae; rosids; malvids; Brassicales; Brassicaceae; Camelineae; Arabidopsis	PF00076.19^RRM_1^RNA recognition motif. (a.k.a. RRM, RBD, or RNP domain)^9-71^E:4.1e-14`PF00098.20^zf-CCHC^Zinc knuckle^95-111^E:3.5e-05
2	neural + ciliary-bands	CapteG224984	8.03e-188	0.886582	0.234	0	1.32e-183	PSA1_MOUSE^PSA1_MOUSE^Q:22-372,H:121-237^72.65%ID^E:2e-59^RecName: Full=Proteasome subunit alpha type-1;^Eukaryota; Metazoa; Chordata; Craniata; Vertebrata; Euteleostomi; Mammalia; Eutheria; Euarchontoglires; Glires; Rodentia; Sciurognathi; Muroidea; Muridae; Murinae; Mus; Mus	PF00227.23^Proteasome^Proteasome subunit^9-102^E:7.4e-24
2	neural + ciliary-bands	CapteG153237	3.93e-186	0.894309	0.232	0	6.46e-182	PSMD3_MOUSE^PSMD3_MOUSE^Q:97-1566,H:31-530^63.37%ID^E:0^RecName: Full=26S proteasome non-ATPase regulatory subunit 3;^Eukaryota; Metazoa; Chordata; Craniata; Vertebrata; Euteleostomi; Mammalia; Eutheria; Euarchontoglires; Glires; Rodentia; Sciurognathi; Muroidea; Muridae; Murinae; Mus; Mus	PF01399.24^PCI^PCI domain^340-442^E:3.6e-20`PF08375.8^Rpn3_C^Proteasome regulatory subunit C-terminal^446-512^E:3.1e-27
2	neural + ciliary-bands	CapteG152474	1.92e-184	0.925529	0.23	0	3.16e-180	2AAA_PIG^2AAA_PIG^Q:32-1801,H:1-588^79.32%ID^E:0^RecName: Full=Serine/threonine-protein phosphatase 2A 65 kDa regulatory subunit A alpha isoform;^Eukaryota; Metazoa; Chordata; Craniata; Vertebrata; Euteleostomi; Mammalia; Eutheria; Laurasiatheria; Cetartiodactyla; Suina; Suidae; Sus	PF13646.3^HEAT_2^HEAT repeats^369-469^E:1.1e-12
2	neural + ciliary-bands	CapteG228896	1.92e-184	0.92015	0.23	0	3.16e-180	PSB3_HUMAN^PSB3_HUMAN^Q:165-764,H:6-205^74.5%ID^E:2e-113^RecName: Full=Proteasome subunit beta type-3;^Eukaryota; Metazoa; Chordata; Craniata; Vertebrata; Euteleostomi; Mammalia; Eutheria; Euarchontoglires; Primates; Haplorrhini; Catarrhini; Hominidae; Homo	PF00227.23^Proteasome^Proteasome subunit^7-190^E:6e-40
2	neural + ciliary-bands	CapteG178526	9.38e-183	1.10077	0.228	0	1.54e-178	JUN_SERCA^JUN_SERCA^Q:198-1043,H:4-308^45.25%ID^E:4e-38^RecName: Full=Transcription factor AP-1;^Eukaryota; Metazoa; Chordata; Craniata; Vertebrata; Euteleostomi; Archelosauria; Archosauria; Dinosauria; Saurischia; Theropoda; Coelurosauria; Aves; Neognathae; Passeriformes; Passeroidea; Fringillidae; Carduelinae; Serinus	PF03957.10^Jun^Jun-like transcription factor^17-196^E:2.2e-38`PF03131.14^bZIP_Maf^bZIP Maf transcription factor^205-267^E:2.8e-05`PF00170.18^bZIP_1^bZIP transcription factor^209-269^E:1.8e-15`PF07716.12^bZIP_2^Basic region leucine zipper^209-260^E:2.3e-07
2	neural + ciliary-bands	CapteG158600	9.38e-183	0.986021	0.228	0	1.54e-178	CYP6_CAEEL^CYP6_CAEEL^Q:92-703,H:1-197^65.2%ID^E:1e-77^RecName: Full=Peptidyl-prolyl cis-trans isomerase 6;^Eukaryota; Metazoa; Ecdysozoa; Nematoda; Chromadorea; Rhabditida; Rhabditoidea; Rhabditidae; Peloderinae; Caenorhabditis	PF00160.18^Pro_isomerase^Cyclophilin type peptidyl-prolyl cis-trans isomerase/CLD^51-210^E:4.4e-50
2	neural + ciliary-bands	CapteG206973	9.38e-183	0.884955	0.228	0	1.54e-178	.	.
2	neural + ciliary-bands	CapteG157472	7.92e-181	0.86072	0.228	0	1.3e-176	NDUBB_HUMAN^NDUBB_HUMAN^Q:270-530,H:68-153^47.13%ID^E:4e-16^RecName: Full=NADH dehydrogenase [ubiquinone] 1 beta subcomplex subunit 11, mitochondrial;^Eukaryota; Metazoa; Chordata; Craniata; Vertebrata; Euteleostomi; Mammalia; Eutheria; Euarchontoglires; Primates; Haplorrhini; Catarrhini; Hominidae; Homo	PF10183.6^ESSS^ESSS subunit of NADH:ubiquinone oxidoreductase (complex I)^35-160^E:6.3e-23
2	neural + ciliary-bands	CapteG161800	4.57e-181	0.983057	0.226	0	7.5e-177	PCNA_CRIGR^PCNA_CRIGR^Q:84-866,H:1-261^70.88%ID^E:2e-138^RecName: Full=Proliferating cell nuclear antigen;^Eukaryota; Metazoa; Chordata; Craniata; Vertebrata; Euteleostomi; Mammalia; Eutheria; Euarchontoglires; Glires; Rodentia; Sciurognathi; Muroidea; Cricetidae; Cricetinae; Cricetulus	PF00705.15^PCNA_N^Proliferating cell nuclear antigen, N-terminal domain^1-124^E:6e-58`PF02144.13^Rad1^Repair protein Rad1/Rec1/Rad17^2-230^E:8.8e-07`PF04139.10^Rad9^Rad9^14-213^E:3.8e-08`PF02747.12^PCNA_C^Proliferating cell nuclear antigen, C-terminal domain^127-254^E:5.7e-60
2	neural + ciliary-bands	CapteG154995	4.57e-181	0.911579	0.226	0	7.5e-177	PSA2_CARAU^PSA2_CARAU^Q:23-727,H:1-234^83.05%ID^E:6e-136^RecName: Full=Proteasome subunit alpha type-2;^Eukaryota; Metazoa; Chordata; Craniata; Vertebrata; Euteleostomi; Actinopterygii; Neopterygii; Teleostei; Ostariophysi; Cypriniformes; Cyprinidae; Carassius	PF10584.6^Proteasome_A_N^Proteasome subunit A N-terminal signature^5-27^E:7.5e-10`PF00227.23^Proteasome^Proteasome subunit^29-213^E:5.2e-61
2	neural + ciliary-bands	CapteG161186	4.57e-181	0.908687	0.226	0	7.5e-177	PSA3_HUMAN^PSA3_HUMAN^Q:84-803,H:1-241^70.54%ID^E:2e-125^RecName: Full=Proteasome subunit alpha type-3;^Eukaryota; Metazoa; Chordata; Craniata; Vertebrata; Euteleostomi; Mammalia; Eutheria; Euarchontoglires; Primates; Haplorrhini; Catarrhini; Hominidae; Homo	PF10584.6^Proteasome_A_N^Proteasome subunit A N-terminal signature^8-30^E:2.5e-12`PF00227.23^Proteasome^Proteasome subunit^31-216^E:2.4e-53
2	neural + ciliary-bands	CapteG227784	2.22e-179	0.9472	0.224	0	3.65e-175	RU1C_BRAFL^RU1C_BRAFL^Q:107-307,H:1-67^83.58%ID^E:1e-37^RecName: Full=U1 small nuclear ribonucleoprotein C {ECO:0000255|HAMAP-Rule:MF_03153};^Eukaryota; Metazoa; Chordata; Cephalochordata; Branchiostomidae; Branchiostoma	PF06220.9^zf-U1^U1 zinc finger^1-38^E:8.3e-23
2	neural + ciliary-bands	CapteG152596	2.22e-179	0.822406	0.224	0	3.65e-175	PSMD6_MOUSE^PSMD6_MOUSE^Q:1-1167,H:1-389^68.12%ID^E:0^RecName: Full=26S proteasome non-ATPase regulatory subunit 6;^Eukaryota; Metazoa; Chordata; Craniata; Vertebrata; Euteleostomi; Mammalia; Eutheria; Euarchontoglires; Glires; Rodentia; Sciurognathi; Muroidea; Muridae; Murinae; Mus; Mus	PF10602.6^RPN7^26S proteasome subunit RPN7^66-239^E:1.6e-56`PF01399.24^PCI^PCI domain^256-357^E:8.6e-17
2	neural + ciliary-bands	CapteG156715	1.08e-177	0.933065	0.222	0	1.77e-173	PDIA1_CHICK^PDIA1_CHICK^Q:81-1448,H:25-484^61.52%ID^E:0^RecName: Full=Protein disulfide-isomerase;^Eukaryota; Metazoa; Chordata; Craniata; Vertebrata; Euteleostomi; Archelosauria; Archosauria; Dinosauria; Saurischia; Theropoda; Coelurosauria; Aves; Neognathae; Galloanserae; Galliformes; Phasianidae; Phasianinae; Gallus	PF00085.17^Thioredoxin^Thioredoxin^26-128^E:3.5e-31`PF13848.3^Thioredoxin_6^Thioredoxin-like domain^158-342^E:1.8e-38`PF00085.17^Thioredoxin^Thioredoxin^366-467^E:1.9e-28
2	neural + ciliary-bands	CapteG163211	5.21e-176	0.925742	0.22	0	8.57e-172	AK1A1_MOUSE^AK1A1_MOUSE^Q:47-1015,H:4-325^49.69%ID^E:1e-106^RecName: Full=Alcohol dehydrogenase [NADP(+)];^Eukaryota; Metazoa; Chordata; Craniata; Vertebrata; Euteleostomi; Mammalia; Eutheria; Euarchontoglires; Glires; Rodentia; Sciurognathi; Muroidea; Muridae; Murinae; Mus; Mus	PF00248.18^Aldo_ket_red^Aldo/keto reductase family^20-293^E:1.7e-50
2	neural + ciliary-bands	CapteG175158	5.21e-176	0.883679	0.22	0	8.57e-172	TOM20_PONAB^TOM20_PONAB^Q:89-385,H:7-101^56.57%ID^E:9e-26^RecName: Full=Mitochondrial import receptor subunit TOM20 homolog;^Eukaryota; Metazoa; Chordata; Craniata; Vertebrata; Euteleostomi; Mammalia; Eutheria; Euarchontoglires; Primates; Haplorrhini; Catarrhini; Hominidae; Pongo	PF02064.12^MAS20^MAS20 protein import receptor^12-129^E:1.3e-42
2	neural + ciliary-bands	CapteG17912	5.21e-176	0.883654	0.22	0	8.57e-172	PRDX6_CHICK^PRDX6_CHICK^Q:25-588,H:32-221^67.37%ID^E:1e-85^RecName: Full=Peroxiredoxin-6;^Eukaryota; Metazoa; Chordata; Craniata; Vertebrata; Euteleostomi; Archelosauria; Archosauria; Dinosauria; Saurischia; Theropoda; Coelurosauria; Aves; Neognathae; Galloanserae; Galliformes; Phasianidae; Phasianinae; Gallus	PF00578.18^AhpC-TSA^AhpC/TSA family^8-119^E:1.4e-23`PF08534.7^Redoxin^Redoxin^11-127^E:3.3e-09`PF10417.6^1-cysPrx_C^C-terminal domain of 1-Cys peroxiredoxin^141-179^E:1.2e-13
2	neural + ciliary-bands	CapteG152540	2.52e-174	0.850915	0.218	0	4.14e-170	MDHC_CHICK^MDHC_CHICK^Q:92-1072,H:1-328^72.34%ID^E:2e-158^RecName: Full=Malate dehydrogenase, cytoplasmic;^Eukaryota; Metazoa; Chordata; Craniata; Vertebrata; Euteleostomi; Archelosauria; Archosauria; Dinosauria; Saurischia; Theropoda; Coelurosauria; Aves; Neognathae; Galloanserae; Galliformes; Phasianidae; Phasianinae; Gallus	PF00056.20^Ldh_1_N^lactate/malate dehydrogenase, NAD binding domain^6-152^E:6.2e-37`PF02866.15^Ldh_1_C^lactate/malate dehydrogenase, alpha/beta C-terminal domain^156-326^E:2.8e-40
2	neural + ciliary-bands	CapteG164026	2.52e-174	0.833151	0.218	0	4.14e-170	DCOR_HUMAN^DCOR_HUMAN^Q:270-1499,H:21-422^56.45%ID^E:2e-149^RecName: Full=Ornithine decarboxylase;^Eukaryota; Metazoa; Chordata; Craniata; Vertebrata; Euteleostomi; Mammalia; Eutheria; Euarchontoglires; Primates; Haplorrhini; Catarrhini; Hominidae; Homo	PF02784.13^Orn_Arg_deC_N^Pyridoxal-dependent decarboxylase, pyridoxal binding domain^46-283^E:2.6e-82`PF00278.19^Orn_DAP_Arg_deC^Pyridoxal-dependent decarboxylase, C-terminal sheet domain^287-410^E:8.4e-35
2	neural + ciliary-bands	CapteG150639	1.19e-170	0.866516	0.216	0	1.96e-166	PP1A_RAT^PP1A_RAT^Q:130-1107,H:1-330^92.12%ID^E:0^RecName: Full=Serine/threonine-protein phosphatase PP1-alpha catalytic subunit;^Eukaryota; Metazoa; Chordata; Craniata; Vertebrata; Euteleostomi; Mammalia; Eutheria; Euarchontoglires; Glires; Rodentia; Sciurognathi; Muroidea; Muridae; Murinae; Rattus	PF16891.2^STPPase_N^Serine-threonine protein phosphatase N-terminal domain^9-56^E:1.1e-23`PF00149.25^Metallophos^Calcineurin-like phosphoesterase^60-249^E:5.7e-39
2	neural + ciliary-bands	CapteG21963	1.03e-170	0.837444	0.216	0	1.7e-166	EIF3M_HUMAN^EIF3M_HUMAN^Q:20-1123,H:1-368^54.59%ID^E:2e-146^RecName: Full=Eukaryotic translation initiation factor 3 subunit M {ECO:0000255|HAMAP-Rule:MF_03012};^Eukaryota; Metazoa; Chordata; Craniata; Vertebrata; Euteleostomi; Mammalia; Eutheria; Euarchontoglires; Primates; Haplorrhini; Catarrhini; Hominidae; Homo	PF13768.3^VWA_3^von Willebrand factor type A domain^141-223^E:0.0086`PF01399.24^PCI^PCI domain^237-335^E:1.6e-14
2	neural + ciliary-bands	CapteG222963	5.85e-171	1.08206	0.214	0	9.62e-167	PDX1_SUBDO^PDX1_SUBDO^Q:144-1010,H:14-302^73.7%ID^E:9e-156^RecName: Full=Pyridoxal 5'-phosphate synthase subunit SNZERR;^Eukaryota; Metazoa; Porifera; Demospongiae; Hadromerida; Suberitidae; Suberites	PF01680.14^SOR_SNZ^SOR/SNZ family^24-229^E:8.8e-107
2	neural + ciliary-bands	CapteG223451	5.85e-171	0.928478	0.214	0	9.62e-167	SRSF3_MOUSE^SRSF3_MOUSE^Q:179-409,H:8-84^68.83%ID^E:3e-31^RecName: Full=Serine/arginine-rich splicing factor 3;^Eukaryota; Metazoa; Chordata; Craniata; Vertebrata; Euteleostomi; Mammalia; Eutheria; Euarchontoglires; Glires; Rodentia; Sciurognathi; Muroidea; Muridae; Murinae; Mus; Mus	PF00076.19^RRM_1^RNA recognition motif. (a.k.a. RRM, RBD, or RNP domain)^14-75^E:2e-18`PF13893.3^RRM_5^RNA recognition motif. (a.k.a. RRM, RBD, or RNP domain)^31-83^E:0.0036
2	neural + ciliary-bands	CapteG153099	5.85e-171	0.915829	0.214	0	9.62e-167	CYB5_DROME^CYB5_DROME^Q:76-438,H:7-128^48.78%ID^E:2e-36^RecName: Full=Cytochrome b5;^Eukaryota; Metazoa; Ecdysozoa; Arthropoda; Hexapoda; Insecta; Pterygota; Neoptera; Endopterygota; Diptera; Brachycera; Muscomorpha; Ephydroidea; Drosophilidae; Drosophila; Sophophora	PF00173.25^Cyt-b5^Cytochrome b5-like Heme/Steroid binding domain^7-78^E:7.7e-24
2	neural + ciliary-bands	CapteG168351	5.85e-171	0.901015	0.214	0	9.62e-167	PFD3_PONAB^PFD3_PONAB^Q:52-570,H:25-197^60.12%ID^E:2e-70^RecName: Full=Prefoldin subunit 3;^Eukaryota; Metazoa; Chordata; Craniata; Vertebrata; Euteleostomi; Mammalia; Eutheria; Euarchontoglires; Primates; Haplorrhini; Catarrhini; Hominidae; Pongo	PF02996.14^Prefoldin^Prefoldin subunit^49-171^E:1.9e-33
2	neural + ciliary-bands	CapteG151106	5.85e-171	0.790244	0.214	0	9.62e-167	SF3B2_HUMAN^SF3B2_HUMAN^Q:331-1893,H:380-895^62.6%ID^E:0^RecName: Full=Splicing factor 3B subunit 2;^Eukaryota; Metazoa; Chordata; Craniata; Vertebrata; Euteleostomi; Mammalia; Eutheria; Euarchontoglires; Primates; Haplorrhini; Catarrhini; Hominidae; Homo	PF04037.10^DUF382^Domain of unknown function (DUF382)^188-313^E:4.9e-59`PF04046.13^PSP^PSP^322-372^E:8.6e-20
2	neural + ciliary-bands	CapteG226906	2.81e-169	1.00032	0.212	0	4.62e-165	ENOPH_BRAFL^ENOPH_BRAFL^Q:358-873,H:122-297^47.16%ID^E:2e-58^RecName: Full=Enolase-phosphatase E1 {ECO:0000255|HAMAP-Rule:MF_03117};^Eukaryota; Metazoa; Chordata; Cephalochordata; Branchiostomidae; Branchiostoma`ENOPH_BRAFL^ENOPH_BRAFL^Q:68-337,H:17-107^46.24%ID^E:2e-58^RecName: Full=Enolase-phosphatase E1 {ECO:0000255|HAMAP-Rule:MF_03117};^Eukaryota; Metazoa; Chordata; Cephalochordata; Branchios…	.
2	neural + ciliary-bands	CapteG170435	3.37e-167	0.846704	0.212	0	5.54e-163	PPID_MOUSE^PPID_MOUSE^Q:6-1097,H:11-370^54.64%ID^E:5e-119^RecName: Full=Peptidyl-prolyl cis-trans isomerase D;^Eukaryota; Metazoa; Chordata; Craniata; Vertebrata; Euteleostomi; Mammalia; Eutheria; Euarchontoglires; Glires; Rodentia; Sciurognathi; Muroidea; Muridae; Murinae; Mus; Mus	PF00160.18^Pro_isomerase^Cyclophilin type peptidyl-prolyl cis-trans isomerase/CLD^15-174^E:2e-49`PF00515.25^TPR_1^Tetratricopeptide repeat^302-335^E:5.5e-07`PF07719.14^TPR_2^Tetratricopeptide repeat^302-335^E:1.2e-05
2	neural + ciliary-bands	CapteG155047	2.81e-169	0.783717	0.212	0	4.62e-165	SMCA4_HUMAN^SMCA4_HUMAN^Q:835-4503,H:326-1566^64.23%ID^E:0^RecName: Full=Transcription activator BRG1;^Eukaryota; Metazoa; Chordata; Craniata; Vertebrata; Euteleostomi; Mammalia; Eutheria; Euarchontoglires; Primates; Haplorrhini; Catarrhini; Hominidae; Homo`SMCA4_HUMAN^SMCA4_HUMAN^Q:397-519,H:170-210^68.29%ID^E:4e-09^RecName: Full=Transcription activator BRG1;^Eukaryota; Metazoa; Chordata; Crania…	PF08880.8^QLQ^QLQ^131-164^E:6.9e-12`PF07529.10^HSA^HSA^412-481^E:3.1e-20`PF07533.13^BRK^BRK domain^572-613^E:8.5e-13`PF00176.20^SNF2_N^SNF2 family N-terminal domain^710-995^E:3.4e-73`PF00270.26^DEAD^DEAD/DEAH box helicase^720-842^E:0.00029`PF11496.5^HDA2-3^Class II histone deacetylase complex subunits 2 and 3^979-1181^E:5.2e-07`PF00271.28^Helicase_C^Helicase conserved C-terminal domain^1025-1138^…
2	neural + ciliary-bands	CapteG167406	1.35e-167	0.867054	0.21	0	2.22e-163	HYPK_MOUSE^HYPK_MOUSE^Q:12-377,H:9-129^52.46%ID^E:1e-28^RecName: Full=Huntingtin-interacting protein K;^Eukaryota; Metazoa; Chordata; Craniata; Vertebrata; Euteleostomi; Mammalia; Eutheria; Euarchontoglires; Glires; Rodentia; Sciurognathi; Muroidea; Muridae; Murinae; Mus; Mus	.
2	neural + ciliary-bands	CapteG163030	6.46e-166	0.861498	0.207	0	1.06e-161	SDHA_DANRE^SDHA_DANRE^Q:1-1806,H:48-661^72.48%ID^E:0^RecName: Full=Succinate dehydrogenase [ubiquinone] flavoprotein subunit, mitochondrial;^Eukaryota; Metazoa; Chordata; Craniata; Vertebrata; Euteleostomi; Actinopterygii; Neopterygii; Teleostei; Ostariophysi; Cypriniformes; Cyprinidae; Danio	PF00890.21^FAD_binding_2^FAD binding domain^1-304^E:1.5e-77`PF02910.17^Succ_DH_flav_C^Fumarate reductase flavoprotein C-term^359-511^E:8.9e-42
2	neural + ciliary-bands	CapteG219669	6.46e-166	0.839765	0.207	0	1.06e-161	NDUS5_PONPY^NDUS5_PONPY^Q:187-378,H:30-96^37.31%ID^E:2e-06^RecName: Full=NADH dehydrogenase [ubiquinone] iron-sulfur protein 5;^Eukaryota; Metazoa; Chordata; Craniata; Vertebrata; Euteleostomi; Mammalia; Eutheria; Euarchontoglires; Primates; Haplorrhini; Catarrhini; Hominidae; Pongo	PF10200.6^Ndufs5^NADH:ubiquinone oxidoreductase, NDUFS5-15kDa^37-97^E:2.6e-10
2	neural + ciliary-bands	CapteG168698	6.46e-166	0.822818	0.207	0	1.06e-161	SF3A2_HUMAN^SF3A2_HUMAN^Q:119-781,H:1-221^82.81%ID^E:9e-101^RecName: Full=Splicing factor 3A subunit 2;^Eukaryota; Metazoa; Chordata; Craniata; Vertebrata; Euteleostomi; Mammalia; Eutheria; Euarchontoglires; Primates; Haplorrhini; Catarrhini; Hominidae; Homo	PF12874.4^zf-met^Zinc-finger of C2H2 type^54-78^E:6.4e-07`PF16835.2^SF3A2^Pre-mRNA-splicing factor SF3a complex subunit 2 (Prp11)^112-206^E:3.1e-39
2	neural + ciliary-bands	CapteG19276	6.18e-164	0.811686	0.207	0	1.02e-159	RPAB3_MOUSE^RPAB3_MOUSE^Q:459-836,H:25-150^79.37%ID^E:2e-65^RecName: Full=DNA-directed RNA polymerases I, II, and III subunit RPABC3;^Eukaryota; Metazoa; Chordata; Craniata; Vertebrata; Euteleostomi; Mammalia; Eutheria; Euarchontoglires; Glires; Rodentia; Sciurognathi; Muroidea; Muridae; Murinae; Mus; Mus	PF03870.12^RNA_pol_Rpb8^RNA polymerase Rpb8^1-111^E:1.1e-36
2	neural + ciliary-bands	CapteG217263	3.09e-164	0.903271	0.205	0	5.07e-160	.	PF09072.7^TMA7^Translation machinery associated TMA7^270-315^E:6.1e-12
2	neural + ciliary-bands	CapteG175255	3.09e-164	0.848102	0.205	0	5.07e-160	SRSF2_PANTR^SRSF2_PANTR^Q:108-398,H:1-97^71.13%ID^E:3e-42^RecName: Full=Serine/arginine-rich splicing factor 2;^Eukaryota; Metazoa; Chordata; Craniata; Vertebrata; Euteleostomi; Mammalia; Eutheria; Euarchontoglires; Primates; Haplorrhini; Catarrhini; Hominidae; Pan	PF00076.19^RRM_1^RNA recognition motif. (a.k.a. RRM, RBD, or RNP domain)^15-84^E:6.1e-21`PF13893.3^RRM_5^RNA recognition motif. (a.k.a. RRM, RBD, or RNP domain)^25-89^E:0.13
2	neural + ciliary-bands	CapteG179064	3.09e-164	0.843549	0.205	0	5.07e-160	ID2_PIG^ID2_PIG^Q:162-353,H:38-103^56.06%ID^E:6e-14^RecName: Full=DNA-binding protein inhibitor ID-2;^Eukaryota; Metazoa; Chordata; Craniata; Vertebrata; Euteleostomi; Mammalia; Eutheria; Laurasiatheria; Cetartiodactyla; Suina; Suidae; Sus	PF00010.23^HLH^Helix-loop-helix DNA-binding domain^32-69^E:1.2e-08
2	neural + ciliary-bands	CapteG173881	3.09e-164	0.837979	0.205	0	5.07e-160	LA_HUMAN^LA_HUMAN^Q:75-1172,H:7-381^40.37%ID^E:3e-64^RecName: Full=Lupus La protein;^Eukaryota; Metazoa; Chordata; Craniata; Vertebrata; Euteleostomi; Mammalia; Eutheria; Euarchontoglires; Primates; Haplorrhini; Catarrhini; Hominidae; Homo	PF05383.14^La^La domain^20-77^E:1.8e-18`PF00076.19^RRM_1^RNA recognition motif. (a.k.a. RRM, RBD, or RNP domain)^118-174^E:2.1e-07`PF08777.8^RRM_3^RNA binding motif^234-337^E:5.7e-21
2	neural + ciliary-bands	CapteG178772	3.09e-164	0.82206	0.205	0	5.07e-160	PSB4_XENLA^PSB4_XENLA^Q:2-652,H:26-242^61.75%ID^E:7e-103^RecName: Full=Proteasome subunit beta type-4;^Eukaryota; Metazoa; Chordata; Craniata; Vertebrata; Euteleostomi; Amphibia; Batrachia; Anura; Pipoidea; Pipidae; Xenopodinae; Xenopus; Xenopus	PF00227.23^Proteasome^Proteasome subunit^1-188^E:2.3e-31
2	neural + ciliary-bands	CapteG164486	1.26e-160	0.821828	0.203	0	2.07e-156	SYK_CRIGR^SYK_CRIGR^Q:394-1926,H:65-575^73.24%ID^E:0^RecName: Full=Lysine--tRNA ligase;^Eukaryota; Metazoa; Chordata; Craniata; Vertebrata; Euteleostomi; Mammalia; Eutheria; Euarchontoglires; Glires; Rodentia; Sciurognathi; Muroidea; Cricetidae; Cricetinae; Cricetulus	PF01336.22^tRNA_anti-codon^OB-fold nucleic acid binding domain^139-218^E:2.2e-13`PF00152.17^tRNA-synt_2^tRNA synthetases class II (D, K and N)^235-586^E:3.8e-79
2	neural + ciliary-bands	CapteG159088	1.26e-160	0.798454	0.203	0	2.07e-156	NOP2_HUMAN^NOP2_HUMAN^Q:607-1836,H:206-612^61.8%ID^E:0^RecName: Full=Probable 28S rRNA (cytosine(4447)-C(5))-methyltransferase;^Eukaryota; Metazoa; Chordata; Craniata; Vertebrata; Euteleostomi; Mammalia; Eutheria; Euarchontoglires; Primates; Haplorrhini; Catarrhini; Hominidae; Homo	PF17125.2^Methyltr_RsmF_N^N-terminal domain of 16S rRNA methyltransferase RsmF^271-359^E:2.2e-08`PF01189.14^Methyltr_RsmB-F^16S rRNA methyltransferase RsmB/F^364-571^E:2.3e-70
2	neural + ciliary-bands	CapteG179128	1.47e-162	0.770199	0.203	0	2.42e-158	G3BP2_PONAB^G3BP2_PONAB^Q:163-570,H:1-138^67.39%ID^E:1e-54^RecName: Full=Ras GTPase-activating protein-binding protein 2;^Eukaryota; Metazoa; Chordata; Craniata; Vertebrata; Euteleostomi; Mammalia; Eutheria; Euarchontoglires; Primates; Haplorrhini; Catarrhini; Hominidae; Pongo`G3BP2_PONAB^G3BP2_PONAB^Q:1186-1458,H:320-411^63.04%ID^E:6e-26^RecName: Full=Ras GTPase-activating protein-binding protei…	PF02136.17^NTF2^Nuclear transport factor 2 (NTF2) domain^11-131^E:6.8e-33`PF00076.19^RRM_1^RNA recognition motif. (a.k.a. RRM, RBD, or RNP domain)^355-412^E:1e-12
2	neural + ciliary-bands	CapteG184443	7.01e-161	0.868562	0.201	0	1.15e-156	PRP19_RAT^PRP19_RAT^Q:33-1556,H:1-504^66.15%ID^E:0^RecName: Full=Pre-mRNA-processing factor 19 {ECO:0000305};^Eukaryota; Metazoa; Chordata; Craniata; Vertebrata; Euteleostomi; Mammalia; Eutheria; Euarchontoglires; Glires; Rodentia; Sciurognathi; Muroidea; Muridae; Murinae; Rattus	PF04564.12^U-box^U-box domain^3-53^E:2e-05`PF08606.8^Prp19^Prp19/Pso4-like^68-133^E:2.7e-32`PF00400.29^WD40^WD domain, G-beta repeat^258-294^E:0.00022`PF00400.29^WD40^WD domain, G-beta repeat^302-331^E:0.039`PF00400.29^WD40^WD domain, G-beta repeat^388-424^E:7.1e-07`PF00400.29^WD40^WD domain, G-beta repeat^469-506^E:0.02
2	neural + ciliary-bands	CapteG167909	7.01e-161	0.806752	0.201	0	1.15e-156	PSA6_MOUSE^PSA6_MOUSE^Q:6-743,H:1-246^77.24%ID^E:2e-145^RecName: Full=Proteasome subunit alpha type-6;^Eukaryota; Metazoa; Chordata; Craniata; Vertebrata; Euteleostomi; Mammalia; Eutheria; Euarchontoglires; Glires; Rodentia; Sciurognathi; Muroidea; Muridae; Murinae; Mus; Mus	PF10584.6^Proteasome_A_N^Proteasome subunit A N-terminal signature^9-31^E:7.1e-15`PF00227.23^Proteasome^Proteasome subunit^34-220^E:4.5e-54
2	neural + ciliary-bands	CapteG221337	7.01e-161	0.783658	0.201	0	1.15e-156	DDX5_HUMAN^DDX5_HUMAN^Q:294-1625,H:33-476^69.82%ID^E:0^RecName: Full=Probable ATP-dependent RNA helicase DDX5;^Eukaryota; Metazoa; Chordata; Craniata; Vertebrata; Euteleostomi; Mammalia; Eutheria; Euarchontoglires; Primates; Haplorrhini; Catarrhini; Hominidae; Homo	PF00270.26^DEAD^DEAD/DEAH box helicase^182-352^E:1e-46`PF04851.12^ResIII^Type III restriction enzyme, res subunit^202-345^E:1.7e-05`PF00271.28^Helicase_C^Helicase conserved C-terminal domain^392-499^E:8.3e-29
2	neural + ciliary-bands	CapteG221883	7.01e-161	0.702517	0.201	0	1.15e-156	.	.
2	neural + ciliary-bands	CapteG159283	3.33e-159	0.857902	0.199	0	5.48e-155	RPN1_MACFA^RPN1_MACFA^Q:161-1882,H:31-607^53.2%ID^E:0^RecName: Full=Dolichyl-diphosphooligosaccharide--protein glycosyltransferase subunit 1;^Eukaryota; Metazoa; Chordata; Craniata; Vertebrata; Euteleostomi; Mammalia; Eutheria; Euarchontoglires; Primates; Haplorrhini; Catarrhini; Cercopithecidae; Cercopithecinae; Macaca	PF04597.11^Ribophorin_I^Ribophorin I^31-451^E:1.5e-145`PF14966.3^DNA_repr_REX1B^DNA repair REX1-B^473-549^E:2.4e-05
2	neural + ciliary-bands	CapteG162465	3.33e-159	0.809632	0.199	0	5.48e-155	SUCB2_PIG^SUCB2_PIG^Q:42-1238,H:23-421^63.91%ID^E:0^RecName: Full=Succinyl-CoA ligase [GDP-forming] subunit beta, mitochondrial;^Eukaryota; Metazoa; Chordata; Craniata; Vertebrata; Euteleostomi; Mammalia; Eutheria; Laurasiatheria; Cetartiodactyla; Suina; Suidae; Sus	PF08442.7^ATP-grasp_2^ATP-grasp domain^2-197^E:2e-67`PF13549.3^ATP-grasp_5^ATP-grasp domain^4-213^E:3.1e-07`PF00549.16^Ligase_CoA^CoA-ligase^258-377^E:4.8e-24
2	neural + ciliary-bands	CapteG178019	1.58e-157	0.867631	0.197	0	2.6e-153	SF3B5_DROME^SF3B5_DROME^Q:66-320,H:1-85^83.53%ID^E:9e-49^RecName: Full=Probable splicing factor 3B subunit 5;^Eukaryota; Metazoa; Ecdysozoa; Arthropoda; Hexapoda; Insecta; Pterygota; Neoptera; Endopterygota; Diptera; Brachycera; Muscomorpha; Ephydroidea; Drosophilidae; Drosophila; Sophophora	PF07189.8^SF3b10^Splicing factor 3B subunit 10 (SF3b10)^3-80^E:1.2e-38
2	neural + ciliary-bands	CapteG176677	1.58e-157	0.821061	0.197	0	2.6e-153	SKP1_XENLA^SKP1_XENLA^Q:71-589,H:1-163^83.33%ID^E:2e-82^RecName: Full=S-phase kinase-associated protein 1;^Eukaryota; Metazoa; Chordata; Craniata; Vertebrata; Euteleostomi; Amphibia; Batrachia; Anura; Pipoidea; Pipidae; Xenopodinae; Xenopus; Xenopus	PF03931.12^Skp1_POZ^Skp1 family, tetramerisation domain^3-33^E:9.3e-12`PF03931.12^Skp1_POZ^Skp1 family, tetramerisation domain^49-77^E:1.6e-09`PF01466.16^Skp1^Skp1 family, dimerisation domain^123-170^E:2.4e-28
2	neural + ciliary-bands	CapteG219817	1.58e-157	0.78819	0.197	0	2.6e-153	.	PF02466.16^Tim17^Tim17/Tim22/Tim23/Pmp24 family^20-121^E:2.5e-07
2	neural + ciliary-bands	CapteG21868	1.58e-157	0.786316	0.197	0	2.6e-153	RUVB1_HUMAN^RUVB1_HUMAN^Q:63-1430,H:1-456^83.99%ID^E:0^RecName: Full=RuvB-like 1;^Eukaryota; Metazoa; Chordata; Craniata; Vertebrata; Euteleostomi; Mammalia; Eutheria; Euarchontoglires; Primates; Haplorrhini; Catarrhini; Hominidae; Homo	PF06068.10^TIP49^TIP49 C-terminus^14-415^E:9e-193`PF05496.9^RuvB_N^Holliday junction DNA helicase ruvB N-terminus^37-91^E:2.8e-07`PF00004.26^AAA^ATPase family associated with various cellular activities (AAA)^66-115^E:1.3e-06
2	neural + ciliary-bands	CapteG170881	7.48e-156	0.778033	0.195	0	1.23e-151	NAA50_XENTR^NAA50_XENTR^Q:70-525,H:2-153^73.68%ID^E:2e-77^RecName: Full=N-alpha-acetyltransferase 50;^Eukaryota; Metazoa; Chordata; Craniata; Vertebrata; Euteleostomi; Amphibia; Batrachia; Anura; Pipoidea; Pipidae; Xenopodinae; Xenopus; Silurana	PF13673.4^Acetyltransf_10^Acetyltransferase (GNAT) domain^44-135^E:6.3e-09`PF00583.22^Acetyltransf_1^Acetyltransferase (GNAT) family^50-130^E:1.8e-16`PF13508.4^Acetyltransf_7^Acetyltransferase (GNAT) domain^50-130^E:1e-09`PF08445.7^FR47^FR47-like protein^76-133^E:1e-05
3	gut secretory cells	CapteG6450	2.81e-281	1.3396	0.423	0.009	4.61e-277	RB22A_HUMAN^RB22A_HUMAN^Q:1-489,H:1-163^62.58%ID^E:1e-69^RecName: Full=Ras-related protein Rab-22A;^Eukaryota; Metazoa; Chordata; Craniata; Vertebrata; Euteleostomi; Mammalia; Eutheria; Euarchontoglires; Primates; Haplorrhini; Catarrhini; Hominidae; Homo	PF00025.18^Arf^ADP-ribosylation factor family^4-126^E:1.1e-12`PF00071.19^Ras^Ras family^7-165^E:1.3e-54`PF08477.10^Roc^Ras of Complex, Roc, domain of DAPkinase^7-121^E:5.5e-35`PF04670.9^Gtr1_RagA^Gtr1/RagA G protein conserved region^7-122^E:2.4e-05
3	gut secretory cells	CapteG188004	3.51e-234	2.85238	0.668	0.082	5.77e-230	.	.
3	gut secretory cells	CapteG200903	1.5e-239	2.26989	0.645	0.07	2.47e-235	.	PF00001.18^7tm_1^7 transmembrane receptor (rhodopsin family)^4-631^E:1.1e-24
3	gut secretory cells	CapteG141885	5.67e-47	2.20672	0.341	0.096	9.31e-43	ACT3_LYTPI^ACT3_LYTPI^Q:1-174,H:114-171^72.41%ID^E:8e-26^RecName: Full=Actin, cytoskeletal 3;^Eukaryota; Metazoa; Echinodermata; Eleutherozoa; Echinozoa; Echinoidea; Euechinoidea; Echinacea; Temnopleuroida; Toxopneustidae; Lytechinus	PF00022.16^Actin^Actin^2-59^E:2.3e-20
3	gut secretory cells	CapteG202336	8.95e-168	2.14051	0.679	0.142	1.47e-163	.	.
3	gut secretory cells	CapteG26326	1.49e-121	2.08998	0.446	0.068	2.44e-117	BLMP1_CAEEL^BLMP1_CAEEL^Q:1-171,H:534-590^43.86%ID^E:2e-11^RecName: Full=B lymphocyte-induced maturation protein 1 homolog {ECO:0000312|WormBase:F25D7.3a};^Eukaryota; Metazoa; Ecdysozoa; Nematoda; Chromadorea; Rhabditida; Rhabditoidea; Rhabditidae; Peloderinae; Caenorhabditis`BLMP1_CAEEL^BLMP1_CAEEL^Q:1-147,H:562-610^36.73%ID^E:7e-07^RecName: Full=B lymphocyte-induced maturation protein 1 homolog…	PF13912.3^zf-C2H2_6^C2H2-type zinc finger^3-12^E:0.063`PF13894.3^zf-C2H2_4^C2H2-type zinc finger^31-50^E:0.0016
3	gut secretory cells	CapteG227442	3.33e-184	2.05463	0.852	0.237	5.48e-180	.	.
3	gut secretory cells	CapteG197407	1.18e-105	2.03661	0.841	0.482	1.94e-101	.	.
3	gut secretory cells	CapteG186947	3.1e-201	2.0111	0.685	0.106	5.09e-197	NRF6_CAEEL^NRF6_CAEEL^Q:949-2214,H:352-789^23.14%ID^E:5e-30^RecName: Full=Nose resistant to fluoxetine protein 6;^Eukaryota; Metazoa; Ecdysozoa; Nematoda; Chromadorea; Rhabditida; Rhabditoidea; Rhabditidae; Peloderinae; Caenorhabditis	.
3	gut secretory cells	CapteG209551	3.62e-176	1.85933	0.631	0.105	5.95e-172	.	.
3	gut secretory cells	CapteG221378	1.3e-260	1.72255	0.534	0.031	2.13e-256	COLQ_TORMA^COLQ_TORMA^Q:902-1288,H:332-471^40.71%ID^E:2e-25^RecName: Full=Acetylcholinesterase collagenic tail peptide;^Eukaryota; Metazoa; Chordata; Craniata; Vertebrata; Chondrichthyes; Elasmobranchii; Batoidea; Torpediniformes; Torpedinidae; Torpedo	PF01391.15^Collagen^Collagen triple helix repeat (20 copies)^152-206^E:9.1e-10`PF01391.15^Collagen^Collagen triple helix repeat (20 copies)^188-242^E:4.9e-09
3	gut secretory cells	CapteG227327	2.96e-125	1.70047	0.673	0.191	4.86e-121	.	PF00612.24^IQ^IQ calmodulin-binding motif^1055-1074^E:0.021`PF00612.24^IQ^IQ calmodulin-binding motif^1089-1106^E:0.066`PF00612.24^IQ^IQ calmodulin-binding motif^1162-1179^E:0.0015
3	gut secretory cells	CapteG227013	1.17e-160	1.68704	0.747	0.173	1.93e-156	.	PF13904.3^DUF4207^Domain of unknown function (DUF4207)^35-306^E:3e-17
3	gut secretory cells	CapteG125228	1.81e-274	1.67984	0.392	0.006	2.98e-270	H4_DENKL^H4_DENKL^Q:49-222,H:44-103^95%ID^E:2e-31^RecName: Full=Histone H4;^Eukaryota; Metazoa; Cnidaria; Anthozoa; Octocorallia; Alcyonacea; Alcyoniina; Nephtheidae; Dendronephthya	.
3	gut secretory cells	CapteG164592	3.49e-126	1.67695	0.705	0.205	5.74e-122	ZSWM8_HUMAN^ZSWM8_HUMAN^Q:304-1806,H:1-497^63.55%ID^E:6e-160^RecName: Full=Zinc finger SWIM domain-containing protein 8;^Eukaryota; Metazoa; Chordata; Craniata; Vertebrata; Euteleostomi; Mammalia; Eutheria; Euarchontoglires; Primates; Haplorrhini; Catarrhini; Hominidae; Homo`ZSWM8_HUMAN^ZSWM8_HUMAN^Q:3421-4071,H:1217-1435^75.8%ID^E:8e-94^RecName: Full=Zinc finger SWIM domain-containing protein 8;…	PF04434.14^SWIM^SWIM zinc finger^168-198^E:0.57
3	gut secretory cells	mir-210	3.41e-54	1.64539	0.364	0.096	5.59e-50
3	gut secretory cells	CapteG221096	6.31e-99	1.63833	0.881	0.555	1.04e-94	PCX1_HUMAN^PCX1_HUMAN^Q:2668-5844,H:946-2069^55.45%ID^E:0^RecName: Full=Pecanex-like protein 1;^Eukaryota; Metazoa; Chordata; Craniata; Vertebrata; Euteleostomi; Mammalia; Eutheria; Euarchontoglires; Primates; Haplorrhini; Catarrhini; Hominidae; Homo`PCX1_HUMAN^PCX1_HUMAN^Q:5962-6273,H:2238-2341^53.85%ID^E:1e-28^RecName: Full=Pecanex-like protein 1;^Eukaryota; Metazoa; Chordata; Craniata; Vertebr…	PF05041.12^Pecanex_C^Pecanex protein (C-terminus)^1651-1876^E:7.6e-113
3	gut secretory cells	CapteG164594	1.05e-109	1.61738	0.42	0.066	1.72e-105	GEMI6_HUMAN^GEMI6_HUMAN^Q:322-786,H:11-159^31.61%ID^E:6e-15^RecName: Full=Gem-associated protein 6;^Eukaryota; Metazoa; Chordata; Craniata; Vertebrata; Euteleostomi; Mammalia; Eutheria; Euarchontoglires; Primates; Haplorrhini; Catarrhini; Hominidae; Homo	PF06372.9^Gemin6^Gemin6 protein^7-171^E:2.2e-26
3	gut secretory cells	CapteG186395	3.88e-121	1.56869	0.94	0.701	6.38e-117	.	.
3	gut secretory cells	CapteG227978	4.84e-107	1.56042	0.844	0.487	7.96e-103	.	.
3	gut secretory cells	CapteG195064	9.36e-125	1.55798	0.807	0.279	1.54e-120	.	.
3	gut secretory cells	CapteG221969	8.48e-109	1.5193	0.756	0.305	1.39e-104	.	PF00057.15^Ldl_recept_a^Low-density lipoprotein receptor domain class A^2004-2038^E:2.8e-10
3	gut secretory cells	CapteG106756	1.09e-215	1.51884	0.548	0.049	1.78e-211	KELC_ANOST^KELC_ANOST^Q:4-696,H:80-308^32.03%ID^E:2e-37^RecName: Full=Ring canal kelch homolog;^Eukaryota; Metazoa; Ecdysozoa; Arthropoda; Hexapoda; Insecta; Pterygota; Neoptera; Endopterygota; Diptera; Nematocera; Culicoidea; Culicidae; Anophelinae; Anopheles	PF00651.28^BTB^BTB/POZ domain^13-117^E:5.4e-22`PF07707.12^BACK^BTB And C-terminal Kelch^128-226^E:1.8e-24
3	gut secretory cells	CapteG204493	9.24e-113	1.51703	0.551	0.115	1.52e-108	SSUH2_MOUSE^SSUH2_MOUSE^Q:1-837,H:72-328^30.07%ID^E:3e-40^RecName: Full=Protein SSUH2 homolog;^Eukaryota; Metazoa; Chordata; Craniata; Vertebrata; Euteleostomi; Mammalia; Eutheria; Euarchontoglires; Glires; Rodentia; Sciurognathi; Muroidea; Muridae; Murinae; Mus; Mus	.
3	gut secretory cells	CapteG225416	1.11e-90	1.4362	0.358	0.055	1.82e-86	ENPP_APLCA^ENPP_APLCA^Q:335-796,H:398-543^35.06%ID^E:5e-07^RecName: Full=Enterin neuropeptides;^Eukaryota; Metazoa; Lophotrochozoa; Mollusca; Gastropoda; Heterobranchia; Euthyneura; Euopisthobranchia; Aplysiomorpha; Aplysioidea; Aplysiidae; Aplysia`ENPP_APLCA^ENPP_APLCA^Q:335-796,H:386-531^34.42%ID^E:9e-07^RecName: Full=Enterin neuropeptides;^Eukaryota; Metazoa; Lophotrochozoa; Mollusca; Gastropo…	.
3	gut secretory cells	CapteG89266	2.01e-189	1.42925	0.588	0.071	3.31e-185	.	.
3	gut secretory cells	CapteG217643	1.11e-239	1.40285	0.46	0.022	1.83e-235	.	.
3	gut secretory cells	CapteG218157	2.54e-155	1.40249	0.29	0.013	4.17e-151	.	.
3	gut secretory cells	CapteG49846	6.8e-89	1.39439	0.795	0.454	1.12e-84	HS3S1_MOUSE^HS3S1_MOUSE^Q:1-261,H:59-145^42.53%ID^E:9e-20^RecName: Full=Heparan sulfate glucosamine 3-O-sulfotransferase 1;^Eukaryota; Metazoa; Chordata; Craniata; Vertebrata; Euteleostomi; Mammalia; Eutheria; Euarchontoglires; Glires; Rodentia; Sciurognathi; Muroidea; Muridae; Murinae; Mus; Mus	PF00685.24^Sulfotransfer_1^Sulfotransferase domain^1-84^E:2e-07
3	gut secretory cells	CapteG92139	2.05e-199	1.39066	0.366	0.016	3.36e-195	PLCL2_HUMAN^PLCL2_HUMAN^Q:115-3114,H:98-1098^56.33%ID^E:0^RecName: Full=Inactive phospholipase C-like protein 2;^Eukaryota; Metazoa; Chordata; Craniata; Vertebrata; Euteleostomi; Mammalia; Eutheria; Euarchontoglires; Primates; Haplorrhini; Catarrhini; Hominidae; Homo	PF16457.2^PH_12^Pleckstrin homology domain^80-193^E:2e-14`PF09279.8^EF-hand_like^Phosphoinositide-specific phospholipase C, efhand-like^277-360^E:2e-15`PF00388.16^PI-PLC-X^Phosphatidylinositol-specific phospholipase C, X domain^370-513^E:1.2e-62`PF00387.16^PI-PLC-Y^Phosphatidylinositol-specific phospholipase C, Y domain^558-673^E:2.7e-42`PF00168.27^C2^C2 domain^695-796^E:7.8e-15
3	gut secretory cells	CapteG223728	4.18e-113	1.36491	0.543	0.117	6.86e-109	.	PF00431.17^CUB^CUB domain^74-174^E:6.5e-07
3	gut secretory cells	CapteG218533	3.77e-173	1.36162	0.318	0.013	6.19e-169	.	.
3	gut secretory cells	tRNA-Cys.7	2.88e-86	1.35797	0.616	0.205	4.74e-82
3	gut secretory cells	CapteG104885	5.78e-83	1.35344	0.713	0.324	9.5e-79	GNRR2_CLAGA^GNRR2_CLAGA^Q:4-891,H:37-326^36.91%ID^E:9e-69^RecName: Full=Gonadotropin-releasing hormone II receptor;^Eukaryota; Metazoa; Chordata; Craniata; Vertebrata; Euteleostomi; Actinopterygii; Neopterygii; Teleostei; Ostariophysi; Siluriformes; Clariidae; Clarias	PF10320.6^7TM_GPCR_Srsx^Serpentine type 7TM GPCR chemoreceptor Srsx^19-296^E:4.3e-11`PF00001.18^7tm_1^7 transmembrane receptor (rhodopsin family)^24-296^E:7.7e-53
3	gut secretory cells	CapteG94424	1.45e-89	1.34344	0.602	0.186	2.39e-85	SLIT1_RAT^SLIT1_RAT^Q:79-621,H:30-204^34.81%ID^E:2e-19^RecName: Full=Slit homolog 1 protein;^Eukaryota; Metazoa; Chordata; Craniata; Vertebrata; Euteleostomi; Mammalia; Eutheria; Euarchontoglires; Glires; Rodentia; Sciurognathi; Muroidea; Muridae; Murinae; Rattus`SLIT1_RAT^SLIT1_RAT^Q:85-582,H:511-671^31.74%ID^E:4e-14^RecName: Full=Slit homolog 1 protein;^Eukaryota; Metazoa; Chordata; Craniata; V…	PF13855.3^LRR_8^Leucine rich repeat^63-120^E:2.5e-14`PF13306.3^LRR_5^Leucine rich repeats (6 copies)^70-130^E:0.0025`PF13855.3^LRR_8^Leucine rich repeat^138-196^E:3.6e-15`PF13306.3^LRR_5^Leucine rich repeats (6 copies)^145-205^E:0.00057
3	gut secretory cells	CapteG205520	5e-90	1.31905	0.702	0.28	8.22e-86	.	.
3	gut secretory cells	CapteG196505	7.24e-162	1.29666	0.489	0.054	1.19e-157	.	.
3	gut secretory cells	CapteG116144	2.61e-173	1.28635	0.446	0.039	4.28e-169	RPA2_HUMAN^RPA2_HUMAN^Q:1-3327,H:35-1134^56.51%ID^E:0^RecName: Full=DNA-directed RNA polymerase I subunit RPA2;^Eukaryota; Metazoa; Chordata; Craniata; Vertebrata; Euteleostomi; Mammalia; Eutheria; Euarchontoglires; Primates; Haplorrhini; Catarrhini; Hominidae; Homo	PF04563.12^RNA_pol_Rpb2_1^RNA polymerase beta subunit^4-377^E:2.7e-41`PF04561.11^RNA_pol_Rpb2_2^RNA polymerase Rpb2, domain 2^154-326^E:2.7e-12`PF04565.13^RNA_pol_Rpb2_3^RNA polymerase Rpb2, domain 3^427-491^E:8.2e-28`PF06883.9^RNA_pol_Rpa2_4^RNA polymerase I, Rpa2 specific domain^535-595^E:2.8e-15`PF00562.25^RNA_pol_Rpb2_6^RNA polymerase Rpb2, domain 6^645-1003^E:8.7e-111`PF04560.17^RNA_pol_Rpb2…
3	gut secretory cells	U11	1.46e-139	1.25236	0.358	0.03	2.4e-135
3	gut secretory cells	CapteG225775	3.8e-191	1.25082	0.5	0.044	6.24e-187	MRP4_HUMAN^MRP4_HUMAN^Q:286-4182,H:20-1297^32.32%ID^E:0^RecName: Full=Multidrug resistance-associated protein 4;^Eukaryota; Metazoa; Chordata; Craniata; Vertebrata; Euteleostomi; Mammalia; Eutheria; Euarchontoglires; Primates; Haplorrhini; Catarrhini; Hominidae; Homo	PF00664.20^ABC_membrane^ABC transporter transmembrane region^173-375^E:5e-16`PF00005.24^ABC_tran^ABC transporter^524-655^E:3.5e-16`PF00664.20^ABC_membrane^ABC transporter transmembrane region^804-1093^E:5.8e-27`PF00005.24^ABC_tran^ABC transporter^1180-1301^E:8.8e-07
3	gut secretory cells	CapteG205940	8.65e-144	1.24298	0.548	0.082	1.42e-139	.	.
3	gut secretory cells	tRNA-Tyr.4	1.2e-172	1.24131	0.443	0.038	1.97e-168
3	gut secretory cells	CapteG148262	1.63e-123	1.22409	0.426	0.057	2.68e-119	ATD1A_DANRE^ATD1A_DANRE^Q:1-1137,H:7-374^53.91%ID^E:1e-136^RecName: Full=ATPase family AAA domain-containing protein 1-A;^Eukaryota; Metazoa; Chordata; Craniata; Vertebrata; Euteleostomi; Actinopterygii; Neopterygii; Teleostei; Ostariophysi; Cypriniformes; Cyprinidae; Danio	PF07728.11^AAA_5^AAA domain (dynein-related subfamily)^89-212^E:5.3e-07`PF05496.9^RuvB_N^Holliday junction DNA helicase ruvB N-terminus^89-160^E:1.7e-05`PF00004.26^AAA^ATPase family associated with various cellular activities (AAA)^90-219^E:4.5e-35
3	gut secretory cells	CapteG130010	1.37e-116	1.22357	0.534	0.099	2.25e-112	LECH_CHICK^LECH_CHICK^Q:274-474,H:137-202^36.76%ID^E:9e-08^RecName: Full=Hepatic lectin;^Eukaryota; Metazoa; Chordata; Craniata; Vertebrata; Euteleostomi; Archelosauria; Archosauria; Dinosauria; Saurischia; Theropoda; Coelurosauria; Aves; Neognathae; Galloanserae; Galliformes; Phasianidae; Phasianinae; Gallus	PF00059.18^Lectin_C^Lectin C-type domain^87-159^E:6.8e-06
3	gut secretory cells	CapteG144758	1.66e-89	1.19713	0.438	0.084	2.72e-85	PUUB_ECOLI^PUUB_ECOLI^Q:1-804,H:154-422^44.98%ID^E:5e-82^RecName: Full=Gamma-glutamylputrescine oxidoreductase;^Bacteria; Proteobacteria; Gammaproteobacteria; Enterobacteriales; Enterobacteriaceae; Escherichia	PF01266.21^DAO^FAD dependent oxidoreductase^2-226^E:1.1e-27
3	gut secretory cells	CapteG193300	5.67e-158	1.18816	0.366	0.025	9.32e-154	.	.
3	gut secretory cells	CapteG167530	6.93e-206	1.18097	0.384	0.017	1.14e-201	GLNA_THEMA^GLNA_THEMA^Q:10-768,H:104-360^34.5%ID^E:6e-33^RecName: Full=Glutamine synthetase;^Bacteria; Thermotogae; Thermotogales; Thermotogaceae; Thermotoga	PF00120.21^Gln-synt_C^Glutamine synthetase, catalytic domain^5-308^E:1.1e-67
3	gut secretory cells	CapteG216992	7.26e-146	1.17156	0.523	0.073	1.19e-141	.	.
3	gut secretory cells	CapteG193240	8.87e-135	1.16953	0.307	0.02	1.46e-130	ZAN_PIG^ZAN_PIG^Q:112-729,H:798-977^22.62%ID^E:7e-06^RecName: Full=Zonadhesin;^Eukaryota; Metazoa; Chordata; Craniata; Vertebrata; Euteleostomi; Mammalia; Eutheria; Laurasiatheria; Cetartiodactyla; Suina; Suidae; Sus	PF00094.22^VWD^von Willebrand factor type D domain^41-188^E:6.5e-05
3	gut secretory cells	CapteG202274	5.18e-75	1.16453	0.54	0.166	8.52e-71	.	.
3	gut secretory cells	CapteG147724	7.65e-130	1.15078	0.42	0.049	1.26e-125	UBIQP_XENLA^UBIQP_XENLA^Q:25-462,H:15-161^46.94%ID^E:7e-41^RecName: Full=Polyubiquitin;^Eukaryota; Metazoa; Chordata; Craniata; Vertebrata; Euteleostomi; Amphibia; Batrachia; Anura; Pipoidea; Pipidae; Xenopodinae; Xenopus; Xenopus`UBIQP_XENLA^UBIQP_XENLA^Q:25-240,H:91-162^48.61%ID^E:1e-16^RecName: Full=Polyubiquitin;^Eukaryota; Metazoa; Chordata; Craniata; Vertebrata; Euteleostomi; Amphibia; Batr…	PF11976.5^Rad60-SLD^Ubiquitin-2 like Rad60 SUMO-like^10-80^E:3.4e-08`PF00240.20^ubiquitin^Ubiquitin family^12-80^E:1.6e-21`PF14560.3^Ubiquitin_2^Ubiquitin-like domain^21-55^E:0.098`PF11976.5^Rad60-SLD^Ubiquitin-2 like Rad60 SUMO-like^85-153^E:9.9e-10`PF00240.20^ubiquitin^Ubiquitin family^87-153^E:2.1e-21`PF14560.3^Ubiquitin_2^Ubiquitin-like domain^95-130^E:0.0035
3	gut secretory cells	CapteG195778	1.3e-169	1.14475	0.44	0.038	2.14e-165	SNX21_MOUSE^SNX21_MOUSE^Q:169-726,H:118-303^37.97%ID^E:1e-30^RecName: Full=Sorting nexin-21 {ECO:0000305};^Eukaryota; Metazoa; Chordata; Craniata; Vertebrata; Euteleostomi; Mammalia; Eutheria; Euarchontoglires; Glires; Rodentia; Sciurognathi; Muroidea; Muridae; Murinae; Mus; Mus	PF00787.21^PX^PX domain^66-169^E:2.4e-13`PF13424.3^TPR_12^Tetratricopeptide repeat^183-243^E:2.8e-08
3	gut secretory cells	CapteG209308	2.32e-142	1.14171	0.443	0.049	3.81e-138	SSR5_HUMAN^SSR5_HUMAN^Q:475-774,H:227-321^33.01%ID^E:5e-07^RecName: Full=Somatostatin receptor type 5;^Eukaryota; Metazoa; Chordata; Craniata; Vertebrata; Euteleostomi; Mammalia; Eutheria; Euarchontoglires; Primates; Haplorrhini; Catarrhini; Hominidae; Homo	PF10328.6^7TM_GPCR_Srx^Serpentine type 7TM GPCR chemoreceptor Srx^29-105^E:0.0002`PF00001.18^7tm_1^7 transmembrane receptor (rhodopsin family)^88-241^E:7.2e-13`PF10320.6^7TM_GPCR_Srsx^Serpentine type 7TM GPCR chemoreceptor Srsx^90-254^E:2.6e-07
3	gut secretory cells	CapteG108783	1.34e-139	1.12371	0.48	0.061	2.2e-135	KLHL8_HUMAN^KLHL8_HUMAN^Q:10-1722,H:37-609^50.26%ID^E:0^RecName: Full=Kelch-like protein 8;^Eukaryota; Metazoa; Chordata; Craniata; Vertebrata; Euteleostomi; Mammalia; Eutheria; Euarchontoglires; Primates; Haplorrhini; Catarrhini; Hominidae; Homo	PF00651.28^BTB^BTB/POZ domain^26-130^E:1e-28`PF11822.5^DUF3342^Domain of unknown function (DUF3342)^41-122^E:2.5e-06`PF07707.12^BACK^BTB And C-terminal Kelch^136-236^E:3.2e-29`PF01344.22^Kelch_1^Kelch motif^282-318^E:1.3e-08`PF13418.3^Kelch_4^Galactose oxidase, central domain^283-317^E:0.0001`PF01344.22^Kelch_1^Kelch motif^320-364^E:1.1e-12`PF01344.22^Kelch_1^Kelch motif^368-412^E:5e-13`PF13964.3…
3	gut secretory cells	CapteG198253	1.99e-101	1.1179	0.548	0.12	3.27e-97	COCA1_HUMAN^COCA1_HUMAN^Q:40-747,H:140-364^25.61%ID^E:4e-11^RecName: Full=Collagen alpha-1(XII) chain;^Eukaryota; Metazoa; Chordata; Craniata; Vertebrata; Euteleostomi; Mammalia; Eutheria; Euarchontoglires; Primates; Haplorrhini; Catarrhini; Hominidae; Homo`COCA1_HUMAN^COCA1_HUMAN^Q:37-612,H:1198-1369^25.39%ID^E:2e-06^RecName: Full=Collagen alpha-1(XII) chain;^Eukaryota; Metazoa; Chordata; Crania…	PF00092.25^VWA^von Willebrand factor type A domain^14-204^E:1.3e-26`PF13519.3^VWA_2^von Willebrand factor type A domain^15-137^E:4e-12
3	gut secretory cells	CapteG223816	6.54e-54	1.1173	0.494	0.178	1.08e-49	.	.
3	gut secretory cells	CapteG189448	9.69e-71	1.11262	0.614	0.2	1.59e-66	CNBD2_MOUSE^CNBD2_MOUSE^Q:661-1053,H:209-348^30.56%ID^E:4e-11^RecName: Full=Cyclic nucleotide-binding domain-containing protein 2;^Eukaryota; Metazoa; Chordata; Craniata; Vertebrata; Euteleostomi; Mammalia; Eutheria; Euarchontoglires; Glires; Rodentia; Sciurognathi; Muroidea; Muridae; Murinae; Mus; Mus	PF00027.26^cNMP_binding^Cyclic nucleotide-binding domain^242-323^E:5.4e-14
3	gut secretory cells	CapteG217188	9.28e-169	1.1125	0.389	0.027	1.52e-164	.	PF03151.13^TPT^Triose-phosphate Transporter family^70-275^E:2.3e-08
3	gut secretory cells	CapteG209626	3.1e-83	1.10857	0.389	0.072	5.1e-79	.	.
3	gut secretory cells	CapteG194141	1.37e-90	1.1064	0.639	0.194	2.25e-86	.	.
3	gut secretory cells	CapteG21898	7.45e-73	1.10247	0.781	0.468	1.22e-68	HSP74_ANOAL^HSP74_ANOAL^Q:92-784,H:3-233^83.55%ID^E:6e-137^RecName: Full=Heat shock protein 70 B2;^Eukaryota; Metazoa; Ecdysozoa; Arthropoda; Hexapoda; Insecta; Pterygota; Neoptera; Endopterygota; Diptera; Nematocera; Culicoidea; Culicidae; Anophelinae; Anopheles`HSP74_ANOAL^HSP74_ANOAL^Q:767-1423,H:406-640^55.08%ID^E:4e-77^RecName: Full=Heat shock protein 70 B2;^Eukaryota; Metazoa; Ecdysozoa; Ar…	PF00012.17^HSP70^Hsp70 protein^8-238^E:1.1e-116`PF06723.10^MreB_Mbl^MreB/Mbl protein^140-228^E:5.4e-09`PF00012.17^HSP70^Hsp70 protein^240-432^E:3.6e-57
3	gut secretory cells	CapteG223083	1.08e-62	1.10241	0.778	0.514	1.78e-58	FCGBP_HUMAN^FCGBP_HUMAN^Q:964-2553,H:312-849^27.53%ID^E:4e-40^RecName: Full=IgGFc-binding protein;^Eukaryota; Metazoa; Chordata; Craniata; Vertebrata; Euteleostomi; Mammalia; Eutheria; Euarchontoglires; Primates; Haplorrhini; Catarrhini; Hominidae; Homo`FCGBP_HUMAN^FCGBP_HUMAN^Q:1369-2550,H:1670-2055^29.48%ID^E:4e-31^RecName: Full=IgGFc-binding protein;^Eukaryota; Metazoa; Chordata; Craniata; Ver…	PF00008.24^EGF^EGF-like domain^422-451^E:0.00021`PF00094.22^VWD^von Willebrand factor type D domain^462-611^E:1.4e-18`PF08742.8^C8^C8 domain^664-739^E:2e-11`PF00008.24^EGF^EGF-like domain^860-890^E:2.3e-07
3	gut secretory cells	CapteG59837	1.37e-77	1.09717	0.688	0.27	2.26e-73	.	PF00078.24^RVT_1^Reverse transcriptase (RNA-dependent DNA polymerase)^9-92^E:3.1e-09
3	gut secretory cells	CapteG220123	4.25e-74	1.09229	0.548	0.159	6.98e-70	PF21A_HUMAN^PF21A_HUMAN^Q:619-1179,H:364-556^42.93%ID^E:3e-37^RecName: Full=PHD finger protein 21A;^Eukaryota; Metazoa; Chordata; Craniata; Vertebrata; Euteleostomi; Mammalia; Eutheria; Euarchontoglires; Primates; Haplorrhini; Catarrhini; Hominidae; Homo`PF21A_HUMAN^PF21A_HUMAN^Q:13-204,H:2-65^62.5%ID^E:3e-14^RecName: Full=PHD finger protein 21A;^Eukaryota; Metazoa; Chordata; Craniata; Vertebrata…	PF00628.26^PHD^PHD-finger^329-372^E:1.1e-11
3	gut secretory cells	CapteG205022	8.03e-84	1.08955	0.938	0.76	1.32e-79	.	.
3	gut secretory cells	CapteG131592	8.35e-118	1.085	0.463	0.07	1.37e-113	NWD1_HUMAN^NWD1_HUMAN^Q:58-645,H:495-689^38.58%ID^E:3e-33^RecName: Full=NACHT domain- and WD repeat-containing protein 1;^Eukaryota; Metazoa; Chordata; Craniata; Vertebrata; Euteleostomi; Mammalia; Eutheria; Euarchontoglires; Primates; Haplorrhini; Catarrhini; Hominidae; Homo	.
3	gut secretory cells	CapteG156675	3.23e-155	1.08099	0.381	0.029	5.31e-151	EMC7_MACFA^EMC7_MACFA^Q:115-630,H:45-215^53.49%ID^E:5e-64^RecName: Full=ER membrane protein complex subunit 7;^Eukaryota; Metazoa; Chordata; Craniata; Vertebrata; Euteleostomi; Mammalia; Eutheria; Euarchontoglires; Primates; Haplorrhini; Catarrhini; Cercopithecidae; Cercopithecinae; Macaca	PF09430.7^DUF2012^Protein of unknown function (DUF2012)^49-160^E:5.1e-32
3	gut secretory cells	CapteG87652	1.2e-116	1.06387	0.457	0.068	1.97e-112	EDIL3_MOUSE^EDIL3_MOUSE^Q:1-336,H:202-314^36.21%ID^E:5e-15^RecName: Full=EGF-like repeat and discoidin I-like domain-containing protein 3;^Eukaryota; Metazoa; Chordata; Craniata; Vertebrata; Euteleostomi; Mammalia; Eutheria; Euarchontoglires; Glires; Rodentia; Sciurognathi; Muroidea; Muridae; Murinae; Mus; Mus`EDIL3_MOUSE^EDIL3_MOUSE^Q:1-336,H:364-476^30.7%ID^E:3e-10^RecName: Full=EGF-like repeat…	PF00754.22^F5_F8_type_C^F5/8 type C domain^2-98^E:1.1e-17
3	gut secretory cells	CapteG194933	7.38e-153	1.06386	0.432	0.042	1.21e-148	ABCB6_XENTR^ABCB6_XENTR^Q:10-1005,H:7-310^33.43%ID^E:7e-40^RecName: Full=ATP-binding cassette sub-family B member 6, mitochondrial;^Eukaryota; Metazoa; Chordata; Craniata; Vertebrata; Euteleostomi; Amphibia; Batrachia; Anura; Pipoidea; Pipidae; Xenopodinae; Xenopus; Silurana	PF16185.2^MTABC_N^Mitochondrial ABC-transporter N-terminal five TM region^4-256^E:4.8e-76
3	gut secretory cells	CapteG188373	2.52e-112	1.06072	0.565	0.115	4.14e-108	.	.
3	gut secretory cells	CapteG223335	8.33e-204	1.05899	0.452	0.029	1.37e-199	TTC5_HUMAN^TTC5_HUMAN^Q:10-1293,H:17-434^45.92%ID^E:5e-118^RecName: Full=Tetratricopeptide repeat protein 5;^Eukaryota; Metazoa; Chordata; Craniata; Vertebrata; Euteleostomi; Mammalia; Eutheria; Euarchontoglires; Primates; Haplorrhini; Catarrhini; Hominidae; Homo	PF13181.3^TPR_8^Tetratricopeptide repeat^102-128^E:0.0018`PF13181.3^TPR_8^Tetratricopeptide repeat^222-252^E:0.00076`PF16669.2^TTC5_OB^Tetratricopeptide repeat protein 5 OB fold domain^316-428^E:1.1e-35
3	gut secretory cells	CapteG207723	5.24e-72	1.05777	0.702	0.321	8.62e-68	ACHA6_HUMAN^ACHA6_HUMAN^Q:37-1377,H:29-483^30.57%ID^E:1e-54^RecName: Full=Neuronal acetylcholine receptor subunit alpha-6;^Eukaryota; Metazoa; Chordata; Craniata; Vertebrata; Euteleostomi; Mammalia; Eutheria; Euarchontoglires; Primates; Haplorrhini; Catarrhini; Hominidae; Homo	PF02931.20^Neur_chan_LBD^Neurotransmitter-gated ion-channel ligand binding domain^21-225^E:1.1e-49`PF02932.13^Neur_chan_memb^Neurotransmitter-gated ion-channel transmembrane region^234-458^E:3.6e-21
3	gut secretory cells	CapteG194765	9.02e-70	1.03026	0.793	0.473	1.48e-65	.	.
3	gut secretory cells	CapteG110139	6.71e-76	1.02797	0.557	0.165	1.1e-71	METN_PHOLL^METN_PHOLL^Q:1-1026,H:1-343^58.6%ID^E:5e-139^RecName: Full=Methionine import ATP-binding protein MetN {ECO:0000255|HAMAP-Rule:MF_01719};^Bacteria; Proteobacteria; Gammaproteobacteria; Enterobacteriales; Enterobacteriaceae; Photorhabdus	PF00005.24^ABC_tran^ABC transporter^22-169^E:8.9e-36`PF09383.7^NIL^NIL domain^268-338^E:1.4e-19
3	gut secretory cells	CapteG224008	3.02e-134	1.02371	0.42	0.047	4.97e-130	CDC45_HUMAN^CDC45_HUMAN^Q:68-1807,H:1-565^46.06%ID^E:2e-172^RecName: Full=Cell division control protein 45 homolog;^Eukaryota; Metazoa; Chordata; Craniata; Vertebrata; Euteleostomi; Mammalia; Eutheria; Euarchontoglires; Primates; Haplorrhini; Catarrhini; Hominidae; Homo	PF02724.11^CDC45^CDC45-like protein^20-576^E:2e-146
3	gut secretory cells	CapteG23488	2.23e-101	1.02061	0.423	0.068	3.67e-97	ACM2_CAEEL^ACM2_CAEEL^Q:22-744,H:6-242^44.63%ID^E:9e-60^RecName: Full=Probable muscarinic acetylcholine receptor gar-2;^Eukaryota; Metazoa; Ecdysozoa; Nematoda; Chromadorea; Rhabditida; Rhabditoidea; Rhabditidae; Peloderinae; Caenorhabditis`ACM2_CAEEL^ACM2_CAEEL^Q:1159-1425,H:537-626^58.06%ID^E:6e-25^RecName: Full=Probable muscarinic acetylcholine receptor gar-2;^Eukaryota; Metazoa; Ecdysozoa; Ne…	PF10328.6^7TM_GPCR_Srx^Serpentine type 7TM GPCR chemoreceptor Srx^16-215^E:4.1e-08`PF10320.6^7TM_GPCR_Srsx^Serpentine type 7TM GPCR chemoreceptor Srsx^20-213^E:6.1e-09`PF00001.18^7tm_1^7 transmembrane receptor (rhodopsin family)^24-454^E:1.7e-64
3	gut secretory cells	CapteG88179	1.02e-49	1.01966	0.457	0.159	1.68e-45	FOXL2_RABIT^FOXL2_RABIT^Q:1-276,H:56-145^82.61%ID^E:1e-49^RecName: Full=Forkhead box protein L2;^Eukaryota; Metazoa; Chordata; Craniata; Vertebrata; Euteleostomi; Mammalia; Eutheria; Euarchontoglires; Glires; Lagomorpha; Leporidae; Oryctolagus	PF00250.15^Forkhead^Forkhead domain^1-82^E:6.9e-39
3	gut secretory cells	CapteG221936	3.95e-91	1.01876	0.642	0.177	6.48e-87	ABCB6_RAT^ABCB6_RAT^Q:4-1566,H:324-836^66.22%ID^E:0^RecName: Full=ATP-binding cassette sub-family B member 6, mitochondrial;^Eukaryota; Metazoa; Chordata; Craniata; Vertebrata; Euteleostomi; Mammalia; Eutheria; Euarchontoglires; Glires; Rodentia; Sciurognathi; Muroidea; Muridae; Murinae; Rattus	PF00664.20^ABC_membrane^ABC transporter transmembrane region^1-229^E:4.9e-31`PF00005.24^ABC_tran^ABC transporter^291-440^E:1.4e-36
3	gut secretory cells	CapteG117355	2.37e-101	1.01283	0.267	0.023	3.9e-97	GLRK_LYMST^GLRK_LYMST^Q:1-525,H:506-689^28.72%ID^E:1e-20^RecName: Full=Glutamate receptor;^Eukaryota; Metazoa; Lophotrochozoa; Mollusca; Gastropoda; Heterobranchia; Euthyneura; Panpulmonata; Hygrophila; Lymnaeoidea; Lymnaeidae; Lymnaea	PF00060.23^Lig_chan^Ligand-gated ion channel^53-158^E:5.2e-19
3	gut secretory cells	CapteG209129	2.49e-57	1.01249	0.784	0.523	4.1e-53	.	PF03645.10^Tctex-1^Tctex-1 family^107-158^E:4.5e-06
3	gut secretory cells	CapteG210443	1.31e-136	1.0079	0.392	0.038	2.15e-132	.	.
3	gut secretory cells	CapteG225423	1.42e-88	1.00721	0.989	0.854	2.33e-84	CEP72_DANRE^CEP72_DANRE^Q:4-447,H:5-152^60.14%ID^E:3e-52^RecName: Full=Centrosomal protein of 72 kDa;^Eukaryota; Metazoa; Chordata; Craniata; Vertebrata; Euteleostomi; Actinopterygii; Neopterygii; Teleostei; Ostariophysi; Cypriniformes; Cyprinidae; Danio	PF14580.3^LRR_9^Leucine-rich repeat^45-155^E:1.9e-14
3	gut secretory cells	CapteG216405	1.31e-157	1.0055	0.321	0.017	2.15e-153	.	.
3	gut secretory cells	CapteG80474	1.4e-64	0.995714	0.901	0.728	2.3e-60	.	.
3	gut secretory cells	CapteG197452	9.93e-144	0.995483	0.406	0.039	1.63e-139	.	.
3	gut secretory cells	CapteG227011	4.29e-68	0.987778	0.83	0.583	7.05e-64	WRIP1_HUMAN^WRIP1_HUMAN^Q:235-1476,H:224-660^55.25%ID^E:9e-154^RecName: Full=ATPase WRNIP1;^Eukaryota; Metazoa; Chordata; Craniata; Vertebrata; Euteleostomi; Mammalia; Eutheria; Euarchontoglires; Primates; Haplorrhini; Catarrhini; Hominidae; Homo	PF13913.3^zf-C2HC_2^zinc-finger of a C2HC-type^8-29^E:0.09`PF05496.9^RuvB_N^Holliday junction DNA helicase ruvB N-terminus^83-213^E:1.1e-16`PF00004.26^AAA^ATPase family associated with various cellular activities (AAA)^119-230^E:5.9e-17`PF07728.11^AAA_5^AAA domain (dynein-related subfamily)^119-213^E:3.2e-07`PF13173.3^AAA_14^AAA domain^119-238^E:1e-06`PF16193.2^AAA_assoc_2^AAA C-terminal domain^2…
3	gut secretory cells	CapteG126232	1.4e-190	0.987328	0.341	0.013	2.29e-186	TAUC_ECOLI^TAUC_ECOLI^Q:43-789,H:21-272^51.98%ID^E:9e-63^RecName: Full=Taurine transport system permease protein TauC;^Bacteria; Proteobacteria; Gammaproteobacteria; Enterobacteriales; Enterobacteriaceae; Escherichia	PF00528.19^BPD_transp_1^Binding-protein-dependent transport system inner membrane component^89-258^E:1.7e-24
3	gut secretory cells	CapteG217112	1.64e-87	0.971343	0.96	0.834	2.69e-83	.	.
3	gut secretory cells	CapteG94008	2.9e-149	0.967808	0.341	0.023	4.76e-145	CDC42_AEDAE^CDC42_AEDAE^Q:13-558,H:4-185^50%ID^E:2e-60^RecName: Full=Cdc42 homolog;^Eukaryota; Metazoa; Ecdysozoa; Arthropoda; Hexapoda; Insecta; Pterygota; Neoptera; Endopterygota; Diptera; Nematocera; Culicoidea; Culicidae; Culicinae; Aedini; Aedes; Stegomyia	PF00025.18^Arf^ADP-ribosylation factor family^3-171^E:3.6e-05`PF00071.19^Ras^Ras family^6-178^E:7.7e-44`PF08477.10^Roc^Ras of Complex, Roc, domain of DAPkinase^6-119^E:1.7e-18
3	gut secretory cells	CapteG198758	1.91e-195	0.967145	0.372	0.017	3.13e-191	.	.
3	gut secretory cells	CapteG193199	5.34e-67	0.965841	0.881	0.701	8.77e-63	.	.
3	gut secretory cells	CapteG125307	3.33e-61	0.964051	0.565	0.203	5.47e-57	KLD8B_BOVIN^KLD8B_BOVIN^Q:1-546,H:11-203^31.63%ID^E:6e-18^RecName: Full=Kelch domain-containing protein 8B;^Eukaryota; Metazoa; Chordata; Craniata; Vertebrata; Euteleostomi; Mammalia; Eutheria; Laurasiatheria; Cetartiodactyla; Ruminantia; Pecora; Bovidae; Bovinae; Bos`KLD8B_BOVIN^KLD8B_BOVIN^Q:1-375,H:155-294^30.71%ID^E:1e-08^RecName: Full=Kelch domain-containing protein 8B;^Eukaryota; Metazoa; C…	PF13854.3^Kelch_5^Kelch motif^7-33^E:5.3e-06`PF01344.22^Kelch_1^Kelch motif^10-54^E:3.3e-12`PF13964.3^Kelch_6^Kelch motif^10-55^E:2.5e-08`PF13418.3^Kelch_4^Galactose oxidase, central domain^10-54^E:8e-05`PF01344.22^Kelch_1^Kelch motif^105-138^E:7.8e-09`PF13964.3^Kelch_6^Kelch motif^105-141^E:3.6e-08
3	gut secretory cells	CapteG218039	3.68e-131	0.956798	0.361	0.033	6.04e-127	.	.
3	gut secretory cells	CapteG223926	1.61e-86	0.955931	0.259	0.027	2.64e-82	AN32B_CHICK^AN32B_CHICK^Q:472-786,H:52-166^38.79%ID^E:1e-07^RecName: Full=Acidic leucine-rich nuclear phosphoprotein 32 family member B;^Eukaryota; Metazoa; Chordata; Craniata; Vertebrata; Euteleostomi; Archelosauria; Archosauria; Dinosauria; Saurischia; Theropoda; Coelurosauria; Aves; Neognathae; Galloanserae; Galliformes; Phasianidae; Phasianinae; Gallus	.
3	gut secretory cells	CapteG180920	8.44e-95	0.952345	0.435	0.076	1.39e-90	DPTOR_HUMAN^DPTOR_HUMAN^Q:42-617,H:30-221^36.6%ID^E:1e-31^RecName: Full=DEP domain-containing mTOR-interacting protein;^Eukaryota; Metazoa; Chordata; Craniata; Vertebrata; Euteleostomi; Mammalia; Eutheria; Euarchontoglires; Primates; Haplorrhini; Catarrhini; Hominidae; Homo`DPTOR_HUMAN^DPTOR_HUMAN^Q:894-1193,H:308-407^42%ID^E:8e-18^RecName: Full=DEP domain-containing mTOR-interacting protein;^Euk…	PF00610.18^DEP^Domain found in Dishevelled, Egl-10, and Pleckstrin (DEP)^34-100^E:6.5e-12`PF00610.18^DEP^Domain found in Dishevelled, Egl-10, and Pleckstrin (DEP)^138-199^E:3.5e-07
3	gut secretory cells	CapteG227712	6.19e-77	0.948384	0.92	0.753	1.02e-72	SLIT2_MOUSE^SLIT2_MOUSE^Q:799-1023,H:886-956^36%ID^E:6e-06^RecName: Full=Slit homolog 2 protein;^Eukaryota; Metazoa; Chordata; Craniata; Vertebrata; Euteleostomi; Mammalia; Eutheria; Euarchontoglires; Glires; Rodentia; Sciurognathi; Muroidea; Muridae; Murinae; Mus; Mus	PF00008.24^EGF^EGF-like domain^295-325^E:9.6e-07`PF12661.4^hEGF^Human growth factor-like EGF^315-327^E:0.051
3	gut secretory cells	CapteG172679	2.14e-88	0.947741	0.324	0.044	3.51e-84	NFI1L_DANRE^NFI1L_DANRE^Q:69-698,H:3-198^38.1%ID^E:2e-24^RecName: Full=NEDD4 family-interacting protein 1-like;^Eukaryota; Metazoa; Chordata; Craniata; Vertebrata; Euteleostomi; Actinopterygii; Neopterygii; Teleostei; Ostariophysi; Cypriniformes; Cyprinidae; Danio	.
3	gut secretory cells	CapteG70794	2.37e-77	0.940887	0.957	0.838	3.9e-73	GLR1_CAEEL^GLR1_CAEEL^Q:1-201,H:659-725^43.28%ID^E:2e-12^RecName: Full=Glutamate receptor 1 {ECO:0000312|WormBase:C06E1.4};^Eukaryota; Metazoa; Ecdysozoa; Nematoda; Chromadorea; Rhabditida; Rhabditoidea; Rhabditidae; Peloderinae; Caenorhabditis	PF00060.23^Lig_chan^Ligand-gated ion channel^1-50^E:8.3e-12
3	gut secretory cells	CapteG214489	9.72e-98	0.939097	0.511	0.104	1.6e-93	.	.
3	gut secretory cells	CapteG207566	4.92e-110	0.936696	0.412	0.057	8.09e-106	.	.
3	gut secretory cells	CapteG191891	1.46e-25	0.93504	0.298	0.113	2.39e-21	.	.
3	gut secretory cells	tRNA-Ser.72	3.44e-115	0.934287	0.338	0.034	5.65e-111
3	gut secretory cells	CapteG170709	1.46e-82	0.929485	0.386	0.069	2.4e-78	CCZ1_CHICK^CCZ1_CHICK^Q:46-1014,H:30-356^48.02%ID^E:2e-121^RecName: Full=Vacuolar fusion protein CCZ1 homolog;^Eukaryota; Metazoa; Chordata; Craniata; Vertebrata; Euteleostomi; Archelosauria; Archosauria; Dinosauria; Saurischia; Theropoda; Coelurosauria; Aves; Neognathae; Galloanserae; Galliformes; Phasianidae; Phasianinae; Gallus`CCZ1_CHICK^CCZ1_CHICK^Q:1022-1348,H:365-472^58.93%ID^E:2e-121^RecN…	PF08217.8^DUF1712^Fungal domain of unknown function (DUF1712)^8-340^E:4.1e-64
3	gut secretory cells	tRNA-Arg.49	1.46e-89	0.925747	0.565	0.14	2.39e-85
3	gut secretory cells	CapteG72200	8.54e-57	0.920913	0.622	0.272	1.4e-52	FBP1_STRPU^FBP1_STRPU^Q:7-687,H:367-592^47.14%ID^E:3e-60^RecName: Full=Fibropellin-1;^Eukaryota; Metazoa; Echinodermata; Eleutherozoa; Echinozoa; Echinoidea; Euechinoidea; Echinacea; Echinoida; Strongylocentrotidae; Strongylocentrotus`FBP1_STRPU^FBP1_STRPU^Q:7-684,H:443-667^48.02%ID^E:6e-60^RecName: Full=Fibropellin-1;^Eukaryota; Metazoa; Echinodermata; Eleutherozoa; Echinozoa; Echinoidea; Euechi…	PF00008.24^EGF^EGF-like domain^6-36^E:1.9e-06`PF00008.24^EGF^EGF-like domain^44-73^E:5.8e-08`PF12661.4^hEGF^Human growth factor-like EGF^63-75^E:0.0045`PF00008.24^EGF^EGF-like domain^82-105^E:2.1e-07`PF00008.24^EGF^EGF-like domain^158-188^E:1.9e-09`PF00008.24^EGF^EGF-like domain^197-227^E:4.9e-08
3	gut secretory cells	CapteG168411	1.14e-106	0.919334	0.412	0.06	1.87e-102	IFT80_HUMAN^IFT80_HUMAN^Q:1-1251,H:346-762^59.71%ID^E:0^RecName: Full=Intraflagellar transport protein 80 homolog;^Eukaryota; Metazoa; Chordata; Craniata; Vertebrata; Euteleostomi; Mammalia; Eutheria; Euarchontoglires; Primates; Haplorrhini; Catarrhini; Hominidae; Homo	.
3	gut secretory cells	CapteG217346	5.44e-180	0.917628	0.366	0.019	8.94e-176	FLP_STAAU^FLP_STAAU^Q:1-1137,H:9-352^24.23%ID^E:5e-20^RecName: Full=Protein flp;^Bacteria; Firmicutes; Bacilli; Bacillales; Staphylococcus	PF00144.21^Beta-lactamase^Beta-lactamase^44-383^E:2e-51
3	gut secretory cells	CapteG146391	1.36e-68	0.917259	0.935	0.815	2.24e-64	MCMBP_XENLA^MCMBP_XENLA^Q:1-1866,H:1-615^44.43%ID^E:3e-171^RecName: Full=Mini-chromosome maintenance complex-binding protein;^Eukaryota; Metazoa; Chordata; Craniata; Vertebrata; Euteleostomi; Amphibia; Batrachia; Anura; Pipoidea; Pipidae; Xenopodinae; Xenopus; Xenopus	PF09739.6^MCM_bind^Mini-chromosome maintenance replisome factor^35-622^E:3.3e-194
3	gut secretory cells	CapteG202798	3.29e-63	0.915774	0.92	0.801	5.41e-59	URAD_BOVIN^URAD_BOVIN^Q:13-543,H:1-168^42.94%ID^E:4e-40^RecName: Full=2-oxo-4-hydroxy-4-carboxy-5-ureidoimidazoline decarboxylase;^Eukaryota; Metazoa; Chordata; Craniata; Vertebrata; Euteleostomi; Mammalia; Eutheria; Laurasiatheria; Cetartiodactyla; Ruminantia; Pecora; Bovidae; Bovinae; Bos	PF09349.7^OHCU_decarbox^OHCU decarboxylase^12-176^E:2.9e-35
3	gut secretory cells	CapteG202265	5.51e-76	0.914739	0.384	0.073	9.06e-72	MRRP1_DROME^MRRP1_DROME^Q:13-819,H:57-338^23.53%ID^E:2e-07^RecName: Full=Mitochondrial ribonuclease P protein 1 homolog;^Eukaryota; Metazoa; Ecdysozoa; Arthropoda; Hexapoda; Insecta; Pterygota; Neoptera; Endopterygota; Diptera; Brachycera; Muscomorpha; Ephydroidea; Drosophilidae; Drosophila; Sophophora	.
3	gut secretory cells	CapteG131383	8.78e-71	0.910325	0.58	0.179	1.44e-66	.	.
3	gut secretory cells	CapteG194950	1.78e-84	0.909744	0.983	0.844	2.93e-80	.	.
3	gut secretory cells	CapteG201376	6.89e-59	0.909153	0.634	0.28	1.13e-54	.	.
3	gut secretory cells	CapteG189274	3.96e-61	0.909099	0.744	0.43	6.51e-57	.	.
3	gut secretory cells	CapteG145963	8.75e-61	0.905944	0.889	0.758	1.44e-56	.	.
3	gut secretory cells	CapteG48467	1.01e-56	0.90558	0.895	0.742	1.67e-52	H1D_STRPU^H1D_STRPU^Q:123-341,H:36-105^54.79%ID^E:4e-16^RecName: Full=Histone H1-delta;^Eukaryota; Metazoa; Echinodermata; Eleutherozoa; Echinozoa; Echinoidea; Euechinoidea; Echinacea; Echinoida; Strongylocentrotidae; Strongylocentrotus	PF00538.16^Linker_histone^linker histone H1 and H5 family^25-98^E:2.7e-27
3	gut secretory cells	CapteG204499	5.2e-68	0.904301	0.96	0.824	8.55e-64	FGD4_RAT^FGD4_RAT^Q:505-1629,H:201-625^29.53%ID^E:1e-49^RecName: Full=FYVE, RhoGEF and PH domain-containing protein 4;^Eukaryota; Metazoa; Chordata; Craniata; Vertebrata; Euteleostomi; Mammalia; Eutheria; Euarchontoglires; Glires; Rodentia; Sciurognathi; Muroidea; Muridae; Murinae; Rattus	PF00621.17^RhoGEF^RhoGEF domain^179-356^E:1.3e-29`PF01363.18^FYVE^FYVE zinc finger^470-535^E:3.7e-10
3	gut secretory cells	CapteG39518	5.11e-75	0.899488	0.966	0.818	8.4e-71	TM169_BOVIN^TM169_BOVIN^Q:1-396,H:153-284^47.73%ID^E:1e-27^RecName: Full=Transmembrane protein 169;^Eukaryota; Metazoa; Chordata; Craniata; Vertebrata; Euteleostomi; Mammalia; Eutheria; Laurasiatheria; Cetartiodactyla; Ruminantia; Pecora; Bovidae; Bovinae; Bos	PF15052.3^TMEM169^TMEM169 protein family^2-124^E:1.8e-52
3	gut secretory cells	CapteG97889	2.12e-64	0.897701	0.591	0.209	3.49e-60	ST1C4_HUMAN^ST1C4_HUMAN^Q:10-795,H:36-299^33.46%ID^E:7e-44^RecName: Full=Sulfotransferase 1C4;^Eukaryota; Metazoa; Chordata; Craniata; Vertebrata; Euteleostomi; Mammalia; Eutheria; Euarchontoglires; Primates; Haplorrhini; Catarrhini; Hominidae; Homo	PF00685.24^Sulfotransfer_1^Sulfotransferase domain^13-255^E:7.3e-59
3	gut secretory cells	CapteG25340	3.73e-82	0.897498	0.506	0.117	6.12e-78	B3GT2_PONAB^B3GT2_PONAB^Q:1-663,H:146-344^32.13%ID^E:1e-27^RecName: Full=Beta-1,3-galactosyltransferase 2;^Eukaryota; Metazoa; Chordata; Craniata; Vertebrata; Euteleostomi; Mammalia; Eutheria; Euarchontoglires; Primates; Haplorrhini; Catarrhini; Hominidae; Pongo	PF01762.18^Galactosyl_T^Galactosyltransferase^21-123^E:5.6e-19`PF01762.18^Galactosyl_T^Galactosyltransferase^154-234^E:9.5e-11
3	gut secretory cells	CapteG226531	8.65e-71	0.897276	0.31	0.05	1.42e-66	.	PF00011.18^HSP20^Hsp20/alpha crystallin family^426-503^E:1.7e-08
3	gut secretory cells	CapteG221789	9.61e-62	0.89434	0.835	0.607	1.58e-57	.	.
3	gut secretory cells	CapteG192675	1.41e-81	0.893349	0.506	0.118	2.31e-77	LECM2_ERYPO^LECM2_ERYPO^Q:262-681,H:25-158^30.07%ID^E:2e-10^RecName: Full=C-type lectin lectoxin-Lio2;^Eukaryota; Metazoa; Chordata; Craniata; Vertebrata; Euteleostomi; Lepidosauria; Squamata; Bifurcata; Unidentata; Episquamata; Toxicofera; Serpentes; Colubroidea; Dipsadidae; Erythrolamprus	PF00059.18^Lectin_C^Lectin C-type domain^109-222^E:2.8e-11
3	gut secretory cells	CapteG214483	6.42e-65	0.890693	0.543	0.169	1.05e-60	.	.
3	gut secretory cells	CapteG199025	3.48e-94	0.890184	0.435	0.076	5.72e-90	.	.
3	gut secretory cells	CapteG141690	8.67e-95	0.889171	0.489	0.097	1.42e-90	RSF1_HUMAN^RSF1_HUMAN^Q:4-108,H:906-940^80%ID^E:2e-17^RecName: Full=Remodeling and spacing factor 1;^Eukaryota; Metazoa; Chordata; Craniata; Vertebrata; Euteleostomi; Mammalia; Eutheria; Euarchontoglires; Primates; Haplorrhini; Catarrhini; Hominidae; Homo	PF00628.26^PHD^PHD-finger^2-35^E:3.5e-09
3	gut secretory cells	CapteG19313	4.48e-68	0.886833	0.946	0.842	7.36e-64	CLCA_MOUSE^CLCA_MOUSE^Q:106-783,H:28-233^37.7%ID^E:2e-40^RecName: Full=Clathrin light chain A;^Eukaryota; Metazoa; Chordata; Craniata; Vertebrata; Euteleostomi; Mammalia; Eutheria; Euarchontoglires; Glires; Rodentia; Sciurognathi; Muroidea; Muridae; Murinae; Mus; Mus	PF01086.14^Clathrin_lg_ch^Clathrin light chain^2-241^E:2.3e-48
3	gut secretory cells	CapteG203966	4.57e-62	0.885976	0.929	0.779	7.51e-58	RNF26_MOUSE^RNF26_MOUSE^Q:1063-1314,H:337-424^37.08%ID^E:7e-10^RecName: Full=Ring finger protein 26;^Eukaryota; Metazoa; Chordata; Craniata; Vertebrata; Euteleostomi; Mammalia; Eutheria; Euarchontoglires; Glires; Rodentia; Sciurognathi; Muroidea; Muridae; Murinae; Mus; Mus	PF13920.3^zf-C3HC4_3^Zinc finger, C3HC4 type (RING finger)^381-433^E:5.4e-14
3	gut secretory cells	CapteG124859	4.54e-75	0.884529	0.543	0.146	7.46e-71	FUCT1_MOUSE^FUCT1_MOUSE^Q:4-981,H:38-361^42.51%ID^E:4e-78^RecName: Full=GDP-fucose transporter 1;^Eukaryota; Metazoa; Chordata; Craniata; Vertebrata; Euteleostomi; Mammalia; Eutheria; Euarchontoglires; Glires; Rodentia; Sciurognathi; Muroidea; Muridae; Murinae; Mus; Mus	PF03151.13^TPT^Triose-phosphate Transporter family^3-300^E:3.7e-17`PF00892.17^EamA^EamA-like transporter family^160-298^E:1e-07
3	gut secretory cells	CapteG188251	1.17e-117	0.884479	0.412	0.053	1.93e-113	FMAR_DROME^FMAR_DROME^Q:80-1078,H:103-435^24.07%ID^E:9e-16^RecName: Full=FMRFamide receptor;^Eukaryota; Metazoa; Ecdysozoa; Arthropoda; Hexapoda; Insecta; Pterygota; Neoptera; Endopterygota; Diptera; Brachycera; Muscomorpha; Ephydroidea; Drosophilidae; Drosophila; Sophophora	.
3	gut secretory cells	CapteG228240	1.23e-49	0.883007	0.864	0.712	2.03e-45	KSR2_HUMAN^KSR2_HUMAN^Q:382-1599,H:568-949^42.75%ID^E:4e-99^RecName: Full=Kinase suppressor of Ras 2;^Eukaryota; Metazoa; Chordata; Craniata; Vertebrata; Euteleostomi; Mammalia; Eutheria; Euarchontoglires; Primates; Haplorrhini; Catarrhini; Hominidae; Homo	PF07714.14^Pkinase_Tyr^Protein tyrosine kinase^246-509^E:5e-57`PF00069.22^Pkinase^Protein kinase domain^248-508^E:5e-48`PF14531.3^Kinase-like^Kinase-like^341-464^E:6e-07
3	gut secretory cells	CapteG204434	1.66e-74	0.882987	0.96	0.832	2.73e-70	AGT2_BOVIN^AGT2_BOVIN^Q:1-1380,H:48-505^58.26%ID^E:0^RecName: Full=Alanine--glyoxylate aminotransferase 2, mitochondrial;^Eukaryota; Metazoa; Chordata; Craniata; Vertebrata; Euteleostomi; Mammalia; Eutheria; Laurasiatheria; Cetartiodactyla; Ruminantia; Pecora; Bovidae; Bovinae; Bos	PF00202.18^Aminotran_3^Aminotransferase class-III^39-460^E:6.2e-94
3	gut secretory cells	CapteG200437	9.27e-62	0.882093	0.832	0.6	1.52e-57	.	.
3	gut secretory cells	CapteG201458	6.2e-66	0.880123	0.963	0.829	1.02e-61	.	.
3	gut secretory cells	CapteG199877	1.35e-73	0.877738	0.435	0.096	2.21e-69	.	.
3	gut secretory cells	CapteG222268	1.07e-76	0.877693	0.986	0.835	1.75e-72	.	.
3	gut secretory cells	CapteG199340	1.41e-67	0.874958	0.952	0.823	2.32e-63	.	.
3	gut secretory cells	CapteG130025	2.53e-80	0.872124	0.994	0.858	4.16e-76	HGF_HUMAN^HGF_HUMAN^Q:13-366,H:173-283^44.92%ID^E:8e-26^RecName: Full=Hepatocyte growth factor;^Eukaryota; Metazoa; Chordata; Craniata; Vertebrata; Euteleostomi; Mammalia; Eutheria; Euarchontoglires; Primates; Haplorrhini; Catarrhini; Hominidae; Homo`HGF_HUMAN^HGF_HUMAN^Q:4-384,H:253-383^38.85%ID^E:1e-20^RecName: Full=Hepatocyte growth factor;^Eukaryota; Metazoa; Chordata; Craniata; Vertebrata; E…	PF00051.15^Kringle^Kringle domain^5-38^E:1.5e-09`PF00051.15^Kringle^Kringle domain^46-128^E:1.5e-18
3	gut secretory cells	CapteG44911	1.47e-66	0.871572	0.974	0.845	2.41e-62	ACSA_ALKEH^ACSA_ALKEH^Q:1-1065,H:109-463^74.65%ID^E:0^RecName: Full=Acetyl-coenzyme A synthetase {ECO:0000255|HAMAP-Rule:MF_01123};^Bacteria; Proteobacteria; Gammaproteobacteria; Chromatiales; Ectothiorhodospiraceae; Alkalilimnicola	PF00501.25^AMP-binding^AMP-binding enzyme^1-355^E:3.4e-73
3	gut secretory cells	CapteG226530	2.65e-64	0.871437	0.972	0.837	4.35e-60	.	PF00011.18^HSP20^Hsp20/alpha crystallin family^426-503^E:7.5e-09
3	gut secretory cells	CapteG149052	3.86e-81	0.869299	0.44	0.092	6.35e-77	PNPO_RAT^PNPO_RAT^Q:99-788,H:32-261^54.11%ID^E:2e-82^RecName: Full=Pyridoxine-5'-phosphate oxidase;^Eukaryota; Metazoa; Chordata; Craniata; Vertebrata; Euteleostomi; Mammalia; Eutheria; Euarchontoglires; Glires; Rodentia; Sciurognathi; Muroidea; Muridae; Murinae; Rattus	PF12766.4^Pyridox_oxase_2^Pyridoxamine 5'-phosphate oxidase^35-120^E:3.2e-06`PF01243.17^Pyridox_oxidase^Pyridoxamine 5'-phosphate oxidase^48-126^E:2.7e-25`PF10590.6^PNPOx_C^Pyridoxine 5'-phosphate oxidase C-terminal dimerisation region^180-234^E:4.4e-19
3	gut secretory cells	CapteG164759	5.16e-61	0.867825	0.957	0.856	8.48e-57	CAPSL_MOUSE^CAPSL_MOUSE^Q:10-588,H:14-206^62.69%ID^E:5e-74^RecName: Full=Calcyphosin-like protein;^Eukaryota; Metazoa; Chordata; Craniata; Vertebrata; Euteleostomi; Mammalia; Eutheria; Euarchontoglires; Glires; Rodentia; Sciurognathi; Muroidea; Muridae; Murinae; Mus; Mus	PF13499.3^EF-hand_7^EF-hand domain pair^35-93^E:1.9e-07`PF13833.3^EF-hand_8^EF-hand domain pair^47-93^E:4.9e-05`PF13405.3^EF-hand_6^EF-hand domain^70-94^E:1.9e-06`PF13499.3^EF-hand_7^EF-hand domain pair^70-129^E:1.3e-11`PF13202.3^EF-hand_5^EF hand^70-91^E:0.0001`PF00036.29^EF-hand_1^EF hand^71-94^E:2.1e-06`PF13202.3^EF-hand_5^EF hand^107-128^E:0.002`PF13833.3^EF-hand_8^EF-hand domain pair^117-173…
3	gut secretory cells	CapteG129043	3.32e-129	0.867471	0.304	0.021	5.46e-125	C560_CRIGR^C560_CRIGR^Q:4-369,H:46-168^40.48%ID^E:2e-13^RecName: Full=Succinate dehydrogenase cytochrome b560 subunit, mitochondrial;^Eukaryota; Metazoa; Chordata; Craniata; Vertebrata; Euteleostomi; Mammalia; Eutheria; Euarchontoglires; Glires; Rodentia; Sciurognathi; Muroidea; Cricetidae; Cricetinae; Cricetulus	PF01127.19^Sdh_cyt^Succinate dehydrogenase/Fumarate reductase transmembrane subunit^4-119^E:8.2e-29
3	gut secretory cells	CapteG126237	5.82e-53	0.864829	0.869	0.69	9.55e-49	FCNV1_VARKO^FCNV1_VARKO^Q:1-159,H:119-171^58.49%ID^E:4e-13^RecName: Full=Veficolin-1;^Eukaryota; Metazoa; Chordata; Craniata; Vertebrata; Euteleostomi; Lepidosauria; Squamata; Bifurcata; Unidentata; Episquamata; Toxicofera; Anguimorpha; Paleoanguimorpha; Varanoidea; Varanidae; Varanus	PF00147.15^Fibrinogen_C^Fibrinogen beta and gamma chains, C-terminal globular domain^1-51^E:1.4e-12
3	gut secretory cells	CapteG216053	1.81e-70	0.863639	0.972	0.846	2.97e-66	.	.
3	gut secretory cells	CapteG163094	2.32e-69	0.863479	0.966	0.821	3.81e-65	FBX28_BOVIN^FBX28_BOVIN^Q:34-831,H:61-324^45.15%ID^E:2e-68^RecName: Full=F-box only protein 28;^Eukaryota; Metazoa; Chordata; Craniata; Vertebrata; Euteleostomi; Mammalia; Eutheria; Laurasiatheria; Cetartiodactyla; Ruminantia; Pecora; Bovidae; Bovinae; Bos	PF00646.30^F-box^F-box domain^9-36^E:3.5e-05
3	gut secretory cells	CapteG224374	4.21e-56	0.861511	0.355	0.084	6.91e-52	CD109_HUMAN^CD109_HUMAN^Q:115-4602,H:28-1417^23.34%ID^E:2e-69^RecName: Full=CD109 antigen;^Eukaryota; Metazoa; Chordata; Craniata; Vertebrata; Euteleostomi; Mammalia; Eutheria; Euarchontoglires; Primates; Haplorrhini; Catarrhini; Hominidae; Homo	PF01835.16^A2M_N^MG2 domain^140-230^E:3e-11`PF07703.11^A2M_N_2^Alpha-2-macroglobulin family N-terminal region^464-589^E:2.3e-08`PF00207.19^A2M^Alpha-2-macroglobulin family^739-825^E:9.7e-09`PF07678.11^A2M_comp^A-macroglobulin complement component^1038-1302^E:1.4e-38`PF07677.11^A2M_recep^A-macroglobulin receptor^1421-1490^E:1.5e-06
3	gut secretory cells	CapteG189629	2.84e-57	0.860382	0.849	0.701	4.66e-53	.	.
3	gut secretory cells	CapteG213418	1.51e-66	0.856902	0.918	0.789	2.49e-62	.	.
3	gut secretory cells	CapteG73417	1.69e-63	0.854517	0.935	0.786	2.78e-59	NCOR1_XENTR^NCOR1_XENTR^Q:94-1041,H:173-491^50.78%ID^E:2e-92^RecName: Full=Nuclear receptor corepressor 1;^Eukaryota; Metazoa; Chordata; Craniata; Vertebrata; Euteleostomi; Amphibia; Batrachia; Anura; Pipoidea; Pipidae; Xenopodinae; Xenopus; Silurana	PF15784.2^GPS2_interact^G-protein pathway suppressor 2-interacting domain^7-89^E:3.9e-24
3	gut secretory cells	CapteG176971	1.37e-76	0.854093	0.455	0.102	2.25e-72	BUP1_PONAB^BUP1_PONAB^Q:13-627,H:1-204^63.41%ID^E:2e-122^RecName: Full=Beta-ureidopropionase;^Eukaryota; Metazoa; Chordata; Craniata; Vertebrata; Euteleostomi; Mammalia; Eutheria; Euarchontoglires; Primates; Haplorrhini; Catarrhini; Hominidae; Pongo`BUP1_PONAB^BUP1_PONAB^Q:627-959,H:205-315^81.08%ID^E:2e-122^RecName: Full=Beta-ureidopropionase;^Eukaryota; Metazoa; Chordata; Craniata; Vertebrata; …	PF00795.19^CN_hydrolase^Carbon-nitrogen hydrolase^76-214^E:1.4e-23
3	gut secretory cells	CapteG154123	2.84e-119	0.854061	0.318	0.027	4.66e-115	YP20_BACLI^YP20_BACLI^Q:207-710,H:9-176^32.35%ID^E:4e-18^RecName: Full=Uncharacterized N-acetyltransferase p20;^Bacteria; Firmicutes; Bacilli; Bacillales; Bacillaceae; Bacillus	PF13302.4^Acetyltransf_3^Acetyltransferase (GNAT) domain^18-156^E:6.1e-26`PF00583.22^Acetyltransf_1^Acetyltransferase (GNAT) family^81-156^E:2.7e-08
3	gut secretory cells	CapteG197461	1.22e-53	0.852721	0.54	0.197	2.01e-49	PHIPL_XENTR^PHIPL_XENTR^Q:4-639,H:161-372^33.18%ID^E:3e-29^RecName: Full=Phytanoyl-CoA hydroxylase-interacting protein-like;^Eukaryota; Metazoa; Chordata; Craniata; Vertebrata; Euteleostomi; Amphibia; Batrachia; Anura; Pipoidea; Pipidae; Xenopodinae; Xenopus; Silurana	.
3	gut secretory cells	CapteG228981	5.15e-75	0.851174	0.955	0.821	8.47e-71	PTN23_MOUSE^PTN23_MOUSE^Q:28-2202,H:1-712^47.48%ID^E:0^RecName: Full=Tyrosine-protein phosphatase non-receptor type 23;^Eukaryota; Metazoa; Chordata; Craniata; Vertebrata; Euteleostomi; Mammalia; Eutheria; Euarchontoglires; Glires; Rodentia; Sciurognathi; Muroidea; Muridae; Murinae; Mus; Mus`PTN23_MOUSE^PTN23_MOUSE^Q:5392-6654,H:1157-1573^39.64%ID^E:1e-70^RecName: Full=Tyrosine-protein phosphatas…	PF03097.15^BRO1^BRO1-like domain^18-390^E:9.5e-116`PF13949.3^ALIX_LYPXL_bnd^ALIX V-shaped domain binding to HIV^425-727^E:8.2e-53`PF00102.24^Y_phosphatase^Protein-tyrosine phosphatase^1920-2150^E:1.2e-67
3	gut secretory cells	tRNA-Pro.62	1.13e-65	0.851046	0.966	0.829	1.86e-61
3	gut secretory cells	CapteG55025	8.79e-110	0.848683	0.395	0.052	1.44e-105	XYNA_DICTH^XYNA_DICTH^Q:1-606,H:100-333^27.43%ID^E:4e-16^RecName: Full=Beta-1,4-xylanase;^Bacteria; Dictyoglomi; Dictyoglomales; Dictyoglomaceae; Dictyoglomus	PF00331.17^Glyco_hydro_10^Glycosyl hydrolase family 10^3-197^E:9.5e-29
3	gut secretory cells	CapteG191104	7.15e-51	0.846644	0.645	0.281	1.18e-46
3	gut secretory cells	CapteG152329	5.36e-40	0.846426	0.682	0.437	8.8e-36	RALB_TODPA^RALB_TODPA^Q:439-1464,H:1-339^45.61%ID^E:2e-112^RecName: Full=Retinal-binding protein;^Eukaryota; Metazoa; Lophotrochozoa; Mollusca; Cephalopoda; Coleoidea; Neocoleoidea; Decapodiformes; Teuthida; Oegopsina; Ommastrephidae; Todarodes	PF00650.17^CRAL_TRIO^CRAL/TRIO domain^75-240^E:1.8e-37
3	gut secretory cells	CapteG177803	1.02e-70	0.846192	0.98	0.842	1.67e-66	FURIN_MOUSE^FURIN_MOUSE^Q:91-1842,H:29-620^61.18%ID^E:0^RecName: Full=Furin;^Eukaryota; Metazoa; Chordata; Craniata; Vertebrata; Euteleostomi; Mammalia; Eutheria; Euarchontoglires; Glires; Rodentia; Sciurognathi; Muroidea; Muridae; Murinae; Mus; Mus	PF16470.2^S8_pro-domain^Peptidase S8 pro-domain^36-109^E:2.3e-22`PF00082.19^Peptidase_S8^Subtilase family^144-427^E:3.4e-52`PF01483.17^P_proprotein^Proprotein convertase P-domain^487-570^E:4.6e-25
3	gut secretory cells	CapteG163091	3.79e-79	0.845738	0.358	0.06	6.23e-75	SC23A_DANRE^SC23A_DANRE^Q:104-2452,H:1-765^75.73%ID^E:0^RecName: Full=Protein transport protein Sec23A;^Eukaryota; Metazoa; Chordata; Craniata; Vertebrata; Euteleostomi; Actinopterygii; Neopterygii; Teleostei; Ostariophysi; Cypriniformes; Cyprinidae; Danio	PF04810.12^zf-Sec23_Sec24^Sec23/Sec24 zinc finger^58-98^E:2.3e-15`PF04811.12^Sec23_trunk^Sec23/Sec24 trunk domain^127-398^E:1.2e-76`PF08033.9^Sec23_BS^Sec23/Sec24 beta-sandwich domain^410-512^E:9.7e-33`PF04815.12^Sec23_helical^Sec23/Sec24 helical domain^526-624^E:4e-24`PF00626.19^Gelsolin^Gelsolin repeat^640-726^E:6.1e-13
3	gut secretory cells	CapteG163343	2.17e-77	0.84393	0.446	0.098	3.56e-73	SNG1_PONAB^SNG1_PONAB^Q:55-660,H:15-217^44.29%ID^E:4e-31^RecName: Full=Synaptogyrin-1;^Eukaryota; Metazoa; Chordata; Craniata; Vertebrata; Euteleostomi; Mammalia; Eutheria; Euarchontoglires; Primates; Haplorrhini; Catarrhini; Hominidae; Pongo	PF01284.20^MARVEL^Membrane-associating domain^21-163^E:4.4e-25
3	gut secretory cells	CapteG74696	2.49e-75	0.843809	0.96	0.841	4.09e-71	PMYT1_XENLA^PMYT1_XENLA^Q:55-912,H:64-351^50.34%ID^E:2e-93^RecName: Full=Membrane-associated tyrosine- and threonine-specific cdc2-inhibitory kinase;^Eukaryota; Metazoa; Chordata; Craniata; Vertebrata; Euteleostomi; Amphibia; Batrachia; Anura; Pipoidea; Pipidae; Xenopodinae; Xenopus; Xenopus	PF00069.22^Pkinase^Protein kinase domain^57-304^E:5.5e-53`PF07714.14^Pkinase_Tyr^Protein tyrosine kinase^57-302^E:1.4e-30
3	gut secretory cells	CapteG77697	1.71e-48	0.842174	0.776	0.547	2.8e-44	KY_MOUSE^KY_MOUSE^Q:82-513,H:214-351^36.81%ID^E:3e-22^RecName: Full=Kyphoscoliosis peptidase;^Eukaryota; Metazoa; Chordata; Craniata; Vertebrata; Euteleostomi; Mammalia; Eutheria; Euarchontoglires; Glires; Rodentia; Sciurognathi; Muroidea; Muridae; Murinae; Mus; Mus	.
3	gut secretory cells	tRNA-Met.28	1.85e-77	0.842082	0.426	0.089	3.03e-73
3	gut secretory cells	CapteG159544	7.19e-60	0.837547	0.895	0.797	1.18e-55	LAP4A_CHICK^LAP4A_CHICK^Q:74-847,H:1-218^28.96%ID^E:2e-25^RecName: Full=Lysosomal-associated transmembrane protein 4A;^Eukaryota; Metazoa; Chordata; Craniata; Vertebrata; Euteleostomi; Archelosauria; Archosauria; Dinosauria; Saurischia; Theropoda; Coelurosauria; Aves; Neognathae; Galloanserae; Galliformes; Phasianidae; Phasianinae; Gallus	PF03821.13^Mtp^Golgi 4-transmembrane spanning transporter^109-182^E:7.5e-08`PF03821.13^Mtp^Golgi 4-transmembrane spanning transporter^190-272^E:1.5e-09
3	gut secretory cells	CapteG156381	6.37e-50	0.836906	0.608	0.271	1.05e-45	CACT_DROME^CACT_DROME^Q:692-1327,H:220-438^36.32%ID^E:6e-33^RecName: Full=NF-kappa-B inhibitor cactus;^Eukaryota; Metazoa; Ecdysozoa; Arthropoda; Hexapoda; Insecta; Pterygota; Neoptera; Endopterygota; Diptera; Brachycera; Muscomorpha; Ephydroidea; Drosophilidae; Drosophila; Sophophora	PF12796.4^Ank_2^Ankyrin repeats (3 copies)^165-250^E:2.4e-08`PF13637.3^Ank_4^Ankyrin repeats (many copies)^199-249^E:1.1e-08`PF00023.27^Ank^Ankyrin repeat^229-249^E:0.0018`PF12796.4^Ank_2^Ankyrin repeats (3 copies)^297-381^E:1.9e-09
3	gut secretory cells	CapteG199224	5.23e-55	0.836114	0.807	0.594	8.59e-51	.	PF04500.13^FLYWCH^FLYWCH zinc finger domain^67-124^E:2.1e-05
3	gut secretory cells	CapteG218806	5.81e-68	0.835923	0.526	0.15	9.55e-64	AL4A1_DANRE^AL4A1_DANRE^Q:43-1626,H:27-555^59.55%ID^E:0^RecName: Full=Delta-1-pyrroline-5-carboxylate dehydrogenase, mitochondrial;^Eukaryota; Metazoa; Chordata; Craniata; Vertebrata; Euteleostomi; Actinopterygii; Neopterygii; Teleostei; Ostariophysi; Cypriniformes; Cyprinidae; Danio	PF00171.19^Aldedh^Aldehyde dehydrogenase family^63-526^E:8.5e-101
3	gut secretory cells	CapteG193121	8.06e-41	0.834392	0.554	0.258	1.32e-36	.	.
3	gut secretory cells	CapteG103345	1.18e-72	0.833006	0.98	0.854	1.94e-68	KIF12_HUMAN^KIF12_HUMAN^Q:1-1107,H:30-396^45.24%ID^E:1e-98^RecName: Full=Kinesin-like protein KIF12;^Eukaryota; Metazoa; Chordata; Craniata; Vertebrata; Euteleostomi; Mammalia; Eutheria; Euarchontoglires; Primates; Haplorrhini; Catarrhini; Hominidae; Homo	PF00225.20^Kinesin^Kinesin motor domain^2-333^E:9e-98`PF16796.2^Microtub_bd^Microtubule binding^11-140^E:7.1e-25
3	gut secretory cells	CapteG209181	1.93e-47	0.832298	0.776	0.544	3.17e-43	.	.
3	gut secretory cells	CapteG226244	4.42e-112	0.831389	0.327	0.032	7.26e-108	GGT1_RAT^GGT1_RAT^Q:124-1833,H:37-568^33.05%ID^E:8e-74^RecName: Full=Gamma-glutamyltranspeptidase 1;^Eukaryota; Metazoa; Chordata; Craniata; Vertebrata; Euteleostomi; Mammalia; Eutheria; Euarchontoglires; Glires; Rodentia; Sciurognathi; Muroidea; Muridae; Murinae; Rattus	PF01019.18^G_glu_transpept^Gamma-glutamyltranspeptidase^65-606^E:1.2e-113
3	gut secretory cells	CapteG191808	1.79e-121	0.830259	0.355	0.036	2.95e-117
3	gut secretory cells	CapteG27724	2.17e-62	0.829798	0.955	0.832	3.56e-58	TONSL_DANRE^TONSL_DANRE^Q:1-312,H:519-622^60.58%ID^E:2e-38^RecName: Full=Tonsoku-like protein;^Eukaryota; Metazoa; Chordata; Craniata; Vertebrata; Euteleostomi; Actinopterygii; Neopterygii; Teleostei; Ostariophysi; Cypriniformes; Cyprinidae; Danio	PF13637.3^Ank_4^Ankyrin repeats (many copies)^7-58^E:1.7e-07`PF12796.4^Ank_2^Ankyrin repeats (3 copies)^9-104^E:9.3e-19`PF13857.3^Ank_5^Ankyrin repeats (many copies)^33-71^E:3.8e-06`PF13606.3^Ank_3^Ankyrin repeat^37-65^E:4.9e-08`PF00023.27^Ank^Ankyrin repeat^38-66^E:4.7e-07`PF13637.3^Ank_4^Ankyrin repeats (many copies)^52-94^E:5.2e-05`PF13857.3^Ank_5^Ankyrin repeats (many copies)^57-104^E:9.4e-10…
3	gut secretory cells	CapteG209081	3.8e-52	0.82945	0.787	0.567	6.24e-48	NLRP3_MOUSE^NLRP3_MOUSE^Q:712-1527,H:218-529^22.69%ID^E:3e-07^RecName: Full=NACHT, LRR and PYD domains-containing protein 3;^Eukaryota; Metazoa; Chordata; Craniata; Vertebrata; Euteleostomi; Mammalia; Eutheria; Euarchontoglires; Glires; Rodentia; Sciurognathi; Muroidea; Muridae; Murinae; Mus; Mus	PF00619.18^CARD^Caspase recruitment domain^76-145^E:1.9e-11`PF05729.9^NACHT^NACHT domain^237-383^E:4.4e-16
3	gut secretory cells	CapteG29499	3.97e-58	0.826386	0.878	0.711	6.52e-54	NDUBA_BOMMO^NDUBA_BOMMO^Q:4-294,H:30-124^42.27%ID^E:2e-19^RecName: Full=NADH dehydrogenase [ubiquinone] 1 beta subcomplex subunit 10;^Eukaryota; Metazoa; Ecdysozoa; Arthropoda; Hexapoda; Insecta; Pterygota; Neoptera; Endopterygota; Lepidoptera; Glossata; Ditrysia; Bombycoidea; Bombycidae; Bombycinae; Bombyx	PF10249.6^NDUFB10^NADH-ubiquinone oxidoreductase subunit 10^2-98^E:2.5e-31
3	gut secretory cells	CapteG197657	6.63e-68	0.822874	0.952	0.818	1.09e-63	.	.
3	gut secretory cells	CapteG196253	9e-60	0.819841	0.858	0.679	1.48e-55	FBX11_MOUSE^FBX11_MOUSE^Q:115-2592,H:102-930^69.87%ID^E:0^RecName: Full=F-box only protein 11;^Eukaryota; Metazoa; Chordata; Craniata; Vertebrata; Euteleostomi; Mammalia; Eutheria; Euarchontoglires; Glires; Rodentia; Sciurognathi; Muroidea; Muridae; Murinae; Mus; Mus	PF12937.4^F-box-like^F-box-like^94-136^E:1.3e-14`PF00646.30^F-box^F-box domain^94-135^E:2.1e-06`PF05048.10^NosD^Periplasmic copper-binding protein (NosD)^296-416^E:9.4e-06`PF13229.3^Beta_helix^Right handed beta helix region^297-426^E:1e-14`PF05048.10^NosD^Periplasmic copper-binding protein (NosD)^409-554^E:6.7e-12`PF13229.3^Beta_helix^Right handed beta helix region^418-564^E:2.2e-27`PF05048.10^No…
3	gut secretory cells	CapteG119119	1.37e-58	0.818759	0.443	0.121	2.25e-54	.	.
3	gut secretory cells	CapteG158442	1.36e-64	0.818398	0.955	0.842	2.23e-60	SSUH2_HUMAN^SSUH2_HUMAN^Q:403-1362,H:37-353^36.53%ID^E:1e-68^RecName: Full=Protein SSUH2 homolog;^Eukaryota; Metazoa; Chordata; Craniata; Vertebrata; Euteleostomi; Mammalia; Eutheria; Euarchontoglires; Primates; Haplorrhini; Catarrhini; Hominidae; Homo	.
3	gut secretory cells	CapteG157209	2.17e-70	0.818362	0.48	0.121	3.57e-66	TKTL2_MOUSE^TKTL2_MOUSE^Q:48-1892,H:14-627^65.42%ID^E:0^RecName: Full=Transketolase-like protein 2;^Eukaryota; Metazoa; Chordata; Craniata; Vertebrata; Euteleostomi; Mammalia; Eutheria; Euarchontoglires; Glires; Rodentia; Sciurognathi; Muroidea; Muridae; Murinae; Mus; Mus	PF00456.18^Transketolase_N^Transketolase, thiamine diphosphate binding domain^16-268^E:2.6e-45`PF00676.17^E1_dh^Dehydrogenase E1 component^123-232^E:5.4e-12`PF09364.7^XFP_N^XFP N-terminal domain^123-229^E:2.9e-05`PF02779.21^Transket_pyr^Transketolase, pyrimidine binding domain^318-479^E:5.8e-34`PF02780.17^Transketolase_C^Transketolase, C-terminal domain^494-616^E:3e-29
3	gut secretory cells	CapteG58944	3.08e-62	0.817435	0.963	0.819	5.07e-58	.	.
3	gut secretory cells	CapteG131081	5.34e-49	0.817041	0.753	0.503	8.77e-45	PF07_PLAF7^PF07_PLAF7^Q:1-231,H:808-884^49.35%ID^E:4e-09^RecName: Full=Uncharacterized protein PFC0810c {ECO:0000312|EMBL:CAB11130.1};^Eukaryota; Alveolata; Apicomplexa; Aconoidasida; Haemosporida; Plasmodiidae; Plasmodium; Plasmodium (Laverania)`PF07_PLAF7^PF07_PLAF7^Q:1-201,H:820-886^50.75%ID^E:1e-07^RecName: Full=Uncharacterized protein PFC0810c {ECO:0000312|EMBL:CAB11130.1};^Eukaryota; Alveol…	.
3	gut secretory cells	CapteG151988	5.14e-65	0.81704	0.969	0.847	8.45e-61	CSK1_CAEEL^CSK1_CAEEL^Q:587-997,H:407-539^36.5%ID^E:6e-19^RecName: Full=Tyrosine-protein kinase csk-1 {ECO:0000305};^Eukaryota; Metazoa; Ecdysozoa; Nematoda; Chromadorea; Rhabditida; Rhabditoidea; Rhabditidae; Peloderinae; Caenorhabditis	PF00069.22^Pkinase^Protein kinase domain^96-263^E:1.5e-18`PF07714.14^Pkinase_Tyr^Protein tyrosine kinase^100-266^E:3.6e-28
3	gut secretory cells	tRNA-Thr.28	1.31e-133	0.816959	0.369	0.034	2.15e-129
3	gut secretory cells	CapteG225380	7.59e-88	0.812929	0.324	0.044	1.25e-83	AMPN_HUMAN^AMPN_HUMAN^Q:79-2583,H:75-965^27.97%ID^E:1e-87^RecName: Full=Aminopeptidase N;^Eukaryota; Metazoa; Chordata; Craniata; Vertebrata; Euteleostomi; Mammalia; Eutheria; Euarchontoglires; Primates; Haplorrhini; Catarrhini; Hominidae; Homo	PF01433.17^Peptidase_M1^Peptidase family M1^27-430^E:7.3e-82`PF11838.5^ERAP1_C^ERAP1-like C-terminal domain^565-686^E:1.1e-22`PF11838.5^ERAP1_C^ERAP1-like C-terminal domain^693-823^E:3.8e-10
3	gut secretory cells	CapteG93322	2.09e-78	0.812913	1	0.869	3.44e-74	FBLN3_RAT^FBLN3_RAT^Q:19-405,H:173-290^38.93%ID^E:3e-17^RecName: Full=EGF-containing fibulin-like extracellular matrix protein 1;^Eukaryota; Metazoa; Chordata; Craniata; Vertebrata; Euteleostomi; Mammalia; Eutheria; Euarchontoglires; Glires; Rodentia; Sciurognathi; Muroidea; Muridae; Murinae; Rattus`FBLN3_RAT^FBLN3_RAT^Q:16-402,H:213-330^38.17%ID^E:2e-12^RecName: Full=EGF-containing fibulin-like …	PF07645.12^EGF_CA^Calcium-binding EGF domain^7-42^E:5e-07`PF12662.4^cEGF^Complement Clr-like EGF-like^29-53^E:1e-07`PF07645.12^EGF_CA^Calcium-binding EGF domain^50-92^E:3e-05`PF12662.4^cEGF^Complement Clr-like EGF-like^74-97^E:9.9e-09`PF07645.12^EGF_CA^Calcium-binding EGF domain^94-139^E:0.00038
3	gut secretory cells	tRNA-Ser.11	1.59e-52	0.811236	0.523	0.181	2.61e-48
3	gut secretory cells	CapteG154180	7.78e-65	0.809404	0.955	0.822	1.28e-60	PMGT1_RAT^PMGT1_RAT^Q:66-1904,H:40-642^61.26%ID^E:0^RecName: Full=Protein O-linked-mannose beta-1,2-N-acetylglucosaminyltransferase 1;^Eukaryota; Metazoa; Chordata; Craniata; Vertebrata; Euteleostomi; Mammalia; Eutheria; Euarchontoglires; Glires; Rodentia; Sciurognathi; Muroidea; Muridae; Murinae; Rattus	PF15711.2^ILEI^Interleukin-like EMT inducer^114-203^E:3e-26`PF03071.12^GNT-I^GNT-I family^352-599^E:7.1e-50
3	gut secretory cells	CapteG225862	7.02e-51	0.809343	0.884	0.751	1.15e-46	.	.
3	gut secretory cells	CapteG221485	6.57e-47	0.806207	0.724	0.487	1.08e-42	CYSK1_SCHPO^CYSK1_SCHPO^Q:4-990,H:13-345^58.56%ID^E:1e-125^RecName: Full=Cysteine synthase 1;^Eukaryota; Fungi; Dikarya; Ascomycota; Taphrinomycotina; Schizosaccharomycetes; Schizosaccharomycetales; Schizosaccharomycetaceae; Schizosaccharomyces	PF00291.22^PALP^Pyridoxal-phosphate dependent enzyme^2-293^E:4.4e-71
3	gut secretory cells	CapteG156119	6.13e-69	0.805985	0.972	0.854	1.01e-64	SMCE1_RAT^SMCE1_RAT^Q:321-1064,H:35-267^55.65%ID^E:1e-86^RecName: Full=SWI/SNF-related matrix-associated actin-dependent regulator of chromatin subfamily E member 1;^Eukaryota; Metazoa; Chordata; Craniata; Vertebrata; Euteleostomi; Mammalia; Eutheria; Euarchontoglires; Glires; Rodentia; Sciurognathi; Muroidea; Muridae; Murinae; Rattus	PF00505.16^HMG_box^HMG (high mobility group) box^70-141^E:6.4e-15
3	gut secretory cells	CapteG195776	9.38e-70	0.804906	0.429	0.096	1.54e-65	.	.
3	gut secretory cells	CapteG211288	1.37e-27	0.804555	0.5	0.274	2.26e-23	UBTD1_XENLA^UBTD1_XENLA^Q:1-705,H:1-234^56.78%ID^E:6e-87^RecName: Full=Ubiquitin domain-containing protein 1;^Eukaryota; Metazoa; Chordata; Craniata; Vertebrata; Euteleostomi; Amphibia; Batrachia; Anura; Pipoidea; Pipidae; Xenopodinae; Xenopus; Xenopus	PF16455.2^UBD^Ubiquitin-binding domain^38-133^E:3.6e-35`PF00240.20^ubiquitin^Ubiquitin family^157-223^E:2.6e-15`PF11976.5^Rad60-SLD^Ubiquitin-2 like Rad60 SUMO-like^159-223^E:8.5e-10
3	gut secretory cells	CapteG218447	6.96e-61	0.802595	0.989	0.854	1.14e-56	.	.
3	gut secretory cells	tRNA-Thr.8	1.73e-90	0.800732	0.452	0.084	2.84e-86
3	gut secretory cells	CapteG138578	1.21e-90	0.799799	0.381	0.06	1.98e-86	MATN2_HUMAN^MATN2_HUMAN^Q:13-630,H:319-525^41.83%ID^E:1e-36^RecName: Full=Matrilin-2;^Eukaryota; Metazoa; Chordata; Craniata; Vertebrata; Euteleostomi; Mammalia; Eutheria; Euarchontoglires; Primates; Haplorrhini; Catarrhini; Hominidae; Homo`MATN2_HUMAN^MATN2_HUMAN^Q:22-633,H:363-567^40.29%ID^E:6e-36^RecName: Full=Matrilin-2;^Eukaryota; Metazoa; Chordata; Craniata; Vertebrata; Euteleostomi; Mammal…	PF07645.12^EGF_CA^Calcium-binding EGF domain^6-44^E:9e-05`PF07645.12^EGF_CA^Calcium-binding EGF domain^46-85^E:0.00052`PF07645.12^EGF_CA^Calcium-binding EGF domain^87-125^E:0.0043`PF07645.12^EGF_CA^Calcium-binding EGF domain^129-156^E:0.0044`PF07645.12^EGF_CA^Calcium-binding EGF domain^170-208^E:0.00046
3	gut secretory cells	CapteG19163	1.39e-38	0.799675	0.503	0.204	2.28e-34	KCD15_HUMAN^KCD15_HUMAN^Q:332-997,H:44-268^57.78%ID^E:2e-92^RecName: Full=BTB/POZ domain-containing protein KCTD15;^Eukaryota; Metazoa; Chordata; Craniata; Vertebrata; Euteleostomi; Mammalia; Eutheria; Euarchontoglires; Primates; Haplorrhini; Catarrhini; Hominidae; Homo	PF02214.19^BTB_2^BTB/POZ domain^29-116^E:8.2e-20
3	gut secretory cells	CapteG154687	6.02e-44	0.799483	0.722	0.471	9.89e-40	FADS6_BOVIN^FADS6_BOVIN^Q:102-1067,H:21-342^43.34%ID^E:3e-81^RecName: Full=Fatty acid desaturase 6;^Eukaryota; Metazoa; Chordata; Craniata; Vertebrata; Euteleostomi; Mammalia; Eutheria; Laurasiatheria; Cetartiodactyla; Ruminantia; Pecora; Bovidae; Bovinae; Bos	PF00487.21^FA_desaturase^Fatty acid desaturase^75-319^E:1.1e-15
3	gut secretory cells	CapteG205034	6.02e-72	0.79778	0.986	0.846	9.88e-68	.	.
3	gut secretory cells	CapteG191592	3.49e-119	0.796565	0.33	0.03	5.74e-115	CNTN3_RAT^CNTN3_RAT^Q:433-1188,H:267-489^22.52%ID^E:2e-06^RecName: Full=Contactin-3;^Eukaryota; Metazoa; Chordata; Craniata; Vertebrata; Euteleostomi; Mammalia; Eutheria; Euarchontoglires; Glires; Rodentia; Sciurognathi; Muroidea; Muridae; Murinae; Rattus	PF07679.13^I-set^Immunoglobulin I-set domain^312-403^E:1.6e-05`PF00047.22^ig^Immunoglobulin domain^317-397^E:8.1e-06
4	myoblasts	CapteG147173	9.03e-245	1.76754	0.547	0.013	1.48e-240	YRD6_CAEEL^YRD6_CAEEL^Q:1-186,H:938-1000^46.03%ID^E:3e-07^RecName: Full=Uncharacterized protein K02A2.6;^Eukaryota; Metazoa; Ecdysozoa; Nematoda; Chromadorea; Rhabditida; Rhabditoidea; Rhabditidae; Peloderinae; Caenorhabditis	.
4	myoblasts	CapteG110385	1.08e-156	0.79859	0.274	0.004	1.78e-152	WNT2B_CHICK^WNT2B_CHICK^Q:10-957,H:59-374^42.06%ID^E:5e-84^RecName: Full=Protein Wnt-2b;^Eukaryota; Metazoa; Chordata; Craniata; Vertebrata; Euteleostomi; Archelosauria; Archosauria; Dinosauria; Saurischia; Theropoda; Coelurosauria; Aves; Neognathae; Galloanserae; Galliformes; Phasianidae; Phasianinae; Gallus	PF00110.16^wnt^wnt family^14-319^E:1.2e-102
4	myoblasts	CapteG214503	1.24e-91	0.876615	0.255	0.009	2.03e-87	GAS6_HUMAN^GAS6_HUMAN^Q:10-393,H:158-277^39.06%ID^E:2e-11^RecName: Full=Growth arrest-specific protein 6;^Eukaryota; Metazoa; Chordata; Craniata; Vertebrata; Euteleostomi; Mammalia; Eutheria; Euarchontoglires; Primates; Haplorrhini; Catarrhini; Hominidae; Homo	PF12662.4^cEGF^Complement Clr-like EGF-like^26-47^E:3.3e-06`PF07645.12^EGF_CA^Calcium-binding EGF domain^44-87^E:1.6e-07`PF12662.4^cEGF^Complement Clr-like EGF-like^69-92^E:3e-06`PF07645.12^EGF_CA^Calcium-binding EGF domain^89-131^E:0.0003
4	myoblasts	CapteG187447	2e-126	1.23006	0.33	0.01	3.28e-122	.	.
4	myoblasts	CapteG33932	5.25e-182	1.51643	0.472	0.015	8.63e-178	IDS_MOUSE^IDS_MOUSE^Q:7-1362,H:40-541^39.38%ID^E:7e-102^RecName: Full=Iduronate 2-sulfatase;^Eukaryota; Metazoa; Chordata; Craniata; Vertebrata; Euteleostomi; Mammalia; Eutheria; Euarchontoglires; Glires; Rodentia; Sciurognathi; Muroidea; Muridae; Murinae; Mus; Mus	PF00884.20^Sulfatase^Sulfatase^2-353^E:9.2e-48
4	myoblasts	CapteG164030	6.73e-76	0.951842	0.283	0.015	1.11e-71	PARP2_ARATH^PARP2_ARATH^Q:1-678,H:410-632^38.98%ID^E:3e-37^RecName: Full=Poly [ADP-ribose] polymerase 2;^Eukaryota; Viridiplantae; Streptophyta; Embryophyta; Tracheophyta; Spermatophyta; Magnoliophyta; eudicotyledons; Gunneridae; Pentapetalae; rosids; malvids; Brassicales; Brassicaceae; Camelineae; Arabidopsis	PF00644.17^PARP^Poly(ADP-ribose) polymerase catalytic domain^3-208^E:6.4e-47
4	myoblasts	CapteG187834	8.11e-101	1.08624	0.358	0.018	1.33e-96	BTBDG_MACFA^BTBDG_MACFA^Q:304-1635,H:79-501^36.18%ID^E:7e-95^RecName: Full=BTB/POZ domain-containing protein 16;^Eukaryota; Metazoa; Chordata; Craniata; Vertebrata; Euteleostomi; Mammalia; Eutheria; Euarchontoglires; Primates; Haplorrhini; Catarrhini; Cercopithecidae; Cercopithecinae; Macaca	.
4	myoblasts	CapteG180944	1.82e-92	0.881619	0.34	0.018	2.99e-88	AT5SL_RAT^AT5SL_RAT^Q:285-845,H:55-238^40.11%ID^E:4e-38^RecName: Full=ATP synthase subunit s-like protein;^Eukaryota; Metazoa; Chordata; Craniata; Vertebrata; Euteleostomi; Mammalia; Eutheria; Euarchontoglires; Glires; Rodentia; Sciurognathi; Muroidea; Muridae; Murinae; Rattus	PF00560.30^LRR_1^Leucine Rich Repeat^178-198^E:1.3
4	myoblasts	CapteG218681	8.63e-93	1.16073	0.349	0.019	1.42e-88	PKNX1_BOVIN^PKNX1_BOVIN^Q:4-192,H:256-319^40.62%ID^E:1e-07^RecName: Full=Homeobox protein PKNOX1;^Eukaryota; Metazoa; Chordata; Craniata; Vertebrata; Euteleostomi; Mammalia; Eutheria; Laurasiatheria; Cetartiodactyla; Ruminantia; Pecora; Bovidae; Bovinae; Bos	PF05920.8^Homeobox_KN^Homeobox KN domain^23-61^E:8.5e-10`PF00046.26^Homeobox^Homeobox domain^28-62^E:6e-05
4	myoblasts	CapteG184855	3.34e-68	1.05885	0.311	0.022	5.48e-64	.	.
4	myoblasts	CapteG206541	5.25e-71	0.988645	0.34	0.025	8.62e-67	.	.
4	myoblasts	CapteG202315	4.44e-44	1.01505	0.274	0.027	7.3e-40	UN45B_XENTR^UN45B_XENTR^Q:16-2742,H:2-925^43.82%ID^E:0^RecName: Full=Protein unc-45 homolog B {ECO:0000250|UniProtKB:Q8IWX7};^Eukaryota; Metazoa; Chordata; Craniata; Vertebrata; Euteleostomi; Amphibia; Batrachia; Anura; Pipoidea; Pipidae; Xenopodinae; Xenopus; Silurana	PF07719.14^TPR_2^Tetratricopeptide repeat^11-37^E:4.1e-05`PF13432.3^TPR_16^Tetratricopeptide repeat^14-80^E:2.8e-05`PF13176.3^TPR_7^Tetratricopeptide repeat^18-42^E:0.0037`PF00515.25^TPR_1^Tetratricopeptide repeat^47-79^E:9e-07`PF11701.5^UNC45-central^Myosin-binding striated muscle assembly central^290-476^E:5.9e-32
4	myoblasts	CapteG47955	1.44e-129	1.52415	0.491	0.028	2.36e-125	.	PF02517.13^Abi^CAAX protease self-immunity^109-201^E:2.1e-10
4	myoblasts	CapteG205938	4.66e-108	1.73854	0.472	0.033	7.66e-104	.	PF01697.24^Glyco_transf_92^Glycosyltransferase family 92^298-506^E:1e-30
4	myoblasts	CapteG182653	5.99e-28	0.918401	0.274	0.043	9.85e-24	ABHEA_RAT^ABHEA_RAT^Q:301-915,H:40-238^36.59%ID^E:6e-38^RecName: Full=Protein ABHD14A {ECO:0000305};^Eukaryota; Metazoa; Chordata; Craniata; Vertebrata; Euteleostomi; Mammalia; Eutheria; Euarchontoglires; Glires; Rodentia; Sciurognathi; Muroidea; Muridae; Murinae; Rattus	.
4	myoblasts	CapteG190065	2.2e-23	0.821321	0.264	0.047	3.61e-19	TTPAL_PONAB^TTPAL_PONAB^Q:22-855,H:31-303^28.83%ID^E:4e-28^RecName: Full=Alpha-tocopherol transfer protein-like;^Eukaryota; Metazoa; Chordata; Craniata; Vertebrata; Euteleostomi; Mammalia; Eutheria; Euarchontoglires; Primates; Haplorrhini; Catarrhini; Hominidae; Pongo	PF00650.17^CRAL_TRIO^CRAL/TRIO domain^104-250^E:3.3e-26`PF13716.3^CRAL_TRIO_2^Divergent CRAL/TRIO domain^156-246^E:7.4e-06
4	myoblasts	CapteG212855	1.08e-33	0.64714	0.321	0.048	1.77e-29	CMKMT_RAT^CMKMT_RAT^Q:136-975,H:50-322^41.55%ID^E:2e-75^RecName: Full=Calmodulin-lysine N-methyltransferase;^Eukaryota; Metazoa; Chordata; Craniata; Vertebrata; Euteleostomi; Mammalia; Eutheria; Euarchontoglires; Glires; Rodentia; Sciurognathi; Muroidea; Muridae; Murinae; Rattus	PF10294.6^Methyltransf_16^Lysine methyltransferase^131-268^E:6.8e-18
4	myoblasts	CapteG210038	2.93e-20	0.665207	0.255	0.049	4.82e-16	.	.
4	myoblasts	CapteG199419	2.31e-23	0.692403	0.274	0.05	3.79e-19	.	.
4	myoblasts	CapteG136943	9.04e-93	1.90288	0.528	0.051	1.48e-88	EST3B_MOUSE^EST3B_MOUSE^Q:13-1611,H:22-552^35.96%ID^E:6e-95^RecName: Full=Carboxylesterase 3B;^Eukaryota; Metazoa; Chordata; Craniata; Vertebrata; Euteleostomi; Mammalia; Eutheria; Euarchontoglires; Glires; Rodentia; Sciurognathi; Muroidea; Muridae; Murinae; Mus; Mus	PF00135.25^COesterase^Carboxylesterase family^16-532^E:1.4e-135`PF07859.10^Abhydrolase_3^alpha/beta hydrolase fold^125-299^E:1.7e-09
4	myoblasts	CapteG225429	4.59e-19	0.544439	0.255	0.051	7.55e-15	MCES_RAT^MCES_RAT^Q:196-1230,H:128-459^56.2%ID^E:2e-119^RecName: Full=mRNA cap guanine-N7 methyltransferase;^Eukaryota; Metazoa; Chordata; Craniata; Vertebrata; Euteleostomi; Mammalia; Eutheria; Euarchontoglires; Glires; Rodentia; Sciurognathi; Muroidea; Muridae; Murinae; Rattus	PF03291.13^Pox_MCEL^mRNA capping enzyme^63-410^E:8.3e-99`PF13649.3^Methyltransf_25^Methyltransferase domain^126-241^E:1.1e-08`PF08241.9^Methyltransf_11^Methyltransferase domain^127-244^E:5.2e-05
4	myoblasts	CapteG199475	1.03e-24	0.662623	0.292	0.053	1.69e-20	.	PF09588.7^YqaJ^YqaJ-like viral recombinase domain^50-239^E:3.2e-11
4	myoblasts	CapteG220858	2.28e-26	0.56915	0.321	0.059	3.74e-22	CAN7_MOUSE^CAN7_MOUSE^Q:1-2340,H:1-813^52.57%ID^E:0^RecName: Full=Calpain-7;^Eukaryota; Metazoa; Chordata; Craniata; Vertebrata; Euteleostomi; Mammalia; Eutheria; Euarchontoglires; Glires; Rodentia; Sciurognathi; Muroidea; Muridae; Murinae; Mus; Mus	PF04212.15^MIT^MIT (microtubule interacting and transport) domain^8-69^E:1.8e-08`PF04212.15^MIT^MIT (microtubule interacting and transport) domain^64-127^E:4e-11`PF00648.18^Peptidase_C2^Calpain family cysteine protease^211-501^E:2e-43`PF01067.19^Calpain_III^Calpain large subunit, domain III^659-770^E:4.5e-08
4	myoblasts	CapteG225376	1.26e-14	0.480572	0.255	0.062	2.07e-10	FBX22_MOUSE^FBX22_MOUSE^Q:137-1273,H:36-398^28.32%ID^E:9e-38^RecName: Full=F-box only protein 22;^Eukaryota; Metazoa; Chordata; Craniata; Vertebrata; Euteleostomi; Mammalia; Eutheria; Euarchontoglires; Glires; Rodentia; Sciurognathi; Muroidea; Muridae; Murinae; Mus; Mus	PF00646.30^F-box^F-box domain^19-52^E:8.2e-06`PF12937.4^F-box-like^F-box-like^19-48^E:1.1e-05`PF10442.6^FIST_C^FIST C domain^311-364^E:1.7e-10
4	myoblasts	CapteG145161	2.57e-14	0.574744	0.255	0.065	4.23e-10	GPKOW_DANRE^GPKOW_DANRE^Q:1-699,H:63-306^38.19%ID^E:6e-34^RecName: Full=G patch domain and KOW motifs-containing protein;^Eukaryota; Metazoa; Chordata; Craniata; Vertebrata; Euteleostomi; Actinopterygii; Neopterygii; Teleostei; Ostariophysi; Cypriniformes; Cyprinidae; Danio`GPKOW_DANRE^GPKOW_DANRE^Q:895-1245,H:389-505^47.86%ID^E:8e-27^RecName: Full=G patch domain and KOW motifs-containing protein…	PF12656.4^G-patch_2^DExH-box splicing factor binding site^96-159^E:1.5e-17
4	myoblasts	CapteG97086	1.91e-16	0.547566	0.274	0.065	3.14e-12	CSMD1_MOUSE^CSMD1_MOUSE^Q:4-405,H:2895-3032^42.03%ID^E:6e-26^RecName: Full=CUB and sushi domain-containing protein 1;^Eukaryota; Metazoa; Chordata; Craniata; Vertebrata; Euteleostomi; Mammalia; Eutheria; Euarchontoglires; Glires; Rodentia; Sciurognathi; Muroidea; Muridae; Murinae; Mus; Mus`CSMD1_MOUSE^CSMD1_MOUSE^Q:16-408,H:2778-2913^36.76%ID^E:7e-24^RecName: Full=CUB and sushi domain-containing …	PF00084.17^Sushi^Sushi repeat (SCR repeat)^24-77^E:9.7e-11`PF00084.17^Sushi^Sushi repeat (SCR repeat)^82-135^E:5.3e-13
4	myoblasts	CapteG104557	5.56e-14	0.504718	0.255	0.065	9.14e-10	CFBL_CHICK^CFBL_CHICK^Q:31-321,H:97-192^44.33%ID^E:8e-18^RecName: Full=Complement factor B-like protease;^Eukaryota; Metazoa; Chordata; Craniata; Vertebrata; Euteleostomi; Archelosauria; Archosauria; Dinosauria; Saurischia; Theropoda; Coelurosauria; Aves; Neognathae; Galloanserae; Galliformes; Phasianidae; Phasianinae; Gallus	PF00084.17^Sushi^Sushi repeat (SCR repeat)^6-45^E:2.3e-07`PF00084.17^Sushi^Sushi repeat (SCR repeat)^50-106^E:4.5e-14
4	myoblasts	CapteG197953	1.26e-14	0.478408	0.264	0.067	2.06e-10	.	PF00619.18^CARD^Caspase recruitment domain^484-563^E:7.1e-14
4	myoblasts	CapteG216258	1.09e-12	0.439229	0.255	0.069	1.79e-08	.	.
4	myoblasts	CapteG186246	2.34e-11	0.35383	0.255	0.073	3.85e-07	.	.
4	myoblasts	CapteG125771	1.84e-11	0.42302	0.255	0.074	3.02e-07	VMAT2_BOVIN^VMAT2_BOVIN^Q:1-519,H:179-350^37.57%ID^E:3e-28^RecName: Full=Synaptic vesicular amine transporter;^Eukaryota; Metazoa; Chordata; Craniata; Vertebrata; Euteleostomi; Mammalia; Eutheria; Laurasiatheria; Cetartiodactyla; Ruminantia; Pecora; Bovidae; Bovinae; Bos	PF07690.13^MFS_1^Major Facilitator Superfamily^6-179^E:1.9e-15
4	myoblasts	CapteG220902	1.43e-22	0.651451	0.34	0.075	2.35e-18	RS16_DROME^RS16_DROME^Q:19-423,H:14-148^82.96%ID^E:5e-77^RecName: Full=40S ribosomal protein S16;^Eukaryota; Metazoa; Ecdysozoa; Arthropoda; Hexapoda; Insecta; Pterygota; Neoptera; Endopterygota; Diptera; Brachycera; Muscomorpha; Ephydroidea; Drosophilidae; Drosophila; Sophophora	PF00380.16^Ribosomal_S9^Ribosomal protein S9/S16^11-141^E:3.3e-35
4	myoblasts	CapteG223254	8.25e-12	0.35436	0.264	0.076	1.35e-07	PGFS_RAT^PGFS_RAT^Q:289-828,H:1-190^47.89%ID^E:7e-37^RecName: Full=Prostamide/prostaglandin F synthase;^Eukaryota; Metazoa; Chordata; Craniata; Vertebrata; Euteleostomi; Mammalia; Eutheria; Euarchontoglires; Glires; Rodentia; Sciurognathi; Muroidea; Muridae; Murinae; Rattus	PF13911.3^AhpC-TSA_2^AhpC/TSA antioxidant enzyme^48-158^E:4.6e-18
4	myoblasts	CapteG201465	7.97e-13	0.461088	0.274	0.077	1.31e-08	TMPS9_HUMAN^TMPS9_HUMAN^Q:793-2238,H:190-735^30.04%ID^E:7e-58^RecName: Full=Transmembrane protease serine 9;^Eukaryota; Metazoa; Chordata; Craniata; Vertebrata; Euteleostomi; Mammalia; Eutheria; Euarchontoglires; Primates; Haplorrhini; Catarrhini; Hominidae; Homo`TMPS9_HUMAN^TMPS9_HUMAN^Q:1582-2244,H:838-1059^34.5%ID^E:3e-25^RecName: Full=Transmembrane protease serine 9;^Eukaryota; Metazoa; Chord…	PF00431.17^CUB^CUB domain^143-252^E:2.7e-30`PF00089.23^Trypsin^Trypsin^283-497^E:1.3e-41`PF09342.8^DUF1986^Domain of unknown function (DUF1986)^290-385^E:1.9e-07`PF00089.23^Trypsin^Trypsin^519-742^E:6.9e-50`PF09342.8^DUF1986^Domain of unknown function (DUF1986)^528-635^E:6.1e-07`PF00431.17^CUB^CUB domain^802-878^E:1e-12
4	myoblasts	CapteG198103	9.52e-15	0.561864	0.292	0.079	1.56e-10	.	.
4	myoblasts	CapteG195011	1.41e-24	0.872716	0.358	0.08	2.32e-20	.	.
4	myoblasts	CapteG227528	1.45e-21	0.842711	0.34	0.08	2.39e-17	.	PF01697.24^Glyco_transf_92^Glycosyltransferase family 92^175-364^E:2.4e-08
4	myoblasts	CapteG225564	2.47e-10	0.425506	0.255	0.08	4.06e-06	SOAT1_CHLAE^SOAT1_CHLAE^Q:7-1593,H:25-547^47.06%ID^E:5e-149^RecName: Full=Sterol O-acyltransferase 1;^Eukaryota; Metazoa; Chordata; Craniata; Vertebrata; Euteleostomi; Mammalia; Eutheria; Euarchontoglires; Primates; Haplorrhini; Catarrhini; Cercopithecidae; Cercopithecinae; Chlorocebus	PF03062.16^MBOAT^MBOAT, membrane-bound O-acyltransferase family^211-502^E:5.8e-37
4	myoblasts	CapteG59564	1.7e-15	0.630035	0.302	0.081	2.79e-11	MIB2_CHICK^MIB2_CHICK^Q:1-225,H:9-83^65.33%ID^E:5e-29^RecName: Full=E3 ubiquitin-protein ligase MIB2;^Eukaryota; Metazoa; Chordata; Craniata; Vertebrata; Euteleostomi; Archelosauria; Archosauria; Dinosauria; Saurischia; Theropoda; Coelurosauria; Aves; Neognathae; Galloanserae; Galliformes; Phasianidae; Phasianinae; Gallus`MIB2_CHICK^MIB2_CHICK^Q:10-225,H:160-230^41.67%ID^E:1e-11^RecName: Full=E3 …	PF06701.10^MIB_HERC2^Mib_herc2^4-69^E:1.3e-27
4	myoblasts	CapteG202724	4.91e-10	0.453072	0.255	0.081	8.07e-06	.	.
4	myoblasts	CapteG217708	1.56e-09	0.399385	0.255	0.084	2.56e-05	CE290_MOUSE^CE290_MOUSE^Q:1-2952,H:1-1023^35.93%ID^E:1e-150^RecName: Full=Centrosomal protein of 290 kDa;^Eukaryota; Metazoa; Chordata; Craniata; Vertebrata; Euteleostomi; Mammalia; Eutheria; Euarchontoglires; Glires; Rodentia; Sciurognathi; Muroidea; Muridae; Murinae; Mus; Mus	.
4	myoblasts	CapteG196473	4.26e-14	0.707029	0.292	0.085	7.01e-10	.	.
4	myoblasts	CapteG224341	2.51e-10	0.544577	0.264	0.085	4.13e-06	ALS_HUMAN^ALS_HUMAN^Q:899-2296,H:81-542^30.41%ID^E:1e-39^RecName: Full=Insulin-like growth factor-binding protein complex acid labile subunit;^Eukaryota; Metazoa; Chordata; Craniata; Vertebrata; Euteleostomi; Mammalia; Eutheria; Euarchontoglires; Primates; Haplorrhini; Catarrhini; Hominidae; Homo`ALS_HUMAN^ALS_HUMAN^Q:1319-2680,H:77-531^28.82%ID^E:2e-35^RecName: Full=Insulin-like growth factor-bi…	PF13306.3^LRR_5^Leucine rich repeats (6 copies)^65-179^E:8.2e-11`PF13855.3^LRR_8^Leucine rich repeat^107-166^E:4e-17`PF13306.3^LRR_5^Leucine rich repeats (6 copies)^147-249^E:2.1e-06`PF12799.4^LRR_4^Leucine Rich repeats (2 copies)^154-194^E:7.5e-07`PF13855.3^LRR_8^Leucine rich repeat^163-214^E:2e-07`PF13855.3^LRR_8^Leucine rich repeat^203-262^E:1.3e-14`PF13306.3^LRR_5^Leucine rich repeats (6 copi…
4	myoblasts	CapteG86593	2.25e-10	0.479008	0.264	0.085	3.69e-06	ZBT20_HUMAN^ZBT20_HUMAN^Q:22-297,H:565-654^33.7%ID^E:4e-13^RecName: Full=Zinc finger and BTB domain-containing protein 20;^Eukaryota; Metazoa; Chordata; Craniata; Vertebrata; Euteleostomi; Mammalia; Eutheria; Euarchontoglires; Primates; Haplorrhini; Catarrhini; Hominidae; Homo	PF13894.3^zf-C2H2_4^C2H2-type zinc finger^49-71^E:0.00013`PF00096.23^zf-C2H2^Zinc finger, C2H2 type^49-71^E:1.4e-05`PF13912.3^zf-C2H2_6^C2H2-type zinc finger^49-73^E:3e-05
4	myoblasts	CapteG216387	1.05e-09	0.458614	0.264	0.087	1.72e-05	Y7407_DICDI^Y7407_DICDI^Q:43-2964,H:370-1375^21.64%ID^E:2e-47^RecName: Full=TPR repeat-containing protein DDB_G0287407;^Eukaryota; Amoebozoa; Mycetozoa; Dictyosteliida; Dictyostelium	PF13271.3^DUF4062^Domain of unknown function (DUF4062)^15-129^E:1.3e-14`PF05729.9^NACHT^NACHT domain^278-450^E:3.6e-09`PF13374.3^TPR_10^Tetratricopeptide repeat^893-927^E:2e-07`PF13176.3^TPR_7^Tetratricopeptide repeat^894-921^E:0.00069`PF13181.3^TPR_8^Tetratricopeptide repeat^894-924^E:0.0061`PF13424.3^TPR_12^Tetratricopeptide repeat^897-966^E:8e-10
4	myoblasts	CapteG108305	7.02e-10	0.497355	0.264	0.088	1.15e-05	.	.
4	myoblasts	CapteG169768	3.85e-48	1.32307	0.5	0.089	6.33e-44	.	.
4	myoblasts	CapteG198614	1.9e-10	0.74529	0.274	0.089	3.12e-06	.	.
4	myoblasts	CapteG206078	1.6e-08	0.373525	0.255	0.089	0.000262999	HAUS5_HUMAN^HAUS5_HUMAN^Q:91-1824,H:29-622^22.29%ID^E:3e-07^RecName: Full=HAUS augmin-like complex subunit 5;^Eukaryota; Metazoa; Chordata; Craniata; Vertebrata; Euteleostomi; Mammalia; Eutheria; Euarchontoglires; Primates; Haplorrhini; Catarrhini; Hominidae; Homo	PF14817.3^HAUS5^HAUS augmin-like complex subunit 5^5-604^E:1.9e-65
4	myoblasts	CapteG212007	7.46e-14	0.520803	0.311	0.091	1.23e-09	.	PF01575.16^MaoC_dehydratas^MaoC like domain^188-241^E:6.3e-09
4	myoblasts	CapteG43769	8.64e-17	0.543352	0.34	0.092	1.42e-12	GNT2C_HUMAN^GNT2C_HUMAN^Q:1-963,H:74-388^38.34%ID^E:9e-69^RecName: Full=N-acetyllactosaminide beta-1,6-N-acetylglucosaminyl-transferase, isoform C;^Eukaryota; Metazoa; Chordata; Craniata; Vertebrata; Euteleostomi; Mammalia; Eutheria; Euarchontoglires; Primates; Haplorrhini; Catarrhini; Hominidae; Homo	PF02485.18^Branch^Core-2/I-Branching enzyme^24-252^E:4.6e-47
4	myoblasts	CapteG187327	6.77e-11	0.505452	0.283	0.092	1.11e-06	.	.
4	myoblasts	CapteG168770	1.41e-08	0.392547	0.264	0.095	0.000232113	PON2_MELGA^PON2_MELGA^Q:168-1112,H:42-354^37.58%ID^E:4e-62^RecName: Full=Serum paraoxonase/arylesterase 2;^Eukaryota; Metazoa; Chordata; Craniata; Vertebrata; Euteleostomi; Archelosauria; Archosauria; Dinosauria; Saurischia; Theropoda; Coelurosauria; Aves; Neognathae; Galloanserae; Galliformes; Phasianidae; Meleagridinae; Meleagris	PF08450.9^SGL^SMP-30/Gluconolaconase/LRE-like region^123-260^E:7e-11`PF01731.17^Arylesterase^Arylesterase^145-224^E:3.4e-12
4	myoblasts	CapteG224167	1.09e-07	0.363774	0.255	0.095	0.00178351	BUB1B_HUMAN^BUB1B_HUMAN^Q:13-1254,H:13-420^38.33%ID^E:1e-70^RecName: Full=Mitotic checkpoint serine/threonine-protein kinase BUB1 beta;^Eukaryota; Metazoa; Chordata; Craniata; Vertebrata; Euteleostomi; Mammalia; Eutheria; Euarchontoglires; Primates; Haplorrhini; Catarrhini; Hominidae; Homo`BUB1B_HUMAN^BUB1B_HUMAN^Q:2632-3504,H:749-1003^22.3%ID^E:1e-10^RecName: Full=Mitotic checkpoint serine/threo…	PF08311.9^Mad3_BUB1_I^Mad3/BUB1 homology region 1^50-171^E:4.1e-44`PF00069.22^Pkinase^Protein kinase domain^898-1130^E:3.2e-08
4	myoblasts	CapteG141891	1.28e-07	0.341824	0.255	0.095	0.00209634	GTPB1_RAT^GTPB1_RAT^Q:31-1587,H:67-588^73.56%ID^E:0^RecName: Full=GTP-binding protein 1;^Eukaryota; Metazoa; Chordata; Craniata; Vertebrata; Euteleostomi; Mammalia; Eutheria; Euarchontoglires; Glires; Rodentia; Sciurognathi; Muroidea; Muridae; Murinae; Rattus	PF00009.24^GTP_EFTU^Elongation factor Tu GTP binding domain^104-324^E:5.3e-22`PF03144.22^GTP_EFTU_D2^Elongation factor Tu domain 2^350-420^E:4e-07`PF03143.14^GTP_EFTU_D3^Elongation factor Tu C-terminal domain^428-484^E:0.007
4	myoblasts	CapteG160239	3.82e-11	0.634426	0.292	0.096	6.28e-07	SPSY_HUMAN^SPSY_HUMAN^Q:155-1087,H:46-360^41.9%ID^E:1e-73^RecName: Full=Spermine synthase;^Eukaryota; Metazoa; Chordata; Craniata; Vertebrata; Euteleostomi; Mammalia; Eutheria; Euarchontoglires; Primates; Haplorrhini; Catarrhini; Hominidae; Homo	PF01564.14^Spermine_synth^Spermine/spermidine synthase^131-364^E:2.1e-40
4	myoblasts	CapteG177504	3.59e-09	0.538624	0.274	0.098	5.9e-05	REM1_MOUSE^REM1_MOUSE^Q:322-984,H:82-297^35.37%ID^E:7e-29^RecName: Full=GTP-binding protein REM 1;^Eukaryota; Metazoa; Chordata; Craniata; Vertebrata; Euteleostomi; Mammalia; Eutheria; Euarchontoglires; Glires; Rodentia; Sciurognathi; Muroidea; Muridae; Murinae; Mus; Mus	PF00071.19^Ras^Ras family^108-269^E:1.6e-22
4	myoblasts	CapteG189076	8.67e-12	0.613722	0.302	0.099	1.43e-07	PEAMT_SPIOL^PEAMT_SPIOL^Q:10-1500,H:8-493^53.31%ID^E:0^RecName: Full=Phosphoethanolamine N-methyltransferase;^Eukaryota; Viridiplantae; Streptophyta; Embryophyta; Tracheophyta; Spermatophyta; Magnoliophyta; eudicotyledons; Gunneridae; Pentapetalae; Caryophyllales; Amaranthaceae; Chenopodioideae; Anserineae; Spinacia	PF05891.9^Methyltransf_PK^AdoMet dependent proline di-methyltransferase^25-184^E:1.9e-09`PF01209.15^Ubie_methyltran^ubiE/COQ5 methyltransferase family^41-155^E:0.00019`PF13489.3^Methyltransf_23^Methyltransferase domain^50-186^E:2.2e-07`PF13847.3^Methyltransf_31^Methyltransferase domain^53-157^E:2.5e-09`PF05401.8^NodS^Nodulation protein S (NodS)^54-153^E:1.3e-08`PF03848.11^TehB^Tellurite resistanc…
4	myoblasts	CapteG20406	4.07e-08	0.419627	0.264	0.099	0.00066924	TBB2_ECHMU^TBB2_ECHMU^Q:1-1287,H:1-429^92.77%ID^E:0^RecName: Full=Tubulin beta-2 chain;^Eukaryota; Metazoa; Platyhelminthes; Cestoda; Eucestoda; Cyclophyllidea; Taeniidae; Echinococcus	PF00091.22^Tubulin^Tubulin/FtsZ family, GTPase domain^3-211^E:1.4e-68`PF03953.14^Tubulin_C^Tubulin C-terminal domain^261-381^E:1e-41
4	myoblasts	CapteG185754	9.11e-09	0.526715	0.274	0.1	0.000149712	PAA1_YEAST^PAA1_YEAST^Q:28-504,H:14-186^35.06%ID^E:7e-22^RecName: Full=Polyamine N-acetyltransferase 1;^Eukaryota; Fungi; Dikarya; Ascomycota; Saccharomycotina; Saccharomycetes; Saccharomycetales; Saccharomycetaceae; Saccharomyces	PF00583.22^Acetyltransf_1^Acetyltransferase (GNAT) family^59-145^E:9.7e-10`PF13673.4^Acetyltransf_10^Acetyltransferase (GNAT) domain^85-165^E:5.7e-10
4	myoblasts	CapteG196515	3.5e-13	0.524581	0.321	0.1	5.75e-09	.	.
4	myoblasts	CapteG227067	1.59e-07	0.482963	0.255	0.1	0.00261096	FABP_SCHJA^FABP_SCHJA^Q:39-452,H:1-131^31.65%ID^E:3e-10^RecName: Full=Fatty acid-binding protein;^Eukaryota; Metazoa; Platyhelminthes; Trematoda; Digenea; Strigeidida; Schistosomatoidea; Schistosomatidae; Schistosoma	PF14651.3^Lipocalin_7^Lipocalin / cytosolic fatty-acid binding protein family^5-138^E:6.6e-07`PF00061.20^Lipocalin^Lipocalin / cytosolic fatty-acid binding protein family^5-122^E:2.1e-05
4	myoblasts	CapteG131592	1.19e-06	0.263072	0.255	0.1	0.0195258
4	myoblasts	CapteG218115	8.27e-11	0.66858	0.292	0.102	1.36e-06	BRAT1_HUMAN^BRAT1_HUMAN^Q:1135-2163,H:419-809^26.3%ID^E:3e-17^RecName: Full=BRCA1-associated ATM activator 1;^Eukaryota; Metazoa; Chordata; Craniata; Vertebrata; Euteleostomi; Mammalia; Eutheria; Euarchontoglires; Primates; Haplorrhini; Catarrhini; Hominidae; Homo	.
4	myoblasts	CapteG113601	1.67e-07	0.370829	0.264	0.102	0.00274223
4	myoblasts	CapteG199508	9.33e-11	0.724044	0.292	0.104	1.53e-06	.	.
4	myoblasts	CapteG120502	1.19e-06	0.465829	0.255	0.104	0.0195475	ANR17_HUMAN^ANR17_HUMAN^Q:22-255,H:1299-1378^40%ID^E:1e-10^RecName: Full=Ankyrin repeat domain-containing protein 17;^Eukaryota; Metazoa; Chordata; Craniata; Vertebrata; Euteleostomi; Mammalia; Eutheria; Euarchontoglires; Primates; Haplorrhini; Catarrhini; Hominidae; Homo`ANR17_HUMAN^ANR17_HUMAN^Q:22-252,H:315-391^38.96%ID^E:4e-08^RecName: Full=Ankyrin repeat domain-containing protein 17;^Eukaryo…	PF13637.3^Ank_4^Ankyrin repeats (many copies)^6-47^E:1.4e-07`PF12796.4^Ank_2^Ankyrin repeats (3 copies)^7-85^E:3.7e-12`PF13857.3^Ank_5^Ankyrin repeats (many copies)^13-67^E:5.7e-10`PF13606.3^Ank_3^Ankyrin repeat^27-55^E:0.0038`PF00023.27^Ank^Ankyrin repeat^28-58^E:0.016`PF13637.3^Ank_4^Ankyrin repeats (many copies)^37-79^E:1.8e-10`PF13606.3^Ank_3^Ankyrin repeat^60-85^E:0.0012`PF00023.27^Ank^Ankyr…
4	myoblasts	CapteG221452	5.89e-12	0.516382	0.321	0.106	9.68e-08	DPP10_HUMAN^DPP10_HUMAN^Q:43-2412,H:12-783^28.82%ID^E:8e-93^RecName: Full=Inactive dipeptidyl peptidase 10;^Eukaryota; Metazoa; Chordata; Craniata; Vertebrata; Euteleostomi; Mammalia; Eutheria; Euarchontoglires; Primates; Haplorrhini; Catarrhini; Hominidae; Homo	PF00930.18^DPPIV_N^Dipeptidyl peptidase IV (DPP IV) N-terminal region^154-253^E:1.6e-16`PF00930.18^DPPIV_N^Dipeptidyl peptidase IV (DPP IV) N-terminal region^299-506^E:6.6e-37`PF00326.18^Peptidase_S9^Prolyl oligopeptidase family^598-799^E:4.1e-35
4	myoblasts	CapteG213545	3.97e-10	0.503914	0.302	0.106	6.53e-06	CGAS_NEMVE^CGAS_NEMVE^Q:295-1023,H:117-381^24.36%ID^E:7e-10^RecName: Full=Cyclic GMP-AMP synthase;^Eukaryota; Metazoa; Cnidaria; Anthozoa; Hexacorallia; Actiniaria; Edwardsiidae; Nematostella	PF03281.11^Mab-21^Mab-21 protein^104-361^E:8.9e-26
4	myoblasts	CapteG132401	5.09e-08	0.484667	0.274	0.106	0.000835641	ZITB_YERPS^ZITB_YERPS^Q:130-861,H:45-289^28.57%ID^E:2e-22^RecName: Full=Zinc transporter ZitB {ECO:0000255|HAMAP-Rule:MF_00552};^Bacteria; Proteobacteria; Gammaproteobacteria; Enterobacteriales; Enterobacteriaceae; Yersinia	PF01545.18^Cation_efflux^Cation efflux family^17-207^E:5.2e-40
4	myoblasts	CapteG167222	3.73e-10	0.473487	0.302	0.106	6.12e-06	MFSD5_HUMAN^MFSD5_HUMAN^Q:19-1314,H:1-433^46.79%ID^E:2e-116^RecName: Full=Molybdate-anion transporter;^Eukaryota; Metazoa; Chordata; Craniata; Vertebrata; Euteleostomi; Mammalia; Eutheria; Euarchontoglires; Primates; Haplorrhini; Catarrhini; Hominidae; Homo	PF05631.11^MFS_5^Sugar-tranasporters, 12 TM^6-339^E:2.8e-86`PF07690.13^MFS_1^Major Facilitator Superfamily^46-382^E:5.9e-17
4	myoblasts	CapteG219762	1.42e-06	0.423402	0.255	0.106	0.023317	PIEZ2_MOUSE^PIEZ2_MOUSE^Q:1-4491,H:1-1571^30.14%ID^E:0^RecName: Full=Piezo-type mechanosensitive ion channel component 2;^Eukaryota; Metazoa; Chordata; Craniata; Vertebrata; Euteleostomi; Mammalia; Eutheria; Euarchontoglires; Glires; Rodentia; Sciurognathi; Muroidea; Muridae; Murinae; Mus; Mus`PIEZ2_MOUSE^PIEZ2_MOUSE^Q:5878-7527,H:2240-2784^47.41%ID^E:5e-127^RecName: Full=Piezo-type mechanosensit…	PF15917.2^PIEZO^Piezo^1347-1481^E:1.5e-43`PF12166.5^Piezo_RRas_bdg^Piezo non-specific cation channel, R-Ras-binding domain^2133-2525^E:2.9e-112`PF12166.5^Piezo_RRas_bdg^Piezo non-specific cation channel, R-Ras-binding domain^2525-2575^E:9.3e-18`PF12166.5^Piezo_RRas_bdg^Piezo non-specific cation channel, R-Ras-binding domain^2576-2654^E:2.5e-22
4	myoblasts	CapteG196957	2.53e-11	0.674139	0.311	0.107	4.16e-07	KCP_HUMAN^KCP_HUMAN^Q:286-801,H:1126-1283^24.43%ID^E:4e-06^RecName: Full=Kielin/chordin-like protein;^Eukaryota; Metazoa; Chordata; Craniata; Vertebrata; Euteleostomi; Mammalia; Eutheria; Euarchontoglires; Primates; Haplorrhini; Catarrhini; Hominidae; Homo	PF00094.22^VWD^von Willebrand factor type D domain^128-271^E:6e-08
4	myoblasts	CapteG216992	1.48e-07	0.390767	0.274	0.108	0.00242769	.	.
4	myoblasts	CapteG221672	1.52e-07	0.377627	0.274	0.108	0.00249786
4	myoblasts	CapteG190199	1.25e-56	1.49991	0.594	0.109	2.05e-52	.	.
4	myoblasts	CapteG178449	9.6e-11	0.572648	0.311	0.109	1.58e-06	CCNI_HUMAN^CCNI_HUMAN^Q:193-972,H:2-262^40.91%ID^E:2e-49^RecName: Full=Cyclin-I;^Eukaryota; Metazoa; Chordata; Craniata; Vertebrata; Euteleostomi; Mammalia; Eutheria; Euarchontoglires; Primates; Haplorrhini; Catarrhini; Hominidae; Homo	PF00134.20^Cyclin_N^Cyclin, N-terminal domain^47-146^E:1.9e-23
4	myoblasts	CapteG215667	4.02e-07	0.489003	0.264	0.109	0.00660788	VLDLR_HUMAN^VLDLR_HUMAN^Q:118-1140,H:30-371^37.33%ID^E:2e-42^RecName: Full=Very low-density lipoprotein receptor;^Eukaryota; Metazoa; Chordata; Craniata; Vertebrata; Euteleostomi; Mammalia; Eutheria; Euarchontoglires; Primates; Haplorrhini; Catarrhini; Hominidae; Homo`VLDLR_HUMAN^VLDLR_HUMAN^Q:109-987,H:114-398^33.44%ID^E:2e-27^RecName: Full=Very low-density lipoprotein receptor;^Eukaryota; Metaz…	PF00057.15^Ldl_recept_a^Low-density lipoprotein receptor domain class A^42-78^E:6.4e-11`PF00057.15^Ldl_recept_a^Low-density lipoprotein receptor domain class A^82-117^E:2.8e-11`PF00057.15^Ldl_recept_a^Low-density lipoprotein receptor domain class A^204-239^E:1.2e-09`PF00057.15^Ldl_recept_a^Low-density lipoprotein receptor domain class A^324-364^E:3.5e-07
4	myoblasts	CapteG173854	3.05e-07	0.406819	0.274	0.109	0.00500784	RLP24_DANRE^RLP24_DANRE^Q:21-473,H:1-151^73.51%ID^E:3e-76^RecName: Full=Probable ribosome biogenesis protein RLP24;^Eukaryota; Metazoa; Chordata; Craniata; Vertebrata; Euteleostomi; Actinopterygii; Neopterygii; Teleostei; Ostariophysi; Cypriniformes; Cyprinidae; Danio	PF01246.17^Ribosomal_L24e^Ribosomal protein L24e^1-65^E:2.5e-31
4	myoblasts	CapteG104243	3.87e-06	0.322245	0.255	0.109	0.0636595
4	myoblasts	CapteG193853	1.49e-09	0.487262	0.302	0.111	2.45e-05	.	PF15299.3^ALS2CR8^Amyotrophic lateral sclerosis 2 chromosomal region candidate gene 8^70-153^E:4.3e-11
4	myoblasts	CapteG206375	2.46e-07	0.440151	0.274	0.111	0.00404717	.	.
4	myoblasts	CapteG144758	6.01e-08	0.350502	0.283	0.111	0.000988237	PUUB_ECOLI^PUUB_ECOLI^Q:1-804,H:154-422^44.98%ID^E:5e-82^RecName: Full=Gamma-glutamylputrescine oxidoreductase;^Bacteria; Proteobacteria; Gammaproteobacteria; Enterobacteriales; Enterobacteriaceae; Escherichia	PF01266.21^DAO^FAD dependent oxidoreductase^2-226^E:1.1e-27
4	myoblasts	CapteG225305	3.08e-09	0.44138	0.302	0.113	5.07e-05	.	.
4	myoblasts	CapteG151173	1.05e-05	0.436601	0.255	0.113	0.17254	S2540_DANRE^S2540_DANRE^Q:87-1202,H:4-335^48.94%ID^E:1e-118^RecName: Full=Solute carrier family 25 member 40;^Eukaryota; Metazoa; Chordata; Craniata; Vertebrata; Euteleostomi; Actinopterygii; Neopterygii; Teleostei; Ostariophysi; Cypriniformes; Cyprinidae; Danio`S2540_DANRE^S2540_DANRE^Q:462-899,H:180-337^25.95%ID^E:3e-09^RecName: Full=Solute carrier family 25 member 40;^Eukaryota; Metazoa; Chord…	PF00153.24^Mito_carr^Mitochondrial carrier protein^14-51^E:2.6e-06`PF00153.24^Mito_carr^Mitochondrial carrier protein^121-174^E:1.8e-10`PF00153.24^Mito_carr^Mitochondrial carrier protein^189-270^E:7.3e-17`PF00153.24^Mito_carr^Mitochondrial carrier protein^275-373^E:5.1e-21
4	myoblasts	tRNA-Met.28	1.95e-06	0.459262	0.264	0.115	0.0319752
4	myoblasts	CapteG189899	5.18e-06	0.432235	0.255	0.115	0.0851254	.	.
4	myoblasts	CapteG175858	4.61e-06	0.397908	0.264	0.115	0.0757996	SERP2_MOUSE^SERP2_MOUSE^Q:104-292,H:1-63^73.02%ID^E:9e-27^RecName: Full=Stress-associated endoplasmic reticulum protein 2;^Eukaryota; Metazoa; Chordata; Craniata; Vertebrata; Euteleostomi; Mammalia; Eutheria; Euarchontoglires; Glires; Rodentia; Sciurognathi; Muroidea; Muridae; Murinae; Mus; Mus	PF06624.9^RAMP4^Ribosome associated membrane protein RAMP4^2-61^E:2.2e-29
4	myoblasts	CapteG228003	2.13e-05	0.273428	0.255	0.115	0.34935
4	myoblasts	CapteG188882	1.7e-05	0.354935	0.255	0.116	0.27965
4	myoblasts	CapteG211996	2.54e-07	0.440396	0.283	0.117	0.00417411	.	.
4	myoblasts	CapteG175688	4.24e-08	0.425047	0.292	0.117	0.000696174	SRBD1_HUMAN^SRBD1_HUMAN^Q:85-2283,H:209-987^42.88%ID^E:0^RecName: Full=S1 RNA-binding domain-containing protein 1;^Eukaryota; Metazoa; Chordata; Craniata; Vertebrata; Euteleostomi; Mammalia; Eutheria; Euarchontoglires; Primates; Haplorrhini; Catarrhini; Hominidae; Homo	PF09371.7^Tex_N^Tex-like protein N-terminal domain^39-213^E:9.4e-47`PF16921.2^Tex_YqgF^Tex protein YqgF-like domain^357-486^E:2.6e-46`PF12836.4^HHH_3^Helix-hairpin-helix motif^526-588^E:5.5e-23`PF00575.20^S1^S1 RNA binding domain^696-763^E:1.6e-12
4	myoblasts	CapteG205940	1.41e-08	0.623166	0.302	0.118	0.00023092	.	.
4	myoblasts	CapteG222622	2.94e-05	0.369993	0.255	0.118	0.483363
4	myoblasts	CapteG213196	8.25e-08	0.460296	0.292	0.119	0.00135584	RN150_DANRE^RN150_DANRE^Q:103-447,H:40-156^42.02%ID^E:1e-16^RecName: Full=RING finger protein 150;^Eukaryota; Metazoa; Chordata; Craniata; Vertebrata; Euteleostomi; Actinopterygii; Neopterygii; Teleostei; Ostariophysi; Cypriniformes; Cyprinidae; Danio	PF02225.19^PA^PA domain^73-135^E:4.1e-05
4	myoblasts	CapteG219438	6.18e-05	0.257285	0.255	0.119	1
4	myoblasts	CapteG207184	8.16e-10	0.556999	0.321	0.12	1.34e-05	.	.
4	myoblasts	CapteG223845	1.15e-08	0.51293	0.302	0.12	0.000188689	MLRP2_ACRMI^MLRP2_ACRMI^Q:40-1134,H:1211-1565^28.24%ID^E:2e-20^RecName: Full=MAM and LDL-receptor class A domain-containing protein 2;^Eukaryota; Metazoa; Cnidaria; Anthozoa; Hexacorallia; Scleractinia; Astrocoeniina; Acroporidae; Acropora`MLRP2_ACRMI^MLRP2_ACRMI^Q:100-1119,H:534-882^26.1%ID^E:3e-18^RecName: Full=MAM and LDL-receptor class A domain-containing protein 2;^Eukaryota; Metazoa; Cnidar…	PF00629.20^MAM^MAM domain, meprin/A5/mu^26-181^E:2.2e-24`PF00629.20^MAM^MAM domain, meprin/A5/mu^215-366^E:1.1e-18
4	myoblasts	CapteG198052	7.8e-08	0.48819	0.292	0.12	0.00128119	.	PF00685.24^Sulfotransfer_1^Sulfotransferase domain^161-381^E:0.00015
4	myoblasts	CapteG117691	1.05e-08	0.488359	0.311	0.123	0.000171952	HIRA_XENLA^HIRA_XENLA^Q:1-2829,H:1-1008^46%ID^E:0^RecName: Full=Protein HIRA;^Eukaryota; Metazoa; Chordata; Craniata; Vertebrata; Euteleostomi; Amphibia; Batrachia; Anura; Pipoidea; Pipidae; Xenopodinae; Xenopus; Xenopus	PF00400.29^WD40^WD domain, G-beta repeat^67-97^E:6e-06`PF00400.29^WD40^WD domain, G-beta repeat^120-157^E:2.1e-08`PF00400.29^WD40^WD domain, G-beta repeat^164-199^E:3.8e-05`PF09453.7^HIRA_B^HIRA B motif^431-449^E:1.2e-06`PF02178.16^AT_hook^AT hook motif^569-578^E:1.3`PF07569.8^Hira^TUP1-like enhancer of split^694-892^E:2.6e-54
4	myoblasts	CapteG123144	3.79e-05	0.280598	0.264	0.123	0.622531
4	myoblasts	CapteG200215	1.06e-05	0.318088	0.274	0.124	0.173741
4	myoblasts	CapteG21635	1.01e-07	0.643313	0.292	0.125	0.00165352	ANR45_MOUSE^ANR45_MOUSE^Q:154-762,H:36-235^33%ID^E:8e-34^RecName: Full=Ankyrin repeat domain-containing protein 45;^Eukaryota; Metazoa; Chordata; Craniata; Vertebrata; Euteleostomi; Mammalia; Eutheria; Euarchontoglires; Glires; Rodentia; Sciurognathi; Muroidea; Muridae; Murinae; Mus; Mus	PF12796.4^Ank_2^Ankyrin repeats (3 copies)^65-134^E:2.4e-09`PF13606.3^Ank_3^Ankyrin repeat^70-98^E:0.0012`PF13637.3^Ank_4^Ankyrin repeats (many copies)^74-125^E:2.7e-10`PF13637.3^Ank_4^Ankyrin repeats (many copies)^106-157^E:1.6e-05
4	myoblasts	CapteG118513	6.43e-15	0.838571	0.377	0.126	1.06e-10	MYS_ARGIR^MYS_ARGIR^Q:22-1578,H:7-525^72.94%ID^E:0^RecName: Full=Myosin heavy chain, striated muscle;^Eukaryota; Metazoa; Lophotrochozoa; Mollusca; Bivalvia; Pteriomorphia; Pectinoida; Pectinoidea; Pectinidae; Argopecten	PF02736.16^Myosin_N^Myosin N-terminal SH3-like domain^31-70^E:2.8e-13`PF00063.18^Myosin_head^Myosin head (motor domain)^85-526^E:3.4e-197
4	myoblasts	CapteG221034	2.65e-07	0.475035	0.292	0.126	0.00436152	ACH1_CAEBR^ACH1_CAEBR^Q:355-993,H:14-228^26.48%ID^E:2e-15^RecName: Full=Acetylcholine receptor subunit alpha-type acr-16 {ECO:0000250|UniProtKB:P48180};^Eukaryota; Metazoa; Ecdysozoa; Nematoda; Chromadorea; Rhabditida; Rhabditoidea; Rhabditidae; Peloderinae; Caenorhabditis	PF02931.20^Neur_chan_LBD^Neurotransmitter-gated ion-channel ligand binding domain^103-307^E:3.1e-25
4	myoblasts	CapteG100595	1.21e-10	0.605508	0.34	0.127	1.99e-06	BP10_PARLI^BP10_PARLI^Q:4-186,H:339-399^44.26%ID^E:1e-11^RecName: Full=Blastula protease 10;^Eukaryota; Metazoa; Echinodermata; Eleutherozoa; Echinozoa; Echinoidea; Euechinoidea; Echinacea; Echinoida; Echinidae; Paracentrotus	PF00431.17^CUB^CUB domain^2-62^E:1.5e-14
4	myoblasts	CapteG209191	1.02e-08	0.537806	0.311	0.127	0.000167407	.	.
4	myoblasts	CapteG222521	4.96e-08	0.412152	0.311	0.127	0.000814168	LRP5_HUMAN^LRP5_HUMAN^Q:198-827,H:31-238^63.98%ID^E:2e-85^RecName: Full=Low-density lipoprotein receptor-related protein 5;^Eukaryota; Metazoa; Chordata; Craniata; Vertebrata; Euteleostomi; Mammalia; Eutheria; Euarchontoglires; Primates; Haplorrhini; Catarrhini; Hominidae; Homo`LRP5_HUMAN^LRP5_HUMAN^Q:207-815,H:343-542^42.86%ID^E:3e-47^RecName: Full=Low-density lipoprotein receptor-related protei…	PF00058.14^Ldl_recept_b^Low-density lipoprotein receptor repeat class B^108-148^E:2.6e-11`PF00058.14^Ldl_recept_b^Low-density lipoprotein receptor repeat class B^151-194^E:5e-14
4	myoblasts	tRNA-Trp	1.21e-06	0.377108	0.292	0.127	0.0199241
4	myoblasts	tRNA-Gly.46	5.93e-07	0.446159	0.292	0.128	0.00974822
4	myoblasts	CapteG136270	1.6e-08	0.44337	0.321	0.128	0.000263407	.	.
4	myoblasts	CapteG155968	6.88e-05	0.312739	0.264	0.128	1
4	myoblasts	CapteG124709	0.000212259	0.374075	0.255	0.131	1
4	myoblasts	CapteG221526	0.000350663	0.324634	0.255	0.131	1
4	myoblasts	CapteG227020	1.12e-05	0.297706	0.283	0.131	0.184597
4	myoblasts	CapteG213492	0.000116528	0.259448	0.264	0.131	1
4	myoblasts	CapteG130010	4.32e-10	0.588488	0.34	0.132	7.1e-06	SNX27_MOUSE^SNX27_MOUSE^Q:67-1533,H:39-525^57.32%ID^E:0^RecName: Full=Sorting nexin-27;^Eukaryota; Metazoa; Chordata; Craniata; Vertebrata; Euteleostomi; Mammalia; Eutheria; Euarchontoglires; Glires; Rodentia; Sciurognathi; Muroidea; Muridae; Murinae; Mus; Mus	PF00595.21^PDZ^PDZ domain (Also known as DHR or GLGF)^28-114^E:3.3e-16`PF00787.21^PX^PX domain^160-246^E:2.2e-20`PF00788.20^RA^Ras association (RalGDS/AF-6) domain^262-345^E:1.7e-07
4	myoblasts	CapteG210368	9.35e-05	0.392681	0.264	0.132	1	BRX1_BOVIN^BRX1_BOVIN^Q:103-867,H:53-309^65.76%ID^E:3e-125^RecName: Full=Ribosome biogenesis protein BRX1 homolog;^Eukaryota; Metazoa; Chordata; Craniata; Vertebrata; Euteleostomi; Mammalia; Eutheria; Laurasiatheria; Cetartiodactyla; Ruminantia; Pecora; Bovidae; Bovinae; Bos	PF04427.15^Brix^Brix domain^49-224^E:1.8e-41
4	myoblasts	CapteG89666	3.55e-05	0.380817	0.274	0.132	0.583017	GSCR2_HUMAN^GSCR2_HUMAN^Q:184-405,H:401-474^56.76%ID^E:5e-18^RecName: Full=Glioma tumor suppressor candidate region gene 2 protein;^Eukaryota; Metazoa; Chordata; Craniata; Vertebrata; Euteleostomi; Mammalia; Eutheria; Euarchontoglires; Primates; Haplorrhini; Catarrhini; Hominidae; Homo	PF07767.8^Nop53^Nop53 (60S ribosomal biogenesis)^30-106^E:1.7e-21
4	myoblasts	CapteG77981	4.86e-06	0.293038	0.292	0.132	0.0798782
4	myoblasts	CapteG187074	4.86e-06	0.337394	0.292	0.133	0.079768
4	myoblasts	CapteG219121	2.36e-05	0.297405	0.283	0.134	0.388182
4	myoblasts	CapteG214489	8.88e-08	0.409043	0.321	0.135	0.00145861	.	.
4	myoblasts	CapteG220967	5.03e-09	0.459735	0.34	0.137	8.27e-05	.	.
4	myoblasts	CapteG208350	4.67e-07	0.49576	0.311	0.138	0.00767986	.	.
4	myoblasts	tRNA-Leu	0.000256855	0.373172	0.264	0.14	1
4	myoblasts	CapteG95444	0.0001754	0.354039	0.264	0.14	1
4	myoblasts	CapteG188595	0.000356708	0.306261	0.264	0.14	1
4	myoblasts	CapteG113921	1.87e-08	0.540715	0.34	0.141	0.000306866	.	.
4	myoblasts	CapteG193295	2.53e-07	0.428815	0.321	0.142	0.00414963	.	.
4	myoblasts	CapteG187243	0.000176154	0.375367	0.274	0.142	1
4	myoblasts	CapteG201600	0.000760924	0.297151	0.264	0.143	1
4	myoblasts	CapteG201559	0.000101646	0.280988	0.283	0.143	1
4	myoblasts	CapteG146325	0.000890086	0.396751	0.264	0.145	1	STOM_HUMAN^STOM_HUMAN^Q:1-315,H:28-133^62.26%ID^E:1e-39^RecName: Full=Erythrocyte band 7 integral membrane protein;^Eukaryota; Metazoa; Chordata; Craniata; Vertebrata; Euteleostomi; Mammalia; Eutheria; Euarchontoglires; Primates; Haplorrhini; Catarrhini; Hominidae; Homo	PF01145.22^Band_7^SPFH domain / Band 7 family^29-101^E:4.7e-12
4	myoblasts	CapteG76477	3.52e-05	0.322151	0.292	0.145	0.579077
4	myoblasts	CapteG102045	7.14e-06	0.572249	0.292	0.146	0.11739	.	.
4	myoblasts	CapteG119119	0.00102481	0.589715	0.255	0.147	1	.	.
4	myoblasts	CapteG108416	4.11e-10	0.559702	0.368	0.147	6.75e-06	WDHD1_XENLA^WDHD1_XENLA^Q:13-2358,H:3-806^41.88%ID^E:0^RecName: Full=WD repeat and HMG-box DNA-binding protein 1;^Eukaryota; Metazoa; Chordata; Craniata; Vertebrata; Euteleostomi; Amphibia; Batrachia; Anura; Pipoidea; Pipidae; Xenopodinae; Xenopus; Xenopus	PF00400.29^WD40^WD domain, G-beta repeat^131-165^E:3.1e-06`PF00400.29^WD40^WD domain, G-beta repeat^227-258^E:0.016`PF12341.5^Mcl1_mid^Minichromosome loss protein, Mcl1, middle region^401-685^E:1.2e-86
4	myoblasts	CapteG151304	0.000334821	0.371846	0.274	0.147	1
4	myoblasts	CapteG220295	0.00259352	0.274224	0.255	0.147	1
4	myoblasts	CapteG220370	7.88e-11	0.678935	0.377	0.148	1.29e-06	VEGFB_HUMAN^VEGFB_HUMAN^Q:33-305,H:45-129^36.56%ID^E:9e-08^RecName: Full=Vascular endothelial growth factor B;^Eukaryota; Metazoa; Chordata; Craniata; Vertebrata; Euteleostomi; Mammalia; Eutheria; Euarchontoglires; Primates; Haplorrhini; Catarrhini; Hominidae; Homo	PF00341.14^PDGF^PDGF/VEGF domain^9-92^E:1.6e-14`PF03128.11^CXCXC^CXCXC repeat^129-141^E:0.032
4	myoblasts	CapteG205549	3.9e-09	0.457757	0.358	0.148	6.4e-05	KDM8_RAT^KDM8_RAT^Q:70-726,H:185-414^27.23%ID^E:2e-11^RecName: Full=Lysine-specific demethylase 8;^Eukaryota; Metazoa; Chordata; Craniata; Vertebrata; Euteleostomi; Mammalia; Eutheria; Euarchontoglires; Glires; Rodentia; Sciurognathi; Muroidea; Muridae; Murinae; Rattus	PF13621.3^Cupin_8^Cupin-like domain^30-243^E:2.1e-23
4	myoblasts	CapteG192675	4.84e-05	0.346782	0.292	0.148	0.795955
4	myoblasts	CapteG188373	2.78e-06	0.364547	0.321	0.149	0.0457272
4	myoblasts	CapteG175609	1.47e-05	0.28276	0.311	0.149	0.241552
4	myoblasts	CapteG129062	2.94e-05	0.471087	0.292	0.15	0.483395	.	.
4	myoblasts	CapteG217531	8.73e-14	0.673775	0.415	0.151	1.43e-09	.	.
4	myoblasts	CapteG188612	9.81e-05	0.376064	0.292	0.151	1
4	myoblasts	CapteG207756	0.000272386	0.505969	0.274	0.152	1	NEK4_HUMAN^NEK4_HUMAN^Q:37-957,H:12-320^40.76%ID^E:4e-74^RecName: Full=Serine/threonine-protein kinase Nek4;^Eukaryota; Metazoa; Chordata; Craniata; Vertebrata; Euteleostomi; Mammalia; Eutheria; Euarchontoglires; Primates; Haplorrhini; Catarrhini; Hominidae; Homo	PF00069.22^Pkinase^Protein kinase domain^7-267^E:1.4e-65`PF07714.14^Pkinase_Tyr^Protein tyrosine kinase^9-262^E:1.8e-43
4	myoblasts	CapteG223578	1.64e-06	0.472121	0.321	0.152	0.0269835	RN213_MOUSE^RN213_MOUSE^Q:5983-15675,H:1758-5142^33.45%ID^E:0^RecName: Full=E3 ubiquitin-protein ligase RNF213;^Eukaryota; Metazoa; Chordata; Craniata; Vertebrata; Euteleostomi; Mammalia; Eutheria; Euarchontoglires; Glires; Rodentia; Sciurognathi; Muroidea; Muridae; Murinae; Mus; Mus`RN213_MOUSE^RN213_MOUSE^Q:3277-5595,H:960-1708^22.42%ID^E:7e-34^RecName: Full=E3 ubiquitin-protein ligase RNF213;^…	.
4	myoblasts	tRNA-Cys.16	0.00059877	0.329817	0.274	0.152	1
4	myoblasts	CapteG225288	3.86e-19	0.753488	0.472	0.153	6.34e-15	RER1_RAT^RER1_RAT^Q:135-683,H:7-190^69.02%ID^E:5e-85^RecName: Full=Protein RER1;^Eukaryota; Metazoa; Chordata; Craniata; Vertebrata; Euteleostomi; Mammalia; Eutheria; Euarchontoglires; Glires; Rodentia; Sciurognathi; Muroidea; Muridae; Murinae; Rattus	PF03248.10^Rer1^Rer1 family^23-185^E:9.6e-76
4	myoblasts	CapteG39091	9.01e-19	0.726852	0.472	0.153	1.48e-14	PKRI1_XENLA^PKRI1_XENLA^Q:1-321,H:12-115^50.47%ID^E:5e-27^RecName: Full=PRKR-interacting protein 1 homolog;^Eukaryota; Metazoa; Chordata; Craniata; Vertebrata; Euteleostomi; Amphibia; Batrachia; Anura; Pipoidea; Pipidae; Xenopodinae; Xenopus; Xenopus	PF06658.9^DUF1168^Protein of unknown function (DUF1168)^30-139^E:5.4e-34
4	myoblasts	CapteG198253	3.52e-07	0.339361	0.34	0.153	0.0057803
4	myoblasts	CapteG116299	2.49e-10	0.484742	0.387	0.154	4.09e-06	ZN583_HUMAN^ZN583_HUMAN^Q:13-438,H:377-521^53.79%ID^E:9e-46^RecName: Full=Zinc finger protein 583;^Eukaryota; Metazoa; Chordata; Craniata; Vertebrata; Euteleostomi; Mammalia; Eutheria; Euarchontoglires; Primates; Haplorrhini; Catarrhini; Hominidae; Homo`ZN583_HUMAN^ZN583_HUMAN^Q:13-417,H:405-542^55.8%ID^E:1e-44^RecName: Full=Zinc finger protein 583;^Eukaryota; Metazoa; Chordata; Craniata; Vertebr…	PF13894.3^zf-C2H2_4^C2H2-type zinc finger^8-30^E:0.0012`PF13912.3^zf-C2H2_6^C2H2-type zinc finger^8-30^E:0.0012`PF12874.4^zf-met^Zinc-finger of C2H2 type^9-29^E:0.0011`PF13913.3^zf-C2HC_2^zinc-finger of a C2HC-type^9-28^E:0.61`PF13465.3^zf-H2C2_2^Zinc-finger double domain^22-46^E:9.3e-11`PF12874.4^zf-met^Zinc-finger of C2H2 type^36-57^E:0.015`PF13912.3^zf-C2H2_6^C2H2-type zinc finger^36-46^E:0.02…
4	myoblasts	CapteG144246	9.68e-09	0.538641	0.358	0.155	0.000158975	ZN363_MOUSE^ZN363_MOUSE^Q:25-735,H:19-253^54.01%ID^E:3e-90^RecName: Full=RING finger and CHY zinc finger domain-containing protein 1;^Eukaryota; Metazoa; Chordata; Craniata; Vertebrata; Euteleostomi; Mammalia; Eutheria; Euarchontoglires; Glires; Rodentia; Sciurognathi; Muroidea; Muridae; Murinae; Mus; Mus	PF05495.9^zf-CHY^CHY zinc finger^10-82^E:3.1e-19`PF13639.3^zf-RING_2^Ring finger domain^135-178^E:3.6e-08`PF13923.3^zf-C3HC4_2^Zinc finger, C3HC4 type (RING finger)^135-178^E:3.8e-07`PF00097.22^zf-C3HC4^Zinc finger, C3HC4 type (RING finger)^136-178^E:2.7e-06`PF13445.3^zf-RING_UBOX^RING-type zinc-finger^136-176^E:1e-05`PF14599.3^zinc_ribbon_6^Zinc-ribbon^185-241^E:3.6e-25
4	myoblasts	CapteG207388	0.0064318	0.277022	0.255	0.155	1
4	myoblasts	CapteG199823	2.33e-07	0.417091	0.349	0.156	0.00383638	.	.
4	myoblasts	CapteG227374	5.9e-05	0.372887	0.302	0.156	0.9688
4	myoblasts	CapteG214498	9.5e-05	0.29856	0.311	0.16	1
4	myoblasts	CapteG226595	2.32e-40	1.32855	0.613	0.161	3.82e-36	.	.
4	myoblasts	CapteG196020	0.0013733	0.257221	0.283	0.161	1
4	myoblasts	CapteG219423	1.35e-05	0.406588	0.321	0.162	0.221693	Y4MH_RHISN^Y4MH_RHISN^Q:489-839,H:184-297^27.35%ID^E:1e-15^RecName: Full=Uncharacterized protein y4mH;^Bacteria; Proteobacteria; Alphaproteobacteria; Rhizobiales; Rhizobiaceae; Sinorhizobium/Ensifer group; Sinorhizobium`Y4MH_RHISN^Y4MH_RHISN^Q:100-402,H:76-185^25.45%ID^E:1e-15^RecName: Full=Uncharacterized protein y4mH;^Bacteria; Proteobacteria; Alphaproteobacteria; Rhizobiales; Rhizobiaceae; Sin…	PF04909.11^Amidohydro_2^Amidohydrolase^34-134^E:1.1e-07
4	myoblasts	CapteG171238	5.64e-06	0.482784	0.321	0.163	0.0927124	FACE1_MOUSE^FACE1_MOUSE^Q:99-1451,H:15-470^63.24%ID^E:0^RecName: Full=CAAX prenyl protease 1 homolog;^Eukaryota; Metazoa; Chordata; Craniata; Vertebrata; Euteleostomi; Mammalia; Eutheria; Euarchontoglires; Glires; Rodentia; Sciurognathi; Muroidea; Muridae; Murinae; Mus; Mus	PF16491.2^Peptidase_M48_N^CAAX prenyl protease N-terminal, five membrane helices^32-217^E:1.8e-62`PF01435.15^Peptidase_M48^Peptidase family M48^220-458^E:3.1e-58
4	myoblasts	CapteG187058	0.000581318	0.354262	0.283	0.163	1
4	myoblasts	CapteG205630	0.000452697	0.289182	0.292	0.163	1
4	myoblasts	CapteG202172	0.000210281	0.296448	0.302	0.165	1
4	myoblasts	CapteG152709	6.3e-07	0.627598	0.34	0.166	0.0103581	SODM_MACFA^SODM_MACFA^Q:47-706,H:1-222^68.47%ID^E:8e-110^RecName: Full=Superoxide dismutase [Mn], mitochondrial;^Eukaryota; Metazoa; Chordata; Craniata; Vertebrata; Euteleostomi; Mammalia; Eutheria; Euarchontoglires; Primates; Haplorrhini; Catarrhini; Cercopithecidae; Cercopithecinae; Macaca	PF00081.19^Sod_Fe_N^Iron/manganese superoxide dismutases, alpha-hairpin domain^23-104^E:4.6e-33`PF02777.15^Sod_Fe_C^Iron/manganese superoxide dismutases, C-terminal domain^111-214^E:6.1e-37
4	myoblasts	CapteG56156	1.46e-07	0.484151	0.358	0.167	0.00239432	PARI_MOUSE^PARI_MOUSE^Q:1-321,H:165-271^44.86%ID^E:2e-24^RecName: Full=PCNA-interacting partner;^Eukaryota; Metazoa; Chordata; Craniata; Vertebrata; Euteleostomi; Mammalia; Eutheria; Euarchontoglires; Glires; Rodentia; Sciurognathi; Muroidea; Muridae; Murinae; Mus; Mus	.
4	myoblasts	CapteG215103	1.08e-06	0.412051	0.349	0.167	0.0176663	.	.
4	myoblasts	CapteG218143	8.81e-05	0.345123	0.311	0.167	1
4	myoblasts	CapteG158876	1.1e-11	0.499517	0.425	0.168	1.81e-07	FBF1_CHICK^FBF1_CHICK^Q:7-828,H:861-1127^28.32%ID^E:6e-23^RecName: Full=Fas-binding factor 1 homolog;^Eukaryota; Metazoa; Chordata; Craniata; Vertebrata; Euteleostomi; Archelosauria; Archosauria; Dinosauria; Saurischia; Theropoda; Coelurosauria; Aves; Neognathae; Galloanserae; Galliformes; Phasianidae; Phasianinae; Gallus	.
4	myoblasts	CapteG219460	0.000370107	0.359782	0.302	0.168	1
4	myoblasts	tRNA-Val.27	0.00108704	0.352522	0.292	0.17	1
4	myoblasts	CapteG80743	4.93e-05	0.417095	0.321	0.171	0.809704	ANPRB_HUMAN^ANPRB_HUMAN^Q:10-207,H:825-890^69.7%ID^E:2e-24^RecName: Full=Atrial natriuretic peptide receptor 2;^Eukaryota; Metazoa; Chordata; Craniata; Vertebrata; Euteleostomi; Mammalia; Eutheria; Euarchontoglires; Primates; Haplorrhini; Catarrhini; Hominidae; Homo	PF07701.11^HNOBA^Heme NO binding associated^1-25^E:2.9e-06`PF00211.17^Guanylate_cyc^Adenylate and Guanylate cyclase catalytic domain^32-69^E:5.6e-10
4	myoblasts	CapteG228571	7.52e-05	0.338525	0.321	0.171	1
4	myoblasts	CapteG207579	0.000151763	0.301838	0.321	0.171	1
4	myoblasts	CapteG151490	0.00061913	0.264341	0.302	0.171	1
4	myoblasts	CapteG207971	6.81e-54	1.67611	0.708	0.172	1.12e-49	.	.
4	myoblasts	CapteG214604	1.53e-07	0.529086	0.368	0.172	0.00251526	THTM_ECOLI^THTM_ECOLI^Q:25-324,H:6-109^33.96%ID^E:5e-16^RecName: Full=3-mercaptopyruvate sulfurtransferase;^Bacteria; Proteobacteria; Gammaproteobacteria; Enterobacteriales; Enterobacteriaceae; Escherichia	PF00581.17^Rhodanese^Rhodanese-like domain^13-108^E:1.2e-06
4	myoblasts	CapteG81082	0.000168277	0.396768	0.311	0.172	1	MYNN_DANRE^MYNN_DANRE^Q:7-156,H:473-522^38%ID^E:8e-06^RecName: Full=Myoneurin;^Eukaryota; Metazoa; Chordata; Craniata; Vertebrata; Euteleostomi; Actinopterygii; Neopterygii; Teleostei; Ostariophysi; Cypriniformes; Cyprinidae; Danio	PF13894.3^zf-C2H2_4^C2H2-type zinc finger^4-24^E:0.0003`PF12874.4^zf-met^Zinc-finger of C2H2 type^4-24^E:0.059
4	myoblasts	CapteG167487	0.00118394	0.362361	0.292	0.172	1
4	myoblasts	CapteG222152	0.00010479	0.305996	0.321	0.172	1
4	myoblasts	CapteG125837	8.34e-11	0.809685	0.406	0.173	1.37e-06	DHRS9_HUMAN^DHRS9_HUMAN^Q:97-672,H:27-215^48.44%ID^E:1e-56^RecName: Full=Dehydrogenase/reductase SDR family member 9;^Eukaryota; Metazoa; Chordata; Craniata; Vertebrata; Euteleostomi; Mammalia; Eutheria; Euarchontoglires; Primates; Haplorrhini; Catarrhini; Hominidae; Homo	PF00106.22^adh_short^short chain dehydrogenase^36-220^E:4.1e-36`PF13561.3^adh_short_C2^Enoyl-(Acyl carrier protein) reductase^43-216^E:5.1e-24
4	myoblasts	tRNA-Ile.14	3.96e-06	0.434833	0.34	0.173	0.0650276
4	myoblasts	CapteG105153	0.000101907	0.290186	0.33	0.174	1
4	myoblasts	CapteG191156	0.00137301	0.305513	0.292	0.176	1
4	myoblasts	CapteG203434	0.000370988	0.361943	0.311	0.177	1
4	myoblasts	CapteG193545	0.00651106	0.280669	0.283	0.179	1
4	myoblasts	CapteG127338	3.78e-42	1.24431	0.67	0.18	6.21e-38	UBN2_BOVIN^UBN2_BOVIN^Q:1-186,H:598-659^50%ID^E:7e-18^RecName: Full=Ubinuclein-2;^Eukaryota; Metazoa; Chordata; Craniata; Vertebrata; Euteleostomi; Mammalia; Eutheria; Laurasiatheria; Cetartiodactyla; Ruminantia; Pecora; Bovidae; Bovinae; Bos	PF14075.3^UBN_AB^Ubinuclein conserved middle domain^2-62^E:1.2e-25
4	myoblasts	U5.6	8.72e-10	0.629901	0.406	0.18	1.43e-05
4	myoblasts	CapteG51095	9.33e-20	0.861924	0.519	0.181	1.53e-15	AGRB2_PONAB^AGRB2_PONAB^Q:1-159,H:297-349^43.4%ID^E:3e-07^RecName: Full=Adhesion G protein-coupled receptor B2;^Eukaryota; Metazoa; Chordata; Craniata; Vertebrata; Euteleostomi; Mammalia; Eutheria; Euarchontoglires; Primates; Haplorrhini; Catarrhini; Hominidae; Pongo	PF00090.16^TSP_1^Thrombospondin type 1 domain^5-53^E:4.6e-14
4	myoblasts	CapteG192909	0.00224916	0.250788	0.302	0.181	1
4	myoblasts	CapteG212382	7.23e-05	0.340284	0.34	0.183	1
4	myoblasts	CapteG191292	0.000826941	0.302568	0.311	0.183	1
4	myoblasts	tRNA-Ile.23	2.05e-09	0.541425	0.415	0.184	3.37e-05
4	myoblasts	CapteG28785	4.32e-06	0.55212	0.349	0.185	0.070945	USH2A_HUMAN^USH2A_HUMAN^Q:1-159,H:575-643^36.23%ID^E:1e-06^RecName: Full=Usherin;^Eukaryota; Metazoa; Chordata; Craniata; Vertebrata; Euteleostomi; Mammalia; Eutheria; Euarchontoglires; Primates; Haplorrhini; Catarrhini; Hominidae; Homo`USH2A_HUMAN^USH2A_HUMAN^Q:1-159,H:747-797^39.62%ID^E:7e-06^RecName: Full=Usherin;^Eukaryota; Metazoa; Chordata; Craniata; Vertebrata; Euteleostomi; Mammalia; Euth…	PF00053.21^Laminin_EGF^Laminin EGF domain^1-48^E:3e-08
4	myoblasts	CapteG205950	0.000723537	0.304766	0.321	0.187	1
4	myoblasts	CapteG5792	0.00272094	0.251947	0.311	0.187	1
4	myoblasts	CapteG163321	0.000413235	0.374644	0.321	0.188	1
4	myoblasts	CapteG173907	3.16e-06	0.70656	0.349	0.19	0.0519319	DEGS1_BOVIN^DEGS1_BOVIN^Q:1-942,H:1-314^57.96%ID^E:6e-139^RecName: Full=Sphingolipid delta(4)-desaturase DES1;^Eukaryota; Metazoa; Chordata; Craniata; Vertebrata; Euteleostomi; Mammalia; Eutheria; Laurasiatheria; Cetartiodactyla; Ruminantia; Pecora; Bovidae; Bovinae; Bos	PF08557.7^Lipid_DES^Sphingolipid Delta4-desaturase (DES)^6-41^E:5.2e-21`PF00487.21^FA_desaturase^Fatty acid desaturase^66-291^E:6.4e-24
4	myoblasts	CapteG78295	4.3e-07	0.588721	0.377	0.19	0.00707157	C102B_HUMAN^C102B_HUMAN^Q:22-195,H:81-138^68.97%ID^E:3e-19^RecName: Full=Coiled-coil domain-containing protein 102B;^Eukaryota; Metazoa; Chordata; Craniata; Vertebrata; Euteleostomi; Mammalia; Eutheria; Euarchontoglires; Primates; Haplorrhini; Catarrhini; Hominidae; Homo	.
4	myoblasts	CapteG203186	6.27e-07	0.495037	0.387	0.192	0.0102992	SLLC1_DABSI^SLLC1_DABSI^Q:7-345,H:1-107^27.43%ID^E:1e-05^RecName: Full=Snaclec coagulation factor X-activating enzyme light chain 1;^Eukaryota; Metazoa; Chordata; Craniata; Vertebrata; Euteleostomi; Lepidosauria; Squamata; Bifurcata; Unidentata; Episquamata; Toxicofera; Serpentes; Colubroidea; Viperidae; Viperinae; Daboia	PF00059.18^Lectin_C^Lectin C-type domain^52-169^E:1.7e-11
4	myoblasts	U1.12	1.8e-06	0.492923	0.368	0.192	0.0295146
4	myoblasts	CapteG130039	2.99e-10	0.602221	0.425	0.193	4.92e-06	ROR1_MOUSE^ROR1_MOUSE^Q:1-234,H:318-395^47.44%ID^E:5e-19^RecName: Full=Inactive tyrosine-protein kinase transmembrane receptor ROR1 {ECO:0000250|UniProtKB:Q01973};^Eukaryota; Metazoa; Chordata; Craniata; Vertebrata; Euteleostomi; Mammalia; Eutheria; Euarchontoglires; Glires; Rodentia; Sciurognathi; Muroidea; Muridae; Murinae; Mus; Mus	PF00051.15^Kringle^Kringle domain^1-74^E:2.3e-22
4	myoblasts	CapteG189882	6.28e-14	0.601716	0.481	0.193	1.03e-09	TLR4_HORSE^TLR4_HORSE^Q:106-699,H:40-236^29.56%ID^E:6e-12^RecName: Full=Toll-like receptor 4;^Eukaryota; Metazoa; Chordata; Craniata; Vertebrata; Euteleostomi; Mammalia; Eutheria; Laurasiatheria; Perissodactyla; Equidae; Equus	PF13855.3^LRR_8^Leucine rich repeat^54-111^E:1.5e-12`PF13306.3^LRR_5^Leucine rich repeats (6 copies)^61-151^E:0.03`PF13306.3^LRR_5^Leucine rich repeats (6 copies)^199-242^E:0.58
4	myoblasts	CapteG142937	2.08e-06	0.601084	0.368	0.193	0.0340946	INE_DROME^INE_DROME^Q:4-1650,H:335-877^47.28%ID^E:4e-171^RecName: Full=Sodium- and chloride-dependent GABA transporter ine;^Eukaryota; Metazoa; Ecdysozoa; Arthropoda; Hexapoda; Insecta; Pterygota; Neoptera; Endopterygota; Diptera; Brachycera; Muscomorpha; Ephydroidea; Drosophilidae; Drosophila; Sophophora	PF00209.15^SNF^Sodium:neurotransmitter symporter family^4-530^E:5.6e-194
4	myoblasts	CapteG202274	0.000965439	0.264837	0.33	0.195	1
4	myoblasts	CapteG214483	6.84e-08	0.494043	0.406	0.196	0.00112445	.	.
4	myoblasts	CapteG200834	0.0124713	0.303916	0.302	0.196	1
4	myoblasts	CapteG217679	0.0121514	0.277876	0.302	0.196	1
4	myoblasts	CapteG208362	3.46e-07	0.407942	0.406	0.199	0.00568936	.	.
4	myoblasts	CapteG191416	4.77e-08	0.420233	0.425	0.2	0.000783567	.	.
4	myoblasts	CapteG191586	1.23e-05	0.372928	0.377	0.2	0.202012
4	myoblasts	CapteG205217	2.9e-05	0.512381	0.358	0.202	0.476065	AGRB3_MOUSE^AGRB3_MOUSE^Q:595-822,H:429-507^36.71%ID^E:6e-07^RecName: Full=Adhesion G protein-coupled receptor B3;^Eukaryota; Metazoa; Chordata; Craniata; Vertebrata; Euteleostomi; Mammalia; Eutheria; Euarchontoglires; Glires; Rodentia; Sciurognathi; Muroidea; Muridae; Murinae; Mus; Mus	PF00024.23^PAN_1^PAN domain^141-188^E:5.5e-06`PF14295.3^PAN_4^PAN domain^142-179^E:0.00098`PF00090.16^TSP_1^Thrombospondin type 1 domain^227-274^E:9.2e-09
4	myoblasts	CapteG192303	0.000659541	0.381061	0.33	0.203	1	.	.
4	myoblasts	CapteG71272	9.1e-05	0.375095	0.358	0.203	1
4	myoblasts	CapteG206212	0.00523207	0.259982	0.321	0.203	1
4	myoblasts	CapteG192300	1.75e-15	0.856771	0.509	0.204	2.87e-11	.	PF04577.11^DUF563^Protein of unknown function (DUF563)^275-475^E:1.7e-26
4	myoblasts	CapteG198764	9.96e-07	0.566289	0.387	0.204	0.0163577	.	.
4	myoblasts	CapteG156711	1.5e-07	0.517848	0.406	0.204	0.00247252	HYEP_PIG^HYEP_PIG^Q:206-1435,H:31-448^49.04%ID^E:3e-137^RecName: Full=Epoxide hydrolase 1;^Eukaryota; Metazoa; Chordata; Craniata; Vertebrata; Euteleostomi; Mammalia; Eutheria; Laurasiatheria; Cetartiodactyla; Suina; Suidae; Sus	PF06441.9^EHN^Epoxide hydrolase N terminus^49-156^E:2.5e-35`PF00561.17^Abhydrolase_1^alpha/beta hydrolase fold^141-268^E:1.5e-21
4	myoblasts	CapteG205235	3.38e-31	1.05323	0.66	0.206	5.55e-27	.	.
4	myoblasts	CapteG191195	2.02e-06	0.338081	0.406	0.206	0.0331986
4	myoblasts	CapteG225922	0.000227241	0.303334	0.358	0.206	1
4	myoblasts	CapteG205364	1.81e-07	0.475555	0.425	0.207	0.00297141	UD11_RAT^UD11_RAT^Q:598-912,H:404-510^37.04%ID^E:6e-15^RecName: Full=UDP-glucuronosyltransferase 1-1;^Eukaryota; Metazoa; Chordata; Craniata; Vertebrata; Euteleostomi; Mammalia; Eutheria; Euarchontoglires; Glires; Rodentia; Sciurognathi; Muroidea; Muridae; Murinae; Rattus	PF00201.15^UDPGT^UDP-glucoronosyl and UDP-glucosyl transferase^199-310^E:8.3e-17
4	myoblasts	tRNA-Ser.11	0.000135866	0.329851	0.358	0.207	1
4	myoblasts	CapteG206678	0.00701669	0.28934	0.321	0.208	1
4	myoblasts	CapteG168582	2.35e-09	0.503931	0.443	0.209	3.85e-05	WDR88_HUMAN^WDR88_HUMAN^Q:128-1186,H:89-444^38.1%ID^E:4e-81^RecName: Full=WD repeat-containing protein 88;^Eukaryota; Metazoa; Chordata; Craniata; Vertebrata; Euteleostomi; Mammalia; Eutheria; Euarchontoglires; Primates; Haplorrhini; Catarrhini; Hominidae; Homo	PF00400.29^WD40^WD domain, G-beta repeat^46-80^E:0.13`PF00400.29^WD40^WD domain, G-beta repeat^87-125^E:0.02`PF00400.29^WD40^WD domain, G-beta repeat^138-167^E:0.0038`PF00400.29^WD40^WD domain, G-beta repeat^217-252^E:6.2e-05`PF00400.29^WD40^WD domain, G-beta repeat^268-299^E:0.0002`PF00400.29^WD40^WD domain, G-beta repeat^309-341^E:6.8e-08
4	myoblasts	CapteG171636	8.68e-05	0.354958	0.368	0.209	1
4	myoblasts	CapteG181634	0.000921738	0.3219	0.349	0.209	1
4	myoblasts	CapteG202536	0.022273	0.31271	0.292	0.209	1
4	myoblasts	CapteG223184	3.68e-09	0.651257	0.434	0.21	6.05e-05	CNOT4_HUMAN^CNOT4_HUMAN^Q:556-1110,H:60-244^80.54%ID^E:1e-79^RecName: Full=CCR4-NOT transcription complex subunit 4;^Eukaryota; Metazoa; Chordata; Craniata; Vertebrata; Euteleostomi; Mammalia; Eutheria; Euarchontoglires; Primates; Haplorrhini; Catarrhini; Hominidae; Homo`CNOT4_HUMAN^CNOT4_HUMAN^Q:13-162,H:9-58^94%ID^E:7e-27^RecName: Full=CCR4-NOT transcription complex subunit 4;^Eukaryota; Metazo…	PF14570.3^zf-RING_4^RING/Ubox like zinc-binding domain^10-54^E:5.6e-17`PF00076.19^RRM_1^RNA recognition motif. (a.k.a. RRM, RBD, or RNP domain)^248-313^E:9.5e-07
4	myoblasts	CapteG208062	3.04e-07	0.590902	0.406	0.21	0.00498904	.	PF00098.20^zf-CCHC^Zinc knuckle^557-572^E:0.00032`PF14392.3^zf-CCHC_4^Zinc knuckle^557-572^E:0.46
4	myoblasts	CapteG131383	8.39e-05	0.419429	0.368	0.21	1	.	.
4	myoblasts	CapteG219126	0.000228038	0.408623	0.358	0.21	1	.	.
4	myoblasts	bantam	0.000367757	0.387945	0.349	0.211	1
4	myoblasts	CapteG203228	0.00292773	0.259303	0.33	0.212	1
4	myoblasts	CapteG209661	5.3e-09	0.557818	0.453	0.215	8.72e-05	.	.
4	myoblasts	CapteG221936	0.00149011	0.408944	0.33	0.215	1	ABCB6_RAT^ABCB6_RAT^Q:4-1566,H:324-836^66.22%ID^E:0^RecName: Full=ATP-binding cassette sub-family B member 6, mitochondrial;^Eukaryota; Metazoa; Chordata; Craniata; Vertebrata; Euteleostomi; Mammalia; Eutheria; Euarchontoglires; Glires; Rodentia; Sciurognathi; Muroidea; Muridae; Murinae; Rattus	PF00664.20^ABC_membrane^ABC transporter transmembrane region^1-229^E:4.9e-31`PF00005.24^ABC_tran^ABC transporter^291-440^E:1.4e-36
4	myoblasts	CapteG189335	0.000936613	0.309458	0.358	0.215	1
4	myoblasts	CapteG228572	0.000281367	0.316698	0.368	0.217	1
4	myoblasts	CapteG186188	1.66e-08	0.484302	0.453	0.218	0.000272987	ANPRA_RAT^ANPRA_RAT^Q:154-1620,H:122-617^22.52%ID^E:6e-31^RecName: Full=Atrial natriuretic peptide receptor 1;^Eukaryota; Metazoa; Chordata; Craniata; Vertebrata; Euteleostomi; Mammalia; Eutheria; Euarchontoglires; Glires; Rodentia; Sciurognathi; Muroidea; Muridae; Murinae; Rattus	PF01094.25^ANF_receptor^Receptor family ligand binding region^17-340^E:2.3e-36`PF07714.14^Pkinase_Tyr^Protein tyrosine kinase^483-540^E:0.00018
4	myoblasts	CapteG186279	1.68e-12	0.706358	0.491	0.219	2.77e-08	MSOX_ARTST^MSOX_ARTST^Q:16-1170,H:7-383^27.96%ID^E:2e-36^RecName: Full=Monomeric sarcosine oxidase;^Bacteria; Actinobacteria; Micrococcales; Micrococcaceae; Arthrobacter	PF01266.21^DAO^FAD dependent oxidoreductase^8-370^E:6.4e-22
4	myoblasts	CapteG202271	7.75e-06	0.447662	0.396	0.22	0.127363	CPMD8_HUMAN^CPMD8_HUMAN^Q:982-1320,H:975-1087^31.86%ID^E:2e-08^RecName: Full=C3 and PZP-like alpha-2-macroglobulin domain-containing protein 8;^Eukaryota; Metazoa; Chordata; Craniata; Vertebrata; Euteleostomi; Mammalia; Eutheria; Euarchontoglires; Primates; Haplorrhini; Catarrhini; Hominidae; Homo	PF12248.5^Methyltransf_FA^Farnesoic acid 0-methyl transferase^338-438^E:5.2e-15
4	myoblasts	CapteG210046	4.72e-23	1.0112	0.594	0.221	7.76e-19	.	.
4	myoblasts	CapteG219570	9.07e-09	0.618739	0.443	0.221	0.000149056	.	.
4	myoblasts	CapteG185150	6.6e-11	0.602091	0.491	0.221	1.08e-06	FA65B_CHICK^FA65B_CHICK^Q:178-1011,H:50-327^38.16%ID^E:1e-57^RecName: Full=Protein FAM65B;^Eukaryota; Metazoa; Chordata; Craniata; Vertebrata; Euteleostomi; Archelosauria; Archosauria; Dinosauria; Saurischia; Theropoda; Coelurosauria; Aves; Neognathae; Galloanserae; Galliformes; Phasianidae; Phasianinae; Gallus	PF15903.2^PL48^Filopodia upregulated, FAM65^29-334^E:6.3e-68
4	myoblasts	CapteG114963	8.52e-07	0.446844	0.425	0.221	0.0140009	H3_URECA^H3_URECA^Q:1-408,H:1-136^100%ID^E:5e-94^RecName: Full=Histone H3;^Eukaryota; Metazoa; Lophotrochozoa; Annelida; Polychaeta; Echiura; Xenopneusta; Urechidae; Urechis	PF00125.21^Histone^Core histone H2A/H2B/H3/H4^1-132^E:7.9e-55
4	myoblasts	CapteG227013	0.121391	0.389912	0.283	0.221	1	.	PF13904.3^DUF4207^Domain of unknown function (DUF4207)^35-306^E:3e-17
4	myoblasts	CapteG154247	0.000235681	0.275422	0.377	0.222	1
4	myoblasts	CapteG72506	1.02e-08	0.558537	0.443	0.223	0.000166811	S28A3_RAT^S28A3_RAT^Q:4-1512,H:123-627^50.2%ID^E:5e-135^RecName: Full=Solute carrier family 28 member 3;^Eukaryota; Metazoa; Chordata; Craniata; Vertebrata; Euteleostomi; Mammalia; Eutheria; Euarchontoglires; Glires; Rodentia; Sciurognathi; Muroidea; Muridae; Murinae; Rattus	PF01773.17^Nucleos_tra2_N^Na+ dependent nucleoside transporter N-terminus^105-175^E:1e-22`PF07670.11^Gate^Nucleoside recognition^185-279^E:5e-06`PF07662.10^Nucleos_tra2_C^Na+ dependent nucleoside transporter C-terminus^287-504^E:9.8e-77
4	myoblasts	CapteG222520	4.85e-06	0.472133	0.406	0.223	0.0796737	.	PF15299.3^ALS2CR8^Amyotrophic lateral sclerosis 2 chromosomal region candidate gene 8^353-450^E:1.3e-10
4	myoblasts	CapteG112415	4.77e-07	0.469396	0.425	0.227	0.0078301	GSTO1_HUMAN^GSTO1_HUMAN^Q:1-660,H:12-229^40.69%ID^E:1e-43^RecName: Full=Glutathione S-transferase omega-1;^Eukaryota; Metazoa; Chordata; Craniata; Vertebrata; Euteleostomi; Mammalia; Eutheria; Euarchontoglires; Primates; Haplorrhini; Catarrhini; Hominidae; Homo	PF02798.17^GST_N^Glutathione S-transferase, N-terminal domain^11-81^E:1.3e-12`PF13417.3^GST_N_3^Glutathione S-transferase, N-terminal domain^14-86^E:1.6e-18`PF13409.3^GST_N_2^Glutathione S-transferase, N-terminal domain^19-82^E:2.5e-13`PF14497.3^GST_C_3^Glutathione S-transferase, C-terminal domain^125-205^E:1.3e-07`PF00043.22^GST_C^Glutathione S-transferase, C-terminal domain^139-201^E:4.7e-09
4	myoblasts	CapteG125307	4.99e-06	0.425029	0.425	0.23	0.081916	KLD8B_BOVIN^KLD8B_BOVIN^Q:1-546,H:11-203^31.63%ID^E:6e-18^RecName: Full=Kelch domain-containing protein 8B;^Eukaryota; Metazoa; Chordata; Craniata; Vertebrata; Euteleostomi; Mammalia; Eutheria; Laurasiatheria; Cetartiodactyla; Ruminantia; Pecora; Bovidae; Bovinae; Bos`KLD8B_BOVIN^KLD8B_BOVIN^Q:1-375,H:155-294^30.71%ID^E:1e-08^RecName: Full=Kelch domain-containing protein 8B;^Eukaryota; Metazoa; C…	PF13854.3^Kelch_5^Kelch motif^7-33^E:5.3e-06`PF01344.22^Kelch_1^Kelch motif^10-54^E:3.3e-12`PF13964.3^Kelch_6^Kelch motif^10-55^E:2.5e-08`PF13418.3^Kelch_4^Galactose oxidase, central domain^10-54^E:8e-05`PF01344.22^Kelch_1^Kelch motif^105-138^E:7.8e-09`PF13964.3^Kelch_6^Kelch motif^105-141^E:3.6e-08
4	myoblasts	CapteG223185	2.72e-05	0.357704	0.406	0.231	0.446922
4	myoblasts	CapteG96907	0.028459	0.280786	0.311	0.231	1
4	myoblasts	CapteG121330	9.15e-05	0.364663	0.396	0.232	1
4	myoblasts	CapteG213191	0.000579519	0.351186	0.368	0.232	1
4	myoblasts	CapteG226766	0.0455854	0.252018	0.321	0.234	1
4	myoblasts	CapteG49339	0.00133183	0.414937	0.377	0.235	1	ZFR_DANRE^ZFR_DANRE^Q:1-525,H:888-1056^72.57%ID^E:3e-78^RecName: Full=Zinc finger RNA-binding protein;^Eukaryota; Metazoa; Chordata; Craniata; Vertebrata; Euteleostomi; Actinopterygii; Neopterygii; Teleostei; Ostariophysi; Cypriniformes; Cyprinidae; Danio	PF07528.11^DZF^DZF domain^1-148^E:3e-57
4	myoblasts	CapteG189448	0.227822	0.275161	0.274	0.235	1
4	myoblasts	tRNA-Cys.7	6.19e-05	0.290882	0.415	0.236	1
4	myoblasts	CapteG21078	8.3e-11	0.670484	0.491	0.238	1.36e-06	AQP_HAEIX^AQP_HAEIX^Q:101-766,H:14-234^32.44%ID^E:2e-27^RecName: Full=Aquaporin;^Eukaryota; Metazoa; Ecdysozoa; Arthropoda; Hexapoda; Insecta; Pterygota; Neoptera; Endopterygota; Diptera; Brachycera; Muscomorpha; Muscoidea; Muscidae; Haematobia	PF00230.17^MIP^Major intrinsic protein^14-228^E:1.6e-46
4	myoblasts	CapteG40088	1.09e-08	0.577409	0.472	0.241	0.000178885	NMBR_HUMAN^NMBR_HUMAN^Q:1-555,H:61-248^46.03%ID^E:1e-41^RecName: Full=Neuromedin-B receptor;^Eukaryota; Metazoa; Chordata; Craniata; Vertebrata; Euteleostomi; Mammalia; Eutheria; Euarchontoglires; Primates; Haplorrhini; Catarrhini; Hominidae; Homo	PF00001.18^7tm_1^7 transmembrane receptor (rhodopsin family)^1-176^E:3.4e-33
4	myoblasts	CapteG185157	2.47e-08	0.565329	0.472	0.242	0.000406114	VM1BI_BOTMO^VM1BI_BOTMO^Q:664-1359,H:10-193^26.81%ID^E:1e-10^RecName: Full=Snake venom metalloproteinase BmooMPalpha-I;^Eukaryota; Metazoa; Chordata; Craniata; Vertebrata; Euteleostomi; Lepidosauria; Squamata; Bifurcata; Unidentata; Episquamata; Toxicofera; Serpentes; Colubroidea; Viperidae; Crotalinae; Bothrops	PF13688.3^Reprolysin_5^Metallo-peptidase family M12^221-427^E:5.3e-11`PF13582.3^Reprolysin_3^Metallo-peptidase family M12B Reprolysin-like^260-407^E:2e-07`PF01421.16^Reprolysin^Reprolysin (M12B) family zinc metalloprotease^315-453^E:4.9e-10`PF13583.3^Reprolysin_4^Metallo-peptidase family M12B Reprolysin-like^362-426^E:8.7e-07`PF13574.3^Reprolysin_2^Metallo-peptidase family M12B Reprolysin-like^38…
4	myoblasts	CapteG31100	9.61e-05	0.395618	0.406	0.243	1	.	PF09588.7^YqaJ^YqaJ-like viral recombinase domain^4-106^E:8.3e-13
4	myoblasts	CapteG223733	5.52e-12	0.654466	0.519	0.245	9.07e-08	CBPA1_DROPS^CBPA1_DROPS^Q:43-1281,H:22-419^31.67%ID^E:3e-63^RecName: Full=Zinc carboxypeptidase A 1;^Eukaryota; Metazoa; Ecdysozoa; Arthropoda; Hexapoda; Insecta; Pterygota; Neoptera; Endopterygota; Diptera; Brachycera; Muscomorpha; Ephydroidea; Drosophilidae; Drosophila; Sophophora	PF02244.13^Propep_M14^Carboxypeptidase activation peptide^26-95^E:1.1e-12`PF00246.21^Peptidase_M14^Zinc carboxypeptidase^146-416^E:1.3e-70
4	myoblasts	CapteG150346	0.0316067	0.25819	0.33	0.246	1
4	myoblasts	CapteG218723	6.73e-06	0.471452	0.443	0.247	0.110517	.	PF01549.21^ShK^ShK domain-like^346-378^E:0.0045
4	myoblasts	CapteG66010	1.39e-06	0.426478	0.453	0.247	0.0228765	RASEF_CAEEL^RASEF_CAEEL^Q:1-183,H:6-64^39.34%ID^E:6e-08^RecName: Full=Ras and EF-hand domain-containing protein homolog;^Eukaryota; Metazoa; Ecdysozoa; Nematoda; Chromadorea; Rhabditida; Rhabditoidea; Rhabditidae; Peloderinae; Caenorhabditis	PF13499.3^EF-hand_7^EF-hand domain pair^1-59^E:3.6e-07`PF13833.3^EF-hand_8^EF-hand domain pair^13-61^E:6.8e-06
4	myoblasts	CapteG166694	2.78e-22	0.833141	0.651	0.249	4.57e-18	PREB_HUMAN^PREB_HUMAN^Q:20-1165,H:4-392^35.26%ID^E:2e-61^RecName: Full=Prolactin regulatory element-binding protein;^Eukaryota; Metazoa; Chordata; Craniata; Vertebrata; Euteleostomi; Mammalia; Eutheria; Euarchontoglires; Primates; Haplorrhini; Catarrhini; Hominidae; Homo	PF00400.29^WD40^WD domain, G-beta repeat^179-215^E:0.007
4	myoblasts	CapteG201130	4.36e-13	0.679236	0.547	0.252	7.17e-09	.	.
4	myoblasts	CapteG218321	1.24e-09	0.618604	0.491	0.253	2.04e-05	CHST1_DANRE^CHST1_DANRE^Q:226-1344,H:69-393^26.08%ID^E:3e-18^RecName: Full=Carbohydrate sulfotransferase 1;^Eukaryota; Metazoa; Chordata; Craniata; Vertebrata; Euteleostomi; Actinopterygii; Neopterygii; Teleostei; Ostariophysi; Cypriniformes; Cyprinidae; Danio	PF00685.24^Sulfotransfer_1^Sulfotransferase domain^76-442^E:2.2e-12`PF13469.3^Sulfotransfer_3^Sulfotransferase family^197-387^E:3.5e-11
4	myoblasts	CapteG174451	9.16e-07	0.416521	0.462	0.253	0.0150559	SCMC2_XENLA^SCMC2_XENLA^Q:132-1496,H:56-512^57.21%ID^E:0^RecName: Full=Calcium-binding mitochondrial carrier protein SCaMC-2;^Eukaryota; Metazoa; Chordata; Craniata; Vertebrata; Euteleostomi; Amphibia; Batrachia; Anura; Pipoidea; Pipidae; Xenopodinae; Xenopus; Xenopus	PF13499.3^EF-hand_7^EF-hand domain pair^15-77^E:1.3e-09`PF13202.3^EF-hand_5^EF hand^18-39^E:9.9e-05`PF13833.3^EF-hand_8^EF-hand domain pair^50-78^E:0.024`PF13202.3^EF-hand_5^EF hand^87-103^E:0.0045`PF00153.24^Mito_carr^Mitochondrial carrier protein^187-274^E:2.7e-24`PF00153.24^Mito_carr^Mitochondrial carrier protein^280-369^E:1.5e-24`PF00153.24^Mito_carr^Mitochondrial carrier protein^377-463^E:8.…
4	myoblasts	CapteG142325	0.00336711	0.282634	0.377	0.253	1
4	myoblasts	tRNA-Pro.17	3.94e-14	0.645941	0.575	0.254	6.47e-10
4	myoblasts	CapteG92786	2.17e-06	0.533878	0.443	0.254	0.0356253	RASD1_HUMAN^RASD1_HUMAN^Q:64-660,H:20-226^38.65%ID^E:3e-33^RecName: Full=Dexamethasone-induced Ras-related protein 1;^Eukaryota; Metazoa; Chordata; Craniata; Vertebrata; Euteleostomi; Mammalia; Eutheria; Euarchontoglires; Primates; Haplorrhini; Catarrhini; Hominidae; Homo	PF00025.18^Arf^ADP-ribosylation factor family^25-164^E:2.1e-05`PF00071.19^Ras^Ras family^28-192^E:3.7e-34`PF08477.10^Roc^Ras of Complex, Roc, domain of DAPkinase^28-147^E:2.5e-12
4	myoblasts	CapteG188071	4.39e-05	0.434413	0.425	0.254	0.720985	.	PF15112.3^DUF4559^Domain of unknown function (DUF4559)^2-144^E:9.9e-13
4	myoblasts	CapteG130729	4.45e-05	0.396078	0.425	0.254	0.730441	KMT2A_HUMAN^KMT2A_HUMAN^Q:1-1875,H:1419-2090^42.58%ID^E:5e-168^RecName: Full=Histone-lysine N-methyltransferase 2A;^Eukaryota; Metazoa; Chordata; Craniata; Vertebrata; Euteleostomi; Mammalia; Eutheria; Euarchontoglires; Primates; Haplorrhini; Catarrhini; Hominidae; Homo	PF00628.26^PHD^PHD-finger^148-206^E:1.1e-08`PF13832.3^zf-HC5HC2H_2^PHD-zinc-finger like domain^416-499^E:3.5e-08`PF13771.3^zf-HC5HC2H^PHD-like zinc-binding domain^429-506^E:4.7e-11`PF05964.11^FYRN^F/Y-rich N-terminus^555-602^E:3.9e-13
4	myoblasts	CapteG217532	0.00286522	0.412739	0.358	0.255	1	PTPRA_HUMAN^PTPRA_HUMAN^Q:423-656,H:221-301^41.98%ID^E:3e-09^RecName: Full=Receptor-type tyrosine-protein phosphatase alpha;^Eukaryota; Metazoa; Chordata; Craniata; Vertebrata; Euteleostomi; Mammalia; Eutheria; Euarchontoglires; Primates; Haplorrhini; Catarrhini; Hominidae; Homo	PF00102.24^Y_phosphatase^Protein-tyrosine phosphatase^183-230^E:4.2e-08
4	myoblasts	CapteG192674	0.000121586	0.32951	0.425	0.255	1
4	myoblasts	CapteG188288	1.69e-09	0.715811	0.5	0.256	2.77e-05	.	.
4	myoblasts	CapteG181288	0.000673402	0.340943	0.415	0.258	1
4	myoblasts	CapteG219277	0.233022	-0.362668	0.34	0.26	1
4	myoblasts	CapteG77910	3.81e-15	0.760846	0.575	0.261	6.25e-11	LEC1_MICCO^LEC1_MICCO^Q:1-339,H:19-130^36.28%ID^E:5e-17^RecName: Full=C-type lectin;^Eukaryota; Metazoa; Chordata; Craniata; Vertebrata; Euteleostomi; Lepidosauria; Squamata; Bifurcata; Unidentata; Episquamata; Toxicofera; Serpentes; Colubroidea; Elapidae; Elapinae; Micrurus	PF00059.18^Lectin_C^Lectin C-type domain^27-115^E:3.2e-16
4	myoblasts	CapteG77651	0.000156965	0.30955	0.425	0.261	1
4	myoblasts	CapteG80047	6.12e-06	0.537155	0.443	0.262	0.100628	FUCL_ANGAN^FUCL_ANGAN^Q:1-162,H:36-88^50%ID^E:2e-11^RecName: Full=Fucolectin;^Eukaryota; Metazoa; Chordata; Craniata; Vertebrata; Euteleostomi; Actinopterygii; Neopterygii; Teleostei; Anguilliformes; Anguillidae; Anguilla	.
4	myoblasts	CapteG216827	0.0188879	0.326096	0.358	0.263	1
4	myoblasts	CapteG78212	1.73e-08	0.583221	0.5	0.267	0.000283913	GT2D2_BOVIN^GT2D2_BOVIN^Q:1-369,H:827-946^43.09%ID^E:4e-25^RecName: Full=General transcription factor II-I repeat domain-containing protein 2;^Eukaryota; Metazoa; Chordata; Craniata; Vertebrata; Euteleostomi; Mammalia; Eutheria; Laurasiatheria; Cetartiodactyla; Ruminantia; Pecora; Bovidae; Bovinae; Bos	.
4	myoblasts	CapteG196808	0.00186336	0.327224	0.396	0.267	1
4	myoblasts	CapteG208195	0.0266627	0.257008	0.368	0.273	1
4	myoblasts	CapteG219280	3.98e-07	0.544906	0.472	0.275	0.00654245
4	myoblasts	CapteG123667	0.000734613	0.307413	0.425	0.275	1
4	myoblasts	CapteG193121	2.57e-13	0.696644	0.575	0.276	4.22e-09	.	.
4	myoblasts	CapteG188040	0.00183693	0.28509	0.406	0.276	1
4	myoblasts	CapteG203772	1.92e-08	0.565046	0.509	0.28	0.000315184	.	PF00094.22^VWD^von Willebrand factor type D domain^71-163^E:0.00022
4	myoblasts	CapteG219957	1.14e-06	1.03592	0.453	0.283	0.0188074	PDE3B_HUMAN^PDE3B_HUMAN^Q:1249-2547,H:672-1109^53.81%ID^E:2e-148^RecName: Full=cGMP-inhibited 3',5'-cyclic phosphodiesterase B;^Eukaryota; Metazoa; Chordata; Craniata; Vertebrata; Euteleostomi; Mammalia; Eutheria; Euarchontoglires; Primates; Haplorrhini; Catarrhini; Hominidae; Homo	PF00233.16^PDEase_I^3'5'-cyclic nucleotide phosphodiesterase^547-746^E:9.3e-60
4	myoblasts	tRNA-Ser.87	0.0724587	-0.253786	0.208	0.285	1
4	myoblasts	CapteG123256	4.96e-05	0.324426	0.462	0.286	0.814688
4	myoblasts	CapteG198391	0.0247396	0.266449	0.368	0.288	1
4	myoblasts	CapteG177891	3.1e-10	0.567184	0.557	0.289	5.1e-06	SNAG_BOVIN^SNAG_BOVIN^Q:13-837,H:2-276^45.82%ID^E:1e-79^RecName: Full=Gamma-soluble NSF attachment protein;^Eukaryota; Metazoa; Chordata; Craniata; Vertebrata; Euteleostomi; Mammalia; Eutheria; Laurasiatheria; Cetartiodactyla; Ruminantia; Pecora; Bovidae; Bovinae; Bos	PF14938.3^SNAP^Soluble NSF attachment protein, SNAP^13-253^E:1.9e-24
4	myoblasts	CapteG213170	4.71e-06	0.499986	0.462	0.289	0.0774027	RBBP6_MOUSE^RBBP6_MOUSE^Q:4-459,H:56-224^34.3%ID^E:2e-22^RecName: Full=E3 ubiquitin-protein ligase RBBP6;^Eukaryota; Metazoa; Chordata; Craniata; Vertebrata; Euteleostomi; Mammalia; Eutheria; Euarchontoglires; Glires; Rodentia; Sciurognathi; Muroidea; Muridae; Murinae; Mus; Mus	.
4	myoblasts	CapteG211263	2.19e-06	0.408897	0.5	0.29	0.0359528	.	.
4	myoblasts	tRNA-Glu.24	0.00068246	0.384504	0.415	0.291	1
4	myoblasts	CapteG223779	0.472381	-0.308816	0.302	0.295	1
4	myoblasts	CapteG188877	0.0300126	0.27843	0.387	0.296	1
4	myoblasts	CapteG156740	0.00132336	0.277067	0.443	0.298	1
4	myoblasts	CapteG227122	0.00167033	0.416771	0.425	0.299	1	.	PF02140.15^Gal_Lectin^Galactose binding lectin domain^47-126^E:3.8e-05
4	myoblasts	CapteG59837	3.18e-05	0.367199	0.491	0.301	0.52305
4	myoblasts	CapteG85711	1.07e-07	0.561198	0.509	0.305	0.00175292	PPR27_MOUSE^PPR27_MOUSE^Q:1-339,H:26-136^38.05%ID^E:4e-19^RecName: Full=Protein phosphatase 1 regulatory subunit 27;^Eukaryota; Metazoa; Chordata; Craniata; Vertebrata; Euteleostomi; Mammalia; Eutheria; Euarchontoglires; Glires; Rodentia; Sciurognathi; Muroidea; Muridae; Murinae; Mus; Mus	PF13637.3^Ank_4^Ankyrin repeats (many copies)^10-61^E:2.8e-06`PF12796.4^Ank_2^Ankyrin repeats (3 copies)^15-100^E:4e-12`PF13637.3^Ank_4^Ankyrin repeats (many copies)^41-94^E:1.6e-09`PF00023.27^Ank^Ankyrin repeat^41-71^E:0.00031`PF13606.3^Ank_3^Ankyrin repeat^41-68^E:0.00011`PF13857.3^Ank_5^Ankyrin repeats (many copies)^64-114^E:1.4e-07`PF00023.27^Ank^Ankyrin repeat^73-104^E:3.4e-05
4	myoblasts	CapteG188158	0.0184973	0.309038	0.406	0.31	1
4	myoblasts	CapteG205520	0.010076	0.331266	0.415	0.314	1
4	myoblasts	CapteG194022	7.79e-05	0.388492	0.481	0.317	1	ABR_BOVIN^ABR_BOVIN^Q:178-1989,H:79-699^36.35%ID^E:5e-121^RecName: Full=Active breakpoint cluster region-related protein;^Eukaryota; Metazoa; Chordata; Craniata; Vertebrata; Euteleostomi; Mammalia; Eutheria; Laurasiatheria; Cetartiodactyla; Ruminantia; Pecora; Bovidae; Bovinae; Bos	PF00621.17^RhoGEF^RhoGEF domain^76-256^E:1.3e-27`PF00168.27^C2^C2 domain^481-566^E:3.8e-06`PF00620.24^RhoGAP^RhoGAP domain^625-664^E:6.8e-07
4	myoblasts	CapteG195064	1.33e-11	0.616051	0.594	0.318	2.18e-07	.	.
4	myoblasts	CapteG149044	0.00136006	0.388794	0.443	0.32	1	DJC12_HUMAN^DJC12_HUMAN^Q:1-444,H:1-198^36.87%ID^E:4e-28^RecName: Full=DnaJ homolog subfamily C member 12;^Eukaryota; Metazoa; Chordata; Craniata; Vertebrata; Euteleostomi; Mammalia; Eutheria; Euarchontoglires; Primates; Haplorrhini; Catarrhini; Hominidae; Homo	PF00226.28^DnaJ^DnaJ domain^13-74^E:1.4e-18
4	myoblasts	CapteG62994	4.75e-05	0.380224	0.5	0.32	0.779926
4	myoblasts	CapteG201544	0.00105033	0.327067	0.462	0.323	1
4	myoblasts	CapteG199845	5.63e-26	1.08774	0.726	0.324	9.25e-22	.	.
4	myoblasts	CapteG226394	1.41e-21	0.979998	0.708	0.327	2.31e-17	DOLK_MOUSE^DOLK_MOUSE^Q:673-1587,H:179-491^29.01%ID^E:2e-15^RecName: Full=Dolichol kinase {ECO:0000312|MGI:MGI:2677836};^Eukaryota; Metazoa; Chordata; Craniata; Vertebrata; Euteleostomi; Mammalia; Eutheria; Euarchontoglires; Glires; Rodentia; Sciurognathi; Muroidea; Muridae; Murinae; Mus; Mus	.
4	myoblasts	CapteG223054	7.43e-21	0.953748	0.717	0.328	1.22e-16	GABPA_HUMAN^GABPA_HUMAN^Q:1278-1619,H:315-428^78.95%ID^E:6e-55^RecName: Full=GA-binding protein alpha chain;^Eukaryota; Metazoa; Chordata; Craniata; Vertebrata; Euteleostomi; Mammalia; Eutheria; Euarchontoglires; Primates; Haplorrhini; Catarrhini; Hominidae; Homo`GABPA_HUMAN^GABPA_HUMAN^Q:582-1295,H:38-259^39.58%ID^E:1e-42^RecName: Full=GA-binding protein alpha chain;^Eukaryota; Metazoa; Chordata…	PF11620.5^GABP-alpha^GA-binding protein alpha chain^160-243^E:9.1e-35`PF02198.13^SAM_PNT^Sterile alpha motif (SAM)/Pointed domain^307-389^E:1.4e-25`PF00178.19^Ets^Ets-domain^399-478^E:3.5e-34
4	myoblasts	CapteG134305	0.0321425	0.273416	0.425	0.329	1
4	myoblasts	CapteG208975	8.44e-12	0.769643	0.604	0.333	1.39e-07	.	.
4	myoblasts	CapteG140369	4.12e-11	0.678724	0.604	0.334	6.77e-07	ING5_HUMAN^ING5_HUMAN^Q:1-150,H:1-50^58%ID^E:6e-14^RecName: Full=Inhibitor of growth protein 5;^Eukaryota; Metazoa; Chordata; Craniata; Vertebrata; Euteleostomi; Mammalia; Eutheria; Euarchontoglires; Primates; Haplorrhini; Catarrhini; Hominidae; Homo	PF12998.4^ING^Inhibitor of growth proteins N-terminal histone-binding^6-50^E:5.1e-10
4	myoblasts	CapteG148335	0.00207576	0.329929	0.472	0.339	1
4	myoblasts	CapteG93883	1.46e-06	0.476667	0.538	0.341	0.0239595	OPN4_BRABE^OPN4_BRABE^Q:31-909,H:80-381^26.69%ID^E:3e-18^RecName: Full=Melanopsin;^Eukaryota; Metazoa; Chordata; Cephalochordata; Branchiostomidae; Branchiostoma	PF10328.6^7TM_GPCR_Srx^Serpentine type 7TM GPCR chemoreceptor Srx^24-214^E:2.7e-06`PF10320.6^7TM_GPCR_Srsx^Serpentine type 7TM GPCR chemoreceptor Srsx^27-305^E:1.2e-12`PF00001.18^7tm_1^7 transmembrane receptor (rhodopsin family)^32-290^E:2.7e-35
4	myoblasts	CapteG192197	1.2e-05	0.426384	0.528	0.346	0.197515	.	.
4	myoblasts	CapteG205304	2.68e-07	0.501196	0.566	0.351	0.00440451	.	.
4	myoblasts	CapteG107552	6.59e-08	0.587527	0.575	0.352	0.00108206	YM54_YEAST^YM54_YEAST^Q:4-2520,H:28-942^35.41%ID^E:7e-167^RecName: Full=Uncharacterized protein YMR196W;^Eukaryota; Fungi; Dikarya; Ascomycota; Saccharomycotina; Saccharomycetes; Saccharomycetales; Saccharomycetaceae; Saccharomyces	PF03200.13^Glyco_hydro_63^Glycosyl hydrolase family 63 C-terminal domain^556-839^E:2.5e-14
4	myoblasts	CapteG202837	2e-05	0.384697	0.538	0.356	0.329398	.	.
4	myoblasts	CapteG149774	0.00330352	0.336558	0.472	0.357	1
4	myoblasts	CapteG27471	0.0307942	0.272215	0.434	0.357	1
4	myoblasts	CapteG18429	6.78e-05	0.414806	0.528	0.36	1	GNTK_XENTR^GNTK_XENTR^Q:1-489,H:1-173^45.09%ID^E:3e-46^RecName: Full=Probable gluconokinase;^Eukaryota; Metazoa; Chordata; Craniata; Vertebrata; Euteleostomi; Amphibia; Batrachia; Anura; Pipoidea; Pipidae; Xenopodinae; Xenopus; Silurana	PF01202.19^SKI^Shikimate kinase^10-123^E:6.7e-14
4	myoblasts	CapteG86125	6.75e-10	0.605481	0.613	0.361	1.11e-05	RTBS_DROME^RTBS_DROME^Q:10-396,H:709-835^23.66%ID^E:3e-06^RecName: Full=Probable RNA-directed DNA polymerase from transposon BS;^Eukaryota; Metazoa; Ecdysozoa; Arthropoda; Hexapoda; Insecta; Pterygota; Neoptera; Endopterygota; Diptera; Brachycera; Muscomorpha; Ephydroidea; Drosophilidae; Drosophila; Sophophora	PF09004.7^DUF1891^Domain of unknown function (DUF1891)^59-100^E:4.5e-05
4	myoblasts	CapteG212678	0.0303026	0.277156	0.453	0.365	1
4	myoblasts	CapteG205337	3.05e-14	0.675755	0.689	0.368	5.01e-10	.	.
4	myoblasts	CapteG205954	9.23e-08	0.55179	0.594	0.369	0.00151695	.	PF05729.9^NACHT^NACHT domain^3-124^E:2.9e-13
4	myoblasts	CapteG198395	1.58e-05	0.382551	0.566	0.375	0.260017	.	.
4	myoblasts	CapteG213294	8.99e-07	0.471759	0.585	0.376	0.0147646	.	.
4	myoblasts	CapteG199822	6.68e-05	0.435494	0.538	0.377	1	BAT1_HUMAN^BAT1_HUMAN^Q:25-834,H:202-484^34.63%ID^E:1e-42^RecName: Full=b(0,+)-type amino acid transporter 1;^Eukaryota; Metazoa; Chordata; Craniata; Vertebrata; Euteleostomi; Mammalia; Eutheria; Euarchontoglires; Primates; Haplorrhini; Catarrhini; Hominidae; Homo	PF13520.3^AA_permease_2^Amino acid permease^14-249^E:1e-17
4	myoblasts	CapteG163156	0.00174523	0.339728	0.509	0.38	1
4	myoblasts	CapteG48374	0.258153	0.309183	0.425	0.389	1
4	myoblasts	CapteG183511	1.46e-06	0.619293	0.575	0.391	0.0239438	TIM44_RAT^TIM44_RAT^Q:1-1203,H:52-453^52.24%ID^E:1e-149^RecName: Full=Mitochondrial import inner membrane translocase subunit TIM44;^Eukaryota; Metazoa; Chordata; Craniata; Vertebrata; Euteleostomi; Mammalia; Eutheria; Euarchontoglires; Glires; Rodentia; Sciurognathi; Muroidea; Muridae; Murinae; Rattus	PF04280.12^Tim44^Tim44-like domain^245-391^E:8.6e-38
4	myoblasts	CapteG185130	1.78e-05	0.467907	0.557	0.397	0.292667	.	.
4	myoblasts	CapteG189399	2.16e-05	0.307967	0.594	0.401	0.355517
4	myoblasts	CapteG128198	0.010587	0.298932	0.5	0.407	1
4	myoblasts	CapteG170070	0.0133992	0.380512	0.509	0.408	1	TRI37_MOUSE^TRI37_MOUSE^Q:1-1425,H:5-462^72%ID^E:0^RecName: Full=E3 ubiquitin-protein ligase TRIM37 {ECO:0000305};^Eukaryota; Metazoa; Chordata; Craniata; Vertebrata; Euteleostomi; Mammalia; Eutheria; Euarchontoglires; Glires; Rodentia; Sciurognathi; Muroidea; Muridae; Murinae; Mus; Mus	PF00643.21^zf-B_box^B-box zinc finger^77-116^E:4.2e-05`PF00917.23^MATH^MATH domain^269-382^E:1.3e-06
4	myoblasts	CapteG187670	0.000128929	0.341094	0.557	0.408	1
4	myoblasts	CapteG224102	4.57e-07	0.472693	0.632	0.409	0.00751153	SNPC3_BOVIN^SNPC3_BOVIN^Q:13-1098,H:45-405^33.24%ID^E:3e-64^RecName: Full=snRNA-activating protein complex subunit 3;^Eukaryota; Metazoa; Chordata; Craniata; Vertebrata; Euteleostomi; Mammalia; Eutheria; Laurasiatheria; Cetartiodactyla; Ruminantia; Pecora; Bovidae; Bovinae; Bos	PF12251.5^zf-SNAP50_C^snRNA-activating protein of 50kDa MW C terminal^163-366^E:3.6e-68
4	myoblasts	CapteG215982	7.44e-06	0.408634	0.613	0.409	0.122165	.	.
4	myoblasts	CapteG101209	1.17e-09	0.554022	0.651	0.416	1.92e-05	S35D3_MOUSE^S35D3_MOUSE^Q:22-948,H:11-319^32.59%ID^E:1e-34^RecName: Full=Solute carrier family 35 member D3;^Eukaryota; Metazoa; Chordata; Craniata; Vertebrata; Euteleostomi; Mammalia; Eutheria; Euarchontoglires; Glires; Rodentia; Sciurognathi; Muroidea; Muridae; Murinae; Mus; Mus	PF03151.13^TPT^Triose-phosphate Transporter family^9-294^E:8.3e-13
4	myoblasts	CapteG199844	1.16e-06	0.485207	0.623	0.424	0.0190849	.	.
4	myoblasts	CapteG217608	4.65e-07	0.434327	0.651	0.437	0.00763211	.	PF15299.3^ALS2CR8^Amyotrophic lateral sclerosis 2 chromosomal region candidate gene 8^241-422^E:2e-14
4	myoblasts	CapteG114717	0.00910086	0.311915	0.566	0.446	1
4	myoblasts	CapteG216683	4.47e-13	0.669119	0.755	0.457	7.34e-09	.	.
4	myoblasts	CapteG185748	0.000109601	0.392312	0.632	0.47	1	P52K_MOUSE^P52K_MOUSE^Q:94-420,H:577-685^32.76%ID^E:2e-08^RecName: Full=52 kDa repressor of the inhibitor of the protein kinase;^Eukaryota; Metazoa; Chordata; Craniata; Vertebrata; Euteleostomi; Mammalia; Eutheria; Euarchontoglires; Glires; Rodentia; Sciurognathi; Muroidea; Muridae; Murinae; Mus; Mus	.
4	myoblasts	CapteG154687	0.000209588	0.262851	0.66	0.488	1
4	myoblasts	CapteG214331	0.000364491	0.325116	0.651	0.496	1
4	myoblasts	CapteG194765	0.00670855	0.328787	0.613	0.498	1
4	myoblasts	CapteG215687	2.24e-07	0.501766	0.708	0.517	0.00367242	CPT1A_RAT^CPT1A_RAT^Q:211-2154,H:107-766^33.04%ID^E:6e-100^RecName: Full=Carnitine O-palmitoyltransferase 1, liver isoform;^Eukaryota; Metazoa; Chordata; Craniata; Vertebrata; Euteleostomi; Mammalia; Eutheria; Euarchontoglires; Glires; Rodentia; Sciurognathi; Muroidea; Muridae; Murinae; Rattus	PF00755.17^Carn_acyltransf^Choline/Carnitine o-acyltransferase^133-714^E:2e-149
4	myoblasts	CapteG206755	0.000236199	0.34041	0.698	0.533	1
4	myoblasts	CapteG214276	0.00203337	0.303462	0.67	0.538	1
4	myoblasts	CapteG207754	0.00141947	0.334619	0.651	0.545	1
4	myoblasts	CapteG209129	2.55e-05	-0.605108	0.368	0.551	0.418917
4	myoblasts	CapteG209181	1.26e-05	-0.513253	0.368	0.569	0.20697
4	myoblasts	CapteG196199	2.8e-17	0.73855	0.896	0.585	4.6e-13	.	.
4	myoblasts	CapteG196253	9.58e-05	0.302468	0.84	0.691	1
4	myoblasts	CapteG200625	6.34e-08	0.367839	0.887	0.717	0.00104153	.	PF00656.19^Peptidase_C14^Caspase domain^71-148^E:1.7e-06
4	myoblasts	CapteG220753	1.31e-08	0.476986	0.896	0.734	0.000214714	FAT4_MOUSE^FAT4_MOUSE^Q:5467-16218,H:80-3644^26.4%ID^E:3e-168^RecName: Full=Protocadherin Fat 4;^Eukaryota; Metazoa; Chordata; Craniata; Vertebrata; Euteleostomi; Mammalia; Eutheria; Euarchontoglires; Glires; Rodentia; Sciurognathi; Muroidea; Muridae; Murinae; Mus; Mus`FAT4_MOUSE^FAT4_MOUSE^Q:1225-12096,H:35-3638^25.68%ID^E:3e-167^RecName: Full=Protocadherin Fat 4;^Eukaryota; Metazoa; Chordata; C…	PF00028.14^Cadherin^Cadherin domain^154-257^E:3.3e-10`PF00028.14^Cadherin^Cadherin domain^298-383^E:5.2e-07`PF00028.14^Cadherin^Cadherin domain^514-609^E:9.8e-12`PF00028.14^Cadherin^Cadherin domain^623-710^E:6.9e-12`PF00028.14^Cadherin^Cadherin domain^725-811^E:2.5e-16`PF00028.14^Cadherin^Cadherin domain^826-913^E:3.3e-15`PF00028.14^Cadherin^Cadherin domain^934-1024^E:1.7e-12`PF00028.14^Cadherin^…
4	myoblasts	CapteG149232	2.58e-05	0.350733	0.925	0.734	0.423482
4	myoblasts	CapteG110813	8.17e-19	0.614477	0.981	0.764	1.34e-14	RAB30_MOUSE^RAB30_MOUSE^Q:1-546,H:3-184^71.98%ID^E:2e-94^RecName: Full=Ras-related protein Rab-30;^Eukaryota; Metazoa; Chordata; Craniata; Vertebrata; Euteleostomi; Mammalia; Eutheria; Euarchontoglires; Glires; Rodentia; Sciurognathi; Muroidea; Muridae; Murinae; Mus; Mus	PF00025.18^Arf^ADP-ribosylation factor family^8-161^E:9.9e-13`PF00071.19^Ras^Ras family^9-168^E:3.7e-55`PF08477.10^Roc^Ras of Complex, Roc, domain of DAPkinase^9-123^E:1.5e-34`PF04670.9^Gtr1_RagA^Gtr1/RagA G protein conserved region^9-125^E:1.6e-05`PF01926.20^MMR_HSR1^50S ribosome-binding GTPase^9-95^E:5.9e-05
4	myoblasts	CapteG145963	9.67e-06	0.311767	0.896	0.766	0.158883
4	myoblasts	CapteG205047	8.76e-08	0.345102	0.972	0.834	0.00143993	DCSG_STRLA^DCSG_STRLA^Q:289-1071,H:31-298^30.22%ID^E:3e-23^RecName: Full=Cycloserine biosynthesis protein DcsG;^Bacteria; Actinobacteria; Streptomycetales; Streptomycetaceae; Streptomyces	.
4	myoblasts	CapteG191881	1.47e-06	0.300508	0.981	0.838	0.0241216
4	myoblasts	CapteG193014	7.02e-08	0.309658	0.981	0.851	0.00115397	FAT_DROME^FAT_DROME^Q:79-384,H:4002-4090^35.51%ID^E:5e-12^RecName: Full=Cadherin-related tumor suppressor;^Eukaryota; Metazoa; Ecdysozoa; Arthropoda; Hexapoda; Insecta; Pterygota; Neoptera; Endopterygota; Diptera; Brachycera; Muscomorpha; Ephydroidea; Drosophilidae; Drosophila; Sophophora	PF00008.24^EGF^EGF-like domain^96-125^E:1.5e-08`PF12661.4^hEGF^Human growth factor-like EGF^115-127^E:0.0048
4	myoblasts	CapteG105530	4.66e-08	0.306366	0.972	0.851	0.00076532	TENX_HUMAN^TENX_HUMAN^Q:1-240,H:4158-4235^45%ID^E:6e-18^RecName: Full=Tenascin-X;^Eukaryota; Metazoa; Chordata; Craniata; Vertebrata; Euteleostomi; Mammalia; Eutheria; Euarchontoglires; Primates; Haplorrhini; Catarrhini; Hominidae; Homo	PF00147.15^Fibrinogen_C^Fibrinogen beta and gamma chains, C-terminal globular domain^1-77^E:1.9e-20
4	myoblasts	CapteG228821	3.49e-12	0.393984	0.981	0.867	5.73e-08	RM09_DROME^RM09_DROME^Q:112-573,H:19-168^32.47%ID^E:1e-19^RecName: Full=39S ribosomal protein L9, mitochondrial;^Eukaryota; Metazoa; Ecdysozoa; Arthropoda; Hexapoda; Insecta; Pterygota; Neoptera; Endopterygota; Diptera; Brachycera; Muscomorpha; Ephydroidea; Drosophilidae; Drosophila; Sophophora	PF01281.16^Ribosomal_L9_N^Ribosomal protein L9, N-terminal domain^91-136^E:2.2e-14
5	protonephridia	CapteG209195	5.54e-167	1.18056	0.267	0.002	9.1e-163	.	.
5	protonephridia	CapteG228105	2.61e-77	2.47916	0.378	0.026	4.29e-73	.	.
5	protonephridia	CapteG25340	1.89e-28	1.78974	0.533	0.143	3.11e-24	B3GT2_PONAB^B3GT2_PONAB^Q:1-663,H:146-344^32.13%ID^E:1e-27^RecName: Full=Beta-1,3-galactosyltransferase 2;^Eukaryota; Metazoa; Chordata; Craniata; Vertebrata; Euteleostomi; Mammalia; Eutheria; Euarchontoglires; Primates; Haplorrhini; Catarrhini; Hominidae; Pongo	PF01762.18^Galactosyl_T^Galactosyltransferase^21-123^E:5.6e-19`PF01762.18^Galactosyl_T^Galactosyltransferase^154-234^E:9.5e-11
5	protonephridia	CapteG1231	8.06e-64	1.74204	0.344	0.026	1.32e-59	RM27_MOUSE^RM27_MOUSE^Q:48-431,H:17-148^35.61%ID^E:3e-14^RecName: Full=39S ribosomal protein L27, mitochondrial;^Eukaryota; Metazoa; Chordata; Craniata; Vertebrata; Euteleostomi; Mammalia; Eutheria; Euarchontoglires; Glires; Rodentia; Sciurognathi; Muroidea; Muridae; Murinae; Mus; Mus	PF01016.16^Ribosomal_L27^Ribosomal L27 protein^31-99^E:3.4e-20
5	protonephridia	CapteG195776	1.74e-26	1.57907	0.467	0.118	2.87e-22	.	.
5	protonephridia	CapteG146472	5.11e-112	1.55569	0.344	0.012	8.39e-108	KBTB8_DANRE^KBTB8_DANRE^Q:1-522,H:47-220^29.89%ID^E:1e-27^RecName: Full=Kelch repeat and BTB domain-containing protein 8;^Eukaryota; Metazoa; Chordata; Craniata; Vertebrata; Euteleostomi; Actinopterygii; Neopterygii; Teleostei; Ostariophysi; Cypriniformes; Cyprinidae; Danio	PF00651.28^BTB^BTB/POZ domain^2-97^E:1.6e-20`PF07707.12^BACK^BTB And C-terminal Kelch^105-174^E:1.2e-15
5	protonephridia	CapteG21698	9.26e-31	1.41874	0.311	0.047	1.52e-26	ESTD_RAT^ESTD_RAT^Q:62-898,H:3-280^67.38%ID^E:2e-144^RecName: Full=S-formylglutathione hydrolase;^Eukaryota; Metazoa; Chordata; Craniata; Vertebrata; Euteleostomi; Mammalia; Eutheria; Euarchontoglires; Glires; Rodentia; Sciurognathi; Muroidea; Muridae; Murinae; Rattus	PF00756.17^Esterase^Putative esterase^24-276^E:1e-64
5	protonephridia	CapteG225673	4.11e-91	1.40706	0.289	0.011	6.76e-87	EGT2_NEUCR^EGT2_NEUCR^Q:16-1170,H:26-449^30.44%ID^E:2e-45^RecName: Full=Hercynylcysteine sulfoxide lyase {ECO:0000305|PubMed:25275953};^Eukaryota; Fungi; Dikarya; Ascomycota; Pezizomycotina; Sordariomycetes; Sordariomycetidae; Sordariales; Sordariaceae; Neurospora	PF00266.16^Aminotran_5^Aminotransferase class-V^68-322^E:1.1e-31`PF00155.18^Aminotran_1_2^Aminotransferase class I and II^72-198^E:4.9e-07`PF01053.17^Cys_Met_Meta_PP^Cys/Met metabolism PLP-dependent enzyme^86-221^E:3.3e-05
5	protonephridia	CapteG218492	1.02e-19	1.3758	0.433	0.129	1.67e-15	.	.
5	protonephridia	CapteG221220	9.45e-94	1.35285	0.289	0.01	1.55e-89	GALM_BOVIN^GALM_BOVIN^Q:10-1035,H:2-342^51.01%ID^E:9e-114^RecName: Full=Aldose 1-epimerase;^Eukaryota; Metazoa; Chordata; Craniata; Vertebrata; Euteleostomi; Mammalia; Eutheria; Laurasiatheria; Cetartiodactyla; Ruminantia; Pecora; Bovidae; Bovinae; Bos	PF01263.17^Aldose_epim^Aldose 1-epimerase^21-341^E:4.4e-96
5	protonephridia	CapteG205217	8.98e-25	1.34162	0.589	0.197	1.48e-20	AGRB3_MOUSE^AGRB3_MOUSE^Q:595-822,H:429-507^36.71%ID^E:6e-07^RecName: Full=Adhesion G protein-coupled receptor B3;^Eukaryota; Metazoa; Chordata; Craniata; Vertebrata; Euteleostomi; Mammalia; Eutheria; Euarchontoglires; Glires; Rodentia; Sciurognathi; Muroidea; Muridae; Murinae; Mus; Mus	PF00024.23^PAN_1^PAN domain^141-188^E:5.5e-06`PF14295.3^PAN_4^PAN domain^142-179^E:0.00098`PF00090.16^TSP_1^Thrombospondin type 1 domain^227-274^E:9.2e-09
5	protonephridia	CapteG74266	5.18e-67	1.33036	0.311	0.02	8.52e-63	GPR54_ORENI^GPR54_ORENI^Q:1-906,H:44-345^42.76%ID^E:1e-61^RecName: Full=G-protein coupled receptor 54;^Eukaryota; Metazoa; Chordata; Craniata; Vertebrata; Euteleostomi; Actinopterygii; Neopterygii; Teleostei; Neoteleostei; Acanthomorphata; Ovalentaria; Cichlomorphae; Cichliformes; Cichlidae; African cichlids; Pseudocrenilabrinae; Oreochromini; Oreochromis	PF00001.18^7tm_1^7 transmembrane receptor (rhodopsin family)^19-282^E:8e-53
5	protonephridia	CapteG195064	2.11e-21	1.2733	0.722	0.316	3.47e-17	.	.
5	protonephridia	CapteG226803	5.53e-26	1.21612	0.411	0.09	9.08e-22	.	PF00235.16^Profilin^Profilin^74-202^E:9.2e-14
5	protonephridia	tRNA-Asn.8	7.66e-27	1.18791	0.267	0.038	1.26e-22
5	protonephridia	CapteG216949	9.74e-19	1.16297	0.522	0.191	1.6e-14	.	.
5	protonephridia	CapteG188263	4.87e-12	1.11909	0.344	0.117	8e-08	.	.
5	protonephridia	CapteG85711	2.85e-14	1.11194	0.622	0.303	4.68e-10	PPR27_MOUSE^PPR27_MOUSE^Q:1-339,H:26-136^38.05%ID^E:4e-19^RecName: Full=Protein phosphatase 1 regulatory subunit 27;^Eukaryota; Metazoa; Chordata; Craniata; Vertebrata; Euteleostomi; Mammalia; Eutheria; Euarchontoglires; Glires; Rodentia; Sciurognathi; Muroidea; Muridae; Murinae; Mus; Mus	PF13637.3^Ank_4^Ankyrin repeats (many copies)^10-61^E:2.8e-06`PF12796.4^Ank_2^Ankyrin repeats (3 copies)^15-100^E:4e-12`PF13637.3^Ank_4^Ankyrin repeats (many copies)^41-94^E:1.6e-09`PF00023.27^Ank^Ankyrin repeat^41-71^E:0.00031`PF13606.3^Ank_3^Ankyrin repeat^41-68^E:0.00011`PF13857.3^Ank_5^Ankyrin repeats (many copies)^64-114^E:1.4e-07`PF00023.27^Ank^Ankyrin repeat^73-104^E:3.4e-05
5	protonephridia	CapteG207721	5.57e-15	1.10329	0.333	0.096	9.15e-11	.	PF02140.15^Gal_Lectin^Galactose binding lectin domain^40-119^E:3.3e-11
5	protonephridia	CapteG194524	2.63e-24	1.10062	0.322	0.061	4.32e-20	.	.
5	protonephridia	CapteG85683	2.02e-27	1.08651	0.267	0.038	3.32e-23	NRF6_CAEEL^NRF6_CAEEL^Q:1-573,H:511-743^29.32%ID^E:9e-24^RecName: Full=Nose resistant to fluoxetine protein 6;^Eukaryota; Metazoa; Ecdysozoa; Nematoda; Chromadorea; Rhabditida; Rhabditoidea; Rhabditidae; Peloderinae; Caenorhabditis	.
5	protonephridia	tRNA-Leu.58	3.14e-108	1.08062	0.267	0.007	5.16e-104
5	protonephridia	CapteG223034	1.27e-09	1.07907	0.589	0.336	2.09e-05	ER6L2_MOUSE^ER6L2_MOUSE^Q:534-2129,H:114-704^47.3%ID^E:7e-175^RecName: Full=DNA excision repair protein ERCC-6-like 2;^Eukaryota; Metazoa; Chordata; Craniata; Vertebrata; Euteleostomi; Mammalia; Eutheria; Euarchontoglires; Glires; Rodentia; Sciurognathi; Muroidea; Muridae; Murinae; Mus; Mus`ER6L2_MOUSE^ER6L2_MOUSE^Q:2250-2699,H:1108-1266^31.06%ID^E:6e-12^RecName: Full=DNA excision repair protein …	PF00176.20^SNF2_N^SNF2 family N-terminal domain^160-349^E:1.5e-36`PF04851.12^ResIII^Type III restriction enzyme, res subunit^167-302^E:5.5e-07`PF00271.28^Helicase_C^Helicase conserved C-terminal domain^481-593^E:4.7e-17
5	protonephridia	CapteG201544	2.37e-09	1.06531	0.556	0.321	3.89e-05	.	.
5	protonephridia	CapteG198478	3.93e-11	1.03518	0.267	0.082	6.46e-07	.	PF13927.3^Ig_3^Immunoglobulin domain^30-104^E:1.6e-07`PF07679.13^I-set^Immunoglobulin I-set domain^40-109^E:1.6e-08`PF00041.18^fn3^Fibronectin type III domain^162-243^E:4.6e-06
5	protonephridia	CapteG189448	2.46e-07	0.991398	0.433	0.232	0.0040457	CNBD2_MOUSE^CNBD2_MOUSE^Q:661-1053,H:209-348^30.56%ID^E:4e-11^RecName: Full=Cyclic nucleotide-binding domain-containing protein 2;^Eukaryota; Metazoa; Chordata; Craniata; Vertebrata; Euteleostomi; Mammalia; Eutheria; Euarchontoglires; Glires; Rodentia; Sciurognathi; Muroidea; Muridae; Murinae; Mus; Mus	PF00027.26^cNMP_binding^Cyclic nucleotide-binding domain^242-323^E:5.4e-14
5	protonephridia	CapteG115648	1.21e-10	0.991223	0.989	0.826	1.99e-06	YBOXH_APLCA^YBOXH_APLCA^Q:4-288,H:26-120^81.05%ID^E:1e-49^RecName: Full=Y-box factor homolog;^Eukaryota; Metazoa; Lophotrochozoa; Mollusca; Gastropoda; Heterobranchia; Euthyneura; Euopisthobranchia; Aplysiomorpha; Aplysioidea; Aplysiidae; Aplysia	PF00313.19^CSD^'Cold-shock' DNA-binding domain^9-77^E:4.8e-26
5	protonephridia	CapteG223184	2.46e-10	0.99013	0.456	0.21	4.04e-06	CNOT4_HUMAN^CNOT4_HUMAN^Q:556-1110,H:60-244^80.54%ID^E:1e-79^RecName: Full=CCR4-NOT transcription complex subunit 4;^Eukaryota; Metazoa; Chordata; Craniata; Vertebrata; Euteleostomi; Mammalia; Eutheria; Euarchontoglires; Primates; Haplorrhini; Catarrhini; Hominidae; Homo`CNOT4_HUMAN^CNOT4_HUMAN^Q:13-162,H:9-58^94%ID^E:7e-27^RecName: Full=CCR4-NOT transcription complex subunit 4;^Eukaryota; Metazo…	PF14570.3^zf-RING_4^RING/Ubox like zinc-binding domain^10-54^E:5.6e-17`PF00076.19^RRM_1^RNA recognition motif. (a.k.a. RRM, RBD, or RNP domain)^248-313^E:9.5e-07
5	protonephridia	CapteG224814	2.89e-15	0.981248	0.5	0.193	4.75e-11	POC5_MACFA^POC5_MACFA^Q:91-1593,H:27-547^31.83%ID^E:7e-80^RecName: Full=Centrosomal protein POC5;^Eukaryota; Metazoa; Chordata; Craniata; Vertebrata; Euteleostomi; Mammalia; Eutheria; Euarchontoglires; Primates; Haplorrhini; Catarrhini; Cercopithecidae; Cercopithecinae; Macaca	.
5	protonephridia	CapteG63714	4.57e-49	0.960845	0.267	0.02	7.5e-45	DRD5L_TAKRU^DRD5L_TAKRU^Q:1-906,H:43-352^46.33%ID^E:8e-79^RecName: Full=D(5)-like dopamine receptor;^Eukaryota; Metazoa; Chordata; Craniata; Vertebrata; Euteleostomi; Actinopterygii; Neopterygii; Teleostei; Neoteleostei; Acanthomorphata; Eupercaria; Tetraodontiformes; Tetradontoidea; Tetraodontidae; Takifugu	PF13853.3^7tm_4^Olfactory receptor^5-190^E:5.1e-07`PF10328.6^7TM_GPCR_Srx^Serpentine type 7TM GPCR chemoreceptor Srx^6-196^E:3.1e-06`PF10320.6^7TM_GPCR_Srsx^Serpentine type 7TM GPCR chemoreceptor Srsx^9-297^E:4.7e-12`PF00001.18^7tm_1^7 transmembrane receptor (rhodopsin family)^14-283^E:4e-72
5	protonephridia	CapteG217608	1.06e-11	0.923381	0.7	0.437	1.73e-07	.	PF15299.3^ALS2CR8^Amyotrophic lateral sclerosis 2 chromosomal region candidate gene 8^241-422^E:2e-14
5	protonephridia	CapteG186188	1.17e-16	0.918333	0.556	0.217	1.92e-12	ANPRA_RAT^ANPRA_RAT^Q:154-1620,H:122-617^22.52%ID^E:6e-31^RecName: Full=Atrial natriuretic peptide receptor 1;^Eukaryota; Metazoa; Chordata; Craniata; Vertebrata; Euteleostomi; Mammalia; Eutheria; Euarchontoglires; Glires; Rodentia; Sciurognathi; Muroidea; Muridae; Murinae; Rattus	PF01094.25^ANF_receptor^Receptor family ligand binding region^17-340^E:2.3e-36`PF07714.14^Pkinase_Tyr^Protein tyrosine kinase^483-540^E:0.00018
5	protonephridia	CapteG124859	0.031493	0.858327	0.256	0.179	1	FUCT1_MOUSE^FUCT1_MOUSE^Q:4-981,H:38-361^42.51%ID^E:4e-78^RecName: Full=GDP-fucose transporter 1;^Eukaryota; Metazoa; Chordata; Craniata; Vertebrata; Euteleostomi; Mammalia; Eutheria; Euarchontoglires; Glires; Rodentia; Sciurognathi; Muroidea; Muridae; Murinae; Mus; Mus	PF03151.13^TPT^Triose-phosphate Transporter family^3-300^E:3.7e-17`PF00892.17^EamA^EamA-like transporter family^160-298^E:1e-07
5	protonephridia	CapteG19163	2.62e-05	0.854041	0.389	0.227	0.431045	KCD15_HUMAN^KCD15_HUMAN^Q:332-997,H:44-268^57.78%ID^E:2e-92^RecName: Full=BTB/POZ domain-containing protein KCTD15;^Eukaryota; Metazoa; Chordata; Craniata; Vertebrata; Euteleostomi; Mammalia; Eutheria; Euarchontoglires; Primates; Haplorrhini; Catarrhini; Hominidae; Homo	PF02214.19^BTB_2^BTB/POZ domain^29-116^E:8.2e-20
5	protonephridia	CapteG222534	3.94e-06	0.816075	0.256	0.11	0.0646756	AIM1_ARATH^AIM1_ARATH^Q:7-480,H:311-470^35.4%ID^E:3e-19^RecName: Full=Peroxisomal fatty acid beta-oxidation multifunctional protein AIM1;^Eukaryota; Viridiplantae; Streptophyta; Embryophyta; Tracheophyta; Spermatophyta; Magnoliophyta; eudicotyledons; Gunneridae; Pentapetalae; rosids; malvids; Brassicales; Brassicaceae; Camelineae; Arabidopsis	PF02737.15^3HCDH_N^3-hydroxyacyl-CoA dehydrogenase, NAD binding domain^3-173^E:3.5e-37`PF03446.12^NAD_binding_2^NAD binding domain of 6-phosphogluconate dehydrogenase^3-114^E:8.7e-08`PF01210.20^NAD_Gly3P_dh_N^NAD-dependent glycerol-3-phosphate dehydrogenase N-terminus^3-87^E:2.5e-05`PF13920.3^zf-C3HC4_3^Zinc finger, C3HC4 type (RING finger)^238-285^E:2.1e-14
5	protonephridia	CapteG185036	3.6e-15	0.809835	0.344	0.098	5.92e-11	.	.
5	protonephridia	CapteG199598	0.000136918	0.795464	0.433	0.288	1	.	.
5	protonephridia	CapteG191104	6.32e-07	0.755013	0.511	0.308	0.0103784	.	.
5	protonephridia	CapteG167222	1.87e-10	0.666253	0.311	0.107	3.07e-06	MFSD5_HUMAN^MFSD5_HUMAN^Q:19-1314,H:1-433^46.79%ID^E:2e-116^RecName: Full=Molybdate-anion transporter;^Eukaryota; Metazoa; Chordata; Craniata; Vertebrata; Euteleostomi; Mammalia; Eutheria; Euarchontoglires; Primates; Haplorrhini; Catarrhini; Hominidae; Homo	PF05631.11^MFS_5^Sugar-tranasporters, 12 TM^6-339^E:2.8e-86`PF07690.13^MFS_1^Major Facilitator Superfamily^46-382^E:5.9e-17
5	protonephridia	CapteG199877	9.89e-08	0.651859	0.3	0.121	0.00162498	.	.
5	protonephridia	CapteG153402	0.0245791	0.645587	0.3	0.229	1
5	protonephridia	CapteG89422	3.51e-07	0.628858	0.256	0.097	0.00577395	.	PF02420.12^AFP^Insect antifreeze protein repeat^2-10^E:270`PF02420.12^AFP^Insect antifreeze protein repeat^13-21^E:240`PF02420.12^AFP^Insect antifreeze protein repeat^24-32^E:240`PF02420.12^AFP^Insect antifreeze protein repeat^46-54^E:240`PF02420.12^AFP^Insect antifreeze protein repeat^57-65^E:240`PF02420.12^AFP^Insect antifreeze protein repeat^68-76^E:240`PF02420.12^AFP^Insect antifreeze protein…
5	protonephridia	CapteG157450	5.1e-08	0.618902	0.4	0.177	0.000837244	UBIM_HUMAN^UBIM_HUMAN^Q:157-375,H:1-74^56.76%ID^E:2e-18^RecName: Full=Ubiquitin-like protein FUBI;^Eukaryota; Metazoa; Chordata; Craniata; Vertebrata; Euteleostomi; Mammalia; Eutheria; Euarchontoglires; Primates; Haplorrhini; Catarrhini; Hominidae; Homo	PF00240.20^ubiquitin^Ubiquitin family^6-70^E:1.9e-10`PF04758.11^Ribosomal_S30^Ribosomal protein S30^74-131^E:2.5e-29
5	protonephridia	CapteG221936	0.000762097	0.600905	0.344	0.215	1
5	protonephridia	CapteG173854	6.61e-06	0.559645	0.256	0.11	0.108634	RLP24_DANRE^RLP24_DANRE^Q:21-473,H:1-151^73.51%ID^E:3e-76^RecName: Full=Probable ribosome biogenesis protein RLP24;^Eukaryota; Metazoa; Chordata; Craniata; Vertebrata; Euteleostomi; Actinopterygii; Neopterygii; Teleostei; Ostariophysi; Cypriniformes; Cyprinidae; Danio	PF01246.17^Ribosomal_L24e^Ribosomal protein L24e^1-65^E:2.5e-31
5	protonephridia	CapteG127344	0.000336106	0.4963	0.422	0.279	1	.	PF01609.18^DDE_Tnp_1^Transposase DDE domain^23-160^E:3.8e-08`PF13359.3^DDE_Tnp_4^DDE superfamily endonuclease^26-185^E:8.6e-41
5	protonephridia	CapteG212678	7.21e-05	0.460405	0.544	0.363	1	.	PF00001.18^7tm_1^7 transmembrane receptor (rhodopsin family)^48-298^E:5e-11
5	protonephridia	CapteG222520	0.00163515	0.419749	0.356	0.225	1	.	PF15299.3^ALS2CR8^Amyotrophic lateral sclerosis 2 chromosomal region candidate gene 8^353-450^E:1.3e-10
5	protonephridia	CapteG192361	0.00509562	0.381226	0.267	0.162	1	.	.
5	protonephridia	CapteG213170	0.185899	0.358609	0.333	0.293	1	RBBP6_MOUSE^RBBP6_MOUSE^Q:4-459,H:56-224^34.3%ID^E:2e-22^RecName: Full=E3 ubiquitin-protein ligase RBBP6;^Eukaryota; Metazoa; Chordata; Craniata; Vertebrata; Euteleostomi; Mammalia; Eutheria; Euarchontoglires; Glires; Rodentia; Sciurognathi; Muroidea; Muridae; Murinae; Mus; Mus	.
5	protonephridia	CapteG191586	0.00549149	0.349139	0.311	0.202	1	.	.
5	protonephridia	CapteG214276	0.000102291	0.345303	0.711	0.538	1	.	.
5	protonephridia	CapteG218321	0.0136656	0.330626	0.356	0.257	1	CHST1_DANRE^CHST1_DANRE^Q:226-1344,H:69-393^26.08%ID^E:3e-18^RecName: Full=Carbohydrate sulfotransferase 1;^Eukaryota; Metazoa; Chordata; Craniata; Vertebrata; Euteleostomi; Actinopterygii; Neopterygii; Teleostei; Ostariophysi; Cypriniformes; Cyprinidae; Danio	PF00685.24^Sulfotransfer_1^Sulfotransferase domain^76-442^E:2.2e-12`PF13469.3^Sulfotransfer_3^Sulfotransferase family^197-387^E:3.5e-11
5	protonephridia	CapteG205235	0.00660467	0.329891	0.322	0.216	1	.	.
5	protonephridia	CapteG123256	0.0146133	0.328028	0.389	0.289	1	.	.
5	protonephridia	CapteG185085	0.000587707	0.32775	0.311	0.174	1	S22AO_PONAB^S22AO_PONAB^Q:1-369,H:1-134^32.62%ID^E:4e-09^RecName: Full=Solute carrier family 22 member 24;^Eukaryota; Metazoa; Chordata; Craniata; Vertebrata; Euteleostomi; Mammalia; Eutheria; Euarchontoglires; Primates; Haplorrhini; Catarrhini; Hominidae; Pongo	.
5	protonephridia	CapteG48374	0.00576603	0.321017	0.511	0.387	1	MET_LOXAF^MET_LOXAF^Q:37-387,H:1083-1197^50.43%ID^E:3e-32^RecName: Full=Hepatocyte growth factor receptor;^Eukaryota; Metazoa; Chordata; Craniata; Vertebrata; Euteleostomi; Mammalia; Eutheria; Afrotheria; Proboscidea; Elephantidae; Loxodonta	PF07714.14^Pkinase_Tyr^Protein tyrosine kinase^11-129^E:2.7e-28`PF00069.22^Pkinase^Protein kinase domain^12-128^E:1.5e-14
5	protonephridia	tRNA-Val.27	0.00209323	0.311652	0.289	0.171	1
5	protonephridia	CapteG71272	0.00386235	0.310927	0.322	0.205	1	GLR1_CAEEL^GLR1_CAEEL^Q:1-201,H:659-725^40.3%ID^E:2e-11^RecName: Full=Glutamate receptor 1 {ECO:0000312|WormBase:C06E1.4};^Eukaryota; Metazoa; Ecdysozoa; Nematoda; Chromadorea; Rhabditida; Rhabditoidea; Rhabditidae; Peloderinae; Caenorhabditis	PF00060.23^Lig_chan^Ligand-gated ion channel^1-50^E:1.2e-11
5	protonephridia	CapteG209661	0.130528	0.31005	0.278	0.22	1	.	.
5	protonephridia	CapteG131081	0.0341211	0.307889	0.611	0.523	1	PF07_PLAF7^PF07_PLAF7^Q:1-231,H:808-884^49.35%ID^E:4e-09^RecName: Full=Uncharacterized protein PFC0810c {ECO:0000312|EMBL:CAB11130.1};^Eukaryota; Alveolata; Apicomplexa; Aconoidasida; Haemosporida; Plasmodiidae; Plasmodium; Plasmodium (Laverania)`PF07_PLAF7^PF07_PLAF7^Q:1-201,H:820-886^50.75%ID^E:1e-07^RecName: Full=Uncharacterized protein PFC0810c {ECO:0000312|EMBL:CAB11130.1};^Eukaryota; Alveol…	.
5	protonephridia	CapteG206212	0.0583923	0.306888	0.278	0.205	1	.	PF03372.20^Exo_endo_phos^Endonuclease/Exonuclease/phosphatase family^347-515^E:8.4e-05
5	protonephridia	CapteG188040	0.00288576	0.30393	0.411	0.276	1	.	PF03184.16^DDE_1^DDE superfamily endonuclease^87-196^E:1.1e-11
5	protonephridia	CapteG214331	0.00228477	0.297087	0.622	0.497	1	.	.
5	protonephridia	CapteG191464	0.176214	0.279457	0.256	0.206	1	.	.
5	protonephridia	CapteG213352	0.026178	0.275718	0.267	0.183	1	MAL1_DROVI^MAL1_DROVI^Q:31-171,H:474-520^55.32%ID^E:2e-10^RecName: Full=Maltase 1;^Eukaryota; Metazoa; Ecdysozoa; Arthropoda; Hexapoda; Insecta; Pterygota; Neoptera; Endopterygota; Diptera; Brachycera; Muscomorpha; Ephydroidea; Drosophilidae; Drosophila	.
5	protonephridia	CapteG110813	0.000175248	0.272792	0.944	0.766	1	RAB30_MOUSE^RAB30_MOUSE^Q:1-546,H:3-184^71.98%ID^E:2e-94^RecName: Full=Ras-related protein Rab-30;^Eukaryota; Metazoa; Chordata; Craniata; Vertebrata; Euteleostomi; Mammalia; Eutheria; Euarchontoglires; Glires; Rodentia; Sciurognathi; Muroidea; Muridae; Murinae; Mus; Mus	PF00025.18^Arf^ADP-ribosylation factor family^8-161^E:9.9e-13`PF00071.19^Ras^Ras family^9-168^E:3.7e-55`PF08477.10^Roc^Ras of Complex, Roc, domain of DAPkinase^9-123^E:1.5e-34`PF04670.9^Gtr1_RagA^Gtr1/RagA G protein conserved region^9-125^E:1.6e-05`PF01926.20^MMR_HSR1^50S ribosome-binding GTPase^9-95^E:5.9e-05
5	protonephridia	CapteG86125	0.198792	0.267397	0.411	0.366	1	RTBS_DROME^RTBS_DROME^Q:10-396,H:709-835^23.66%ID^E:3e-06^RecName: Full=Probable RNA-directed DNA polymerase from transposon BS;^Eukaryota; Metazoa; Ecdysozoa; Arthropoda; Hexapoda; Insecta; Pterygota; Neoptera; Endopterygota; Diptera; Brachycera; Muscomorpha; Ephydroidea; Drosophilidae; Drosophila; Sophophora	PF09004.7^DUF1891^Domain of unknown function (DUF1891)^59-100^E:4.5e-05
5	protonephridia	CapteG110933	0.00831312	0.264342	0.267	0.164	1	MCMBP_HUMAN^MCMBP_HUMAN^Q:1-300,H:532-631^40%ID^E:3e-09^RecName: Full=Mini-chromosome maintenance complex-binding protein;^Eukaryota; Metazoa; Chordata; Craniata; Vertebrata; Euteleostomi; Mammalia; Eutheria; Euarchontoglires; Primates; Haplorrhini; Catarrhini; Hominidae; Homo	PF09739.6^MCM_bind^Mini-chromosome maintenance replisome factor^4-100^E:2.2e-23
5	protonephridia	CapteG173907	0.0141768	0.264308	0.289	0.192	1	DEGS1_BOVIN^DEGS1_BOVIN^Q:1-942,H:1-314^57.96%ID^E:6e-139^RecName: Full=Sphingolipid delta(4)-desaturase DES1;^Eukaryota; Metazoa; Chordata; Craniata; Vertebrata; Euteleostomi; Mammalia; Eutheria; Laurasiatheria; Cetartiodactyla; Ruminantia; Pecora; Bovidae; Bovinae; Bos	PF08557.7^Lipid_DES^Sphingolipid Delta4-desaturase (DES)^6-41^E:5.2e-21`PF00487.21^FA_desaturase^Fatty acid desaturase^66-291^E:6.4e-24
5	protonephridia	CapteG129395	0.0649641	0.261388	0.433	0.382	1	.	.
5	protonephridia	CapteG218202	0.119766	0.254079	0.267	0.209	1	.	.
5	protonephridia	CapteG101209	0.0377358	0.251778	0.511	0.42	1	S35D3_MOUSE^S35D3_MOUSE^Q:22-948,H:11-319^32.59%ID^E:1e-34^RecName: Full=Solute carrier family 35 member D3;^Eukaryota; Metazoa; Chordata; Craniata; Vertebrata; Euteleostomi; Mammalia; Eutheria; Euarchontoglires; Glires; Rodentia; Sciurognathi; Muroidea; Muridae; Murinae; Mus; Mus	PF03151.13^TPT^Triose-phosphate Transporter family^9-294^E:8.3e-13
5	protonephridia	CapteG221730	0.000686208	0.251154	0.833	0.658	1	NKD1_MOUSE^NKD1_MOUSE^Q:412-1080,H:117-304^34.36%ID^E:9e-21^RecName: Full=Protein naked cuticle homolog 1;^Eukaryota; Metazoa; Chordata; Craniata; Vertebrata; Euteleostomi; Mammalia; Eutheria; Euarchontoglires; Glires; Rodentia; Sciurognathi; Muroidea; Muridae; Murinae; Mus; Mus	.
