# Supplementary material for: Resolving Transcriptional States and Predicting Lineages in the Annelid Capitella teleta Using Single-Cell RNAseq
Source: Frontiers journal article supplement (doi:10.3389/fevo.2020.618007), 2021-01-26
Supplement: Table_2.XLSX [file Table_2.XLSX]

## Sheet: TableS3_ST4_gene_annotations_v2
Table S3: Feature annotations for each cluster identified in the stage 4 dataset
Cluster_Identity	Gene_annotation	p_val	avg_logFC	pct.1	pct.2	p_val_adj	Top_BLASTX_hit	Pfam
precursors	CAPTEDRAFT-183463	1.98e-97	0.315632	1	1	2.25e-93	ATP6_LUMTE^ATP6_LUMTE^Q:1-678,H:5-229^35.65%ID^E:8e-28^RecName: Full=ATP synthase subunit a;^Eukaryota; Metazoa; Lophotrochozoa; Annelida; Clitellata; Oligochaeta; Haplotaxida; Lumbricina; Lumbricidae; Lumbricinae; Lumbricus	PF00119.17^ATP-synt_A^ATP synthase A chain^12-163^E:6.4e-24
precursors	CAPTEDRAFT-218805	4.52e-94	0.319861	1	1	5.14e-90	COX3_LUMTE^COX3_LUMTE^Q:231-731,H:56-259^55.39%ID^E:6e-58^RecName: Full=Cytochrome c oxidase subunit 3;^Eukaryota; Metazoa; Lophotrochozoa; Annelida; Clitellata; Oligochaeta; Haplotaxida; Lumbricina; Lumbricidae; Lumbricinae; Lumbricus	PF00510.15^COX3^Cytochrome c oxidase subunit III^11-111^E:2.4e-29`PF00510.15^COX3^Cytochrome c oxidase subunit III^112-170^E:6.2e-23
precursors	CAPTEDRAFT-228675	2.56e-79	0.357477	1	1	2.91e-75	NU4M_LUMTE^NU4M_LUMTE^Q:175-981,H:120-450^36.14%ID^E:6e-58^RecName: Full=NADH-ubiquinone oxidoreductase chain 4;^Eukaryota; Metazoa; Lophotrochozoa; Annelida; Clitellata; Oligochaeta; Haplotaxida; Lumbricina; Lumbricidae; Lumbricinae; Lumbricus	PF00361.17^Proton_antipo_M^Proton-conducting membrane transporter^59-229^E:1.5e-25
precursors	CAPTEDRAFT-165233	2.17e-57	0.311979	1	1	2.47e-53	NU1M_LUMTE^NU1M_LUMTE^Q:21-851,H:16-290^51.62%ID^E:2e-88^RecName: Full=NADH-ubiquinone oxidoreductase chain 1;^Eukaryota; Metazoa; Lophotrochozoa; Annelida; Clitellata; Oligochaeta; Haplotaxida; Lumbricina; Lumbricidae; Lumbricinae; Lumbricus	PF00146.18^NADHdh^NADH dehydrogenase^1-152^E:2.2e-35
precursors	CAPTEDRAFT-161800	0.280117	0.256381	0.346	0.321	1	PCNA_CRIGR^PCNA_CRIGR^Q:84-866,H:1-261^70.88%ID^E:2e-138^RecName: Full=Proliferating cell nuclear antigen;^Eukaryota; Metazoa; Chordata; Craniata; Vertebrata; Euteleostomi; Mammalia; Eutheria; Euarchontoglires; Glires; Rodentia; Sciurognathi; Muroidea; Cricetidae; Cricetinae; Cricetulus									KEGG:cge:100689335`KO:K04802	GO:0070557^cellular_component^PCNA-p21 complex`GO:0003677^molecular_function^DNA binding`GO:0030337^molecular_function^DNA polymerase processivity factor activity`GO:0042802^molecular_function^identical protein binding`GO:0006260^biological_process^DNA replication`GO:0032077^biological_process^positive regulation of deoxyribonuclease activity`GO:0006275^biological_process^regulation of DNA replic…	GO:0003677^molecular_function^DNA binding`GO:0006275^biological_process^regulation of DNA replication`GO:0006281^biological_process^DNA repair`GO:0005634^cellular_component^nucleus`GO:0000077^biological_process^DNA damage checkpoint`GO:0030896^cellular_component^checkpoint clamp complex
precursors	CAPTEDRAFT-158856	0.305284	0.252701	0.384	0.352	1	NH2L1_XENLA^NH2L1_XENLA^Q:93-476,H:1-128^85.16%ID^E:9e-65^RecName: Full=NHP2-like protein 1;^Eukaryota; Metazoa; Chordata; Craniata; Vertebrata; Euteleostomi; Amphibia; Batrachia; Anura; Pipoidea; Pipidae; Xenopodinae; Xenopus; Xenopus									KEGG:xla:495253`KO:K12845	GO:0005730^cellular_component^nucleolus`GO:0005681^cellular_component^spliceosomal complex`GO:0003723^molecular_function^RNA binding`GO:0006397^biological_process^mRNA processing`GO:0042254^biological_process^ribosome biogenesis`GO:0008380^biological_process^RNA splicing
extracellular matrix	CAPTEDRAFT-220834	0.00494631	0.422048	0.367	0.357	1	LAMA_DROME^LAMA_DROME^Q:2149-5877,H:1308-2548^27.58%ID^E:3e-107^RecName: Full=Laminin subunit alpha;^Eukaryota; Metazoa; Ecdysozoa; Arthropoda; Hexapoda; Insecta; Pterygota; Neoptera; Endopterygota; Diptera; Brachycera; Muscomorpha; Ephydroidea; Drosophilidae; Drosophila; Sophophora`LAMA_DROME^LAMA_DROME^Q:3607-4626,H:466-772^31.71%ID^E:1e-30^RecName: Full=Laminin subunit alpha;^Eukaryota; Metazo…	PF00053.21^Laminin_EGF^Laminin EGF domain^282-334^E:9.3e-06`PF00053.21^Laminin_EGF^Laminin EGF domain^337-385^E:0.0021`PF00053.21^Laminin_EGF^Laminin EGF domain^418-469^E:5.1e-09`PF00053.21^Laminin_EGF^Laminin EGF domain^472-520^E:5.6e-10`PF00053.21^Laminin_EGF^Laminin EGF domain^523-559^E:0.00017`PF00053.21^Laminin_EGF^Laminin EGF domain^784-831^E:1.6e-06`PF00053.21^Laminin_EGF^Laminin EGF domai…
extracellular matrix	CAPTEDRAFT-158220	0.0287873	0.420207	0.282	0.257	1	HMG2_DROME^HMG2_DROME^Q:134-625,H:174-344^61.99%ID^E:3e-63^RecName: Full=High mobility group protein DSP1;^Eukaryota; Metazoa; Ecdysozoa; Arthropoda; Hexapoda; Insecta; Pterygota; Neoptera; Endopterygota; Diptera; Brachycera; Muscomorpha; Ephydroidea; Drosophilidae; Drosophila; Sophophora	PF09011.7^HMG_box_2^HMG-box domain^6-77^E:1.1e-23`PF00505.16^HMG_box^HMG (high mobility group) box^12-77^E:5.2e-17`PF09011.7^HMG_box_2^HMG-box domain^92-160^E:9e-13`PF00505.16^HMG_box^HMG (high mobility group) box^95-161^E:3.4e-17
extracellular matrix	CAPTEDRAFT-221425	0.0210528	0.418483	0.295	0.279	1
extracellular matrix	CAPTEDRAFT-221766	0.154085	0.415743	0.297	0.312	1	VINC_DROME^VINC_DROME^Q:1-2925,H:1-959^54.29%ID^E:0^RecName: Full=Vinculin;^Eukaryota; Metazoa; Ecdysozoa; Arthropoda; Hexapoda; Insecta; Pterygota; Neoptera; Endopterygota; Diptera; Brachycera; Muscomorpha; Ephydroidea; Drosophilidae; Drosophila; Sophophora	PF01044.16^Vinculin^Vinculin family^3-975^E:0
extracellular matrix	CAPTEDRAFT-221070	0.0203678	0.413754	0.292	0.266	1	NRG_DROME^NRG_DROME^Q:9-1571,H:28-515^25.14%ID^E:7e-43^RecName: Full=Neuroglian;^Eukaryota; Metazoa; Ecdysozoa; Arthropoda; Hexapoda; Insecta; Pterygota; Neoptera; Endopterygota; Diptera; Brachycera; Muscomorpha; Ephydroidea; Drosophilidae; Drosophila; Sophophora`NRG_DROME^NRG_DROME^Q:342-1571,H:261-609^23.98%ID^E:2e-14^RecName: Full=Neuroglian;^Eukaryota; Metazoa; Ecdysozoa; Arthropoda; Hexapoda…	PF13927.3^Ig_3^Immunoglobulin domain^2-80^E:2.5e-14`PF13895.3^Ig_2^Immunoglobulin domain^3-89^E:1.4e-07`PF07679.13^I-set^Immunoglobulin I-set domain^15-89^E:2e-11`PF00047.22^ig^Immunoglobulin domain^20-88^E:3.5e-06`PF07679.13^I-set^Immunoglobulin I-set domain^214-301^E:7.3e-13`PF13927.3^Ig_3^Immunoglobulin domain^215-286^E:5.3e-11`PF00047.22^ig^Immunoglobulin domain^215-296^E:2.4e-09`PF07679.13^I…
extracellular matrix	CAPTEDRAFT-176233	0.0332212	0.413199	0.264	0.238	1		PF00822.17^PMP22_Claudin^PMP-22/EMP/MP20/Claudin family^249-411^E:1e-08
extracellular matrix	CAPTEDRAFT-176480	0.0360252	0.412716	0.282	0.253	1	ASH1L_MOUSE^ASH1L_MOUSE^Q:205-2631,H:1984-2822^50.06%ID^E:0^RecName: Full=Histone-lysine N-methyltransferase ASH1L;^Eukaryota; Metazoa; Chordata; Craniata; Vertebrata; Euteleostomi; Mammalia; Eutheria; Euarchontoglires; Glires; Rodentia; Sciurognathi; Muroidea; Muridae; Murinae; Mus; Mus	.								KEGG:mmu:192195`KO:K06101	GO:0005923^cellular_component^bicellular tight junction`GO:0005694^cellular_component^chromosome`GO:0005737^cellular_component^cytoplasm`GO:0070062^cellular_component^extracellular exosome`GO:0005794^cellular_component^Golgi apparatus`GO:0005654^cellular_component^nucleoplasm`GO:0003682^molecular_function^chromatin binding`GO:0003677^molecular_function^DNA binding`GO:0046975^molecular_function^hi…	GO:0005515^molecular_function^protein binding`GO:0003682^molecular_function^chromatin binding
extracellular matrix	CAPTEDRAFT-178663	0.0170748	0.410163	0.349	0.335	1	FRM4A_HUMAN^FRM4A_HUMAN^Q:74-1510,H:16-487^56.67%ID^E:6e-179^RecName: Full=FERM domain-containing protein 4A;^Eukaryota; Metazoa; Chordata; Craniata; Vertebrata; Euteleostomi; Mammalia; Eutheria; Euarchontoglires; Primates; Haplorrhini; Catarrhini; Hominidae; Homo	.								KEGG:hsa:55691	GO:0005923^cellular_component^bicellular tight junction`GO:0005737^cellular_component^cytoplasm`GO:0005856^cellular_component^cytoskeleton`GO:0090162^biological_process^establishment of epithelial cell polarity	.
extracellular matrix	CAPTEDRAFT-179193	0.0106998	0.408127	0.251	0.207	1	CTNA_DROME^CTNA_DROME^Q:1-2682,H:13-910^67.15%ID^E:0^RecName: Full=Catenin alpha;^Eukaryota; Metazoa; Ecdysozoa; Arthropoda; Hexapoda; Insecta; Pterygota; Neoptera; Endopterygota; Diptera; Brachycera; Muscomorpha; Ephydroidea; Drosophilidae; Drosophila; Sophophora	PF01044.16^Vinculin^Vinculin family^14-322^E:3.8e-89`PF01044.16^Vinculin^Vinculin family^327-861^E:3.7e-196
extracellular matrix	CAPTEDRAFT-162333	0.000272458	0.403183	0.576	0.599	1
extracellular matrix	CAPTEDRAFT-226653	0.0185728	0.396552	0.261	0.226	1	CADN_DROME^CADN_DROME^Q:295-9000,H:185-3083^30.39%ID^E:0^RecName: Full=Neural-cadherin;^Eukaryota; Metazoa; Ecdysozoa; Arthropoda; Hexapoda; Insecta; Pterygota; Neoptera; Endopterygota; Diptera; Brachycera; Muscomorpha; Ephydroidea; Drosophilidae; Drosophila; Sophophora	PF00028.14^Cadherin^Cadherin domain^1204-1286^E:1.5e-10`PF00028.14^Cadherin^Cadherin domain^1539-1624^E:1.1e-12`PF00028.14^Cadherin^Cadherin domain^1753-1844^E:6.7e-17`PF00008.24^EGF^EGF-like domain^2251-2281^E:2.1e-06`PF12661.4^hEGF^Human growth factor-like EGF^2271-2282^E:0.043`PF02210.21^Laminin_G_2^Laminin G domain^2312-2472^E:2e-18`PF00054.20^Laminin_G_1^Laminin G domain^2312-2472^E:9.9e-09`…
extracellular matrix	CAPTEDRAFT-164782	0.0103083	0.394135	0.315	0.287	1
extracellular matrix	CAPTEDRAFT-219379	0.219712	0.384718	0.284	0.297	1		PF13903.3^Claudin_2^PMP-22/EMP/MP20/Claudin tight junction^16-179^E:1.7e-17
extracellular matrix	CAPTEDRAFT-226167	0.0107438	0.384003	0.261	0.219	1	ANXA7_MACFA^ANXA7_MACFA^Q:581-1504,H:179-486^54.87%ID^E:2e-111^RecName: Full=Annexin A7;^Eukaryota; Metazoa; Chordata; Craniata; Vertebrata; Euteleostomi; Mammalia; Eutheria; Euarchontoglires; Primates; Haplorrhini; Catarrhini; Cercopithecidae; Cercopithecinae; Macaca	PF00191.17^Annexin^Annexin^36-100^E:2.9e-24`PF00191.17^Annexin^Annexin^107-172^E:4.5e-24`PF00191.17^Annexin^Annexin^190-256^E:1.3e-24`PF00191.17^Annexin^Annexin^266-331^E:2.3e-24
extracellular matrix	CAPTEDRAFT-171942	0.0577115	0.377189	0.292	0.285	1	RS3_PIG^RS3_PIG^Q:53-766,H:1-237^88.66%ID^E:2e-148^RecName: Full=40S ribosomal protein S3;^Eukaryota; Metazoa; Chordata; Craniata; Vertebrata; Euteleostomi; Mammalia; Eutheria; Laurasiatheria; Cetartiodactyla; Suina; Suidae; Sus	PF07650.14^KH_2^KH domain^20-93^E:1.5e-11`PF00189.17^Ribosomal_S3_C^Ribosomal protein S3, C-terminal domain^106-188^E:1.7e-22
extracellular matrix	CAPTEDRAFT-221883	0.00673002	0.377119	0.432	0.437	1
extracellular matrix	CAPTEDRAFT-158294	0.143771	0.376547	0.253	0.251	1	LAP2_RAT^LAP2_RAT^Q:29-388,H:7-138^40.6%ID^E:8e-17^RecName: Full=Lamina-associated polypeptide 2, isoform beta;^Eukaryota; Metazoa; Chordata; Craniata; Vertebrata; Euteleostomi; Mammalia; Eutheria; Euarchontoglires; Glires; Rodentia; Sciurognathi; Muroidea; Muridae; Murinae; Rattus	PF08198.8^Thymopoietin^Thymopoietin protein^2-40^E:1.1e-15`PF03020.12^LEM^LEM domain^93-132^E:4.1e-15
extracellular matrix	CAPTEDRAFT-182411	0.383872	0.373952	0.269	0.291	1	LAMC_DROME^LAMC_DROME^Q:34-1815,H:11-620^39.97%ID^E:3e-111^RecName: Full=Lamin-C;^Eukaryota; Metazoa; Ecdysozoa; Arthropoda; Hexapoda; Insecta; Pterygota; Neoptera; Endopterygota; Diptera; Brachycera; Muscomorpha; Ephydroidea; Drosophilidae; Drosophila; Sophophora	PF00038.18^Filament^Intermediate filament protein^43-399^E:7.9e-67`PF00932.16^LTD^Lamin Tail Domain^460-565^E:2.7e-14
extracellular matrix	CAPTEDRAFT-196824	0.32138	0.356046	0.31	0.346	1	P4HA2_HUMAN^P4HA2_HUMAN^Q:55-297,H:18-97^32.1%ID^E:1e-08^RecName: Full=Prolyl 4-hydroxylase subunit alpha-2;^Eukaryota; Metazoa; Chordata; Craniata; Vertebrata; Euteleostomi; Mammalia; Eutheria; Euarchontoglires; Primates; Haplorrhini; Catarrhini; Hominidae; Homo	PF08336.8^P4Ha_N^Prolyl 4-Hydroxylase alpha-subunit, N-terminal region^27-106^E:5.9e-15
ciliary-band	CAPTEDRAFT-228963	1.23e-97	1.67015	0.805	0.026	1.39e-93	.	.
ciliary-band	CAPTEDRAFT-226664	9.41e-89	1.76006	0.805	0.033	1.07e-84	.	PF07699.10^Ephrin_rec_like^Putative ephrin-receptor like^4394-4437^E:4e-06
ciliary-band	CAPTEDRAFT-175142	1.94e-83	1.52276	0.683	0.022	2.2e-79	DYHC_TRIGR^DYHC_TRIGR^Q:13-13389,H:6-4466^73.96%ID^E:0^RecName: Full=Dynein beta chain, ciliary;^Eukaryota; Metazoa; Echinodermata; Eleutherozoa; Echinozoa; Echinoidea; Euechinoidea; Echinacea; Temnopleuroida; Toxopneustidae; Tripneustes	PF08385.9^DHC_N1^Dynein heavy chain, N-terminal region 1^191-765^E:4.2e-182`PF08393.10^DHC_N2^Dynein heavy chain, N-terminal region 2^1270-1672^E:8.1e-125`PF12774.4^AAA_6^Hydrolytic ATP binding site of dynein motor region D1^1808-2038^E:1.8e-149`PF07728.11^AAA_5^AAA domain (dynein-related subfamily)^2123-2248^E:4.4e-12`PF12775.4^AAA_7^P-loop containing dynein motor region D3^2415-2685^E:7e-154`PF…
ciliary-band	CAPTEDRAFT-174571	6e-67	1.17229	0.512	0.013	6.82e-63	DYHC2_TRIGR^DYHC2_TRIGR^Q:1-12927,H:1-4318^64.61%ID^E:0^RecName: Full=Cytoplasmic dynein 2 heavy chain 1;^Eukaryota; Metazoa; Echinodermata; Eleutherozoa; Echinozoa; Echinoidea; Euechinoidea; Echinacea; Temnopleuroida; Toxopneustidae; Tripneustes	PF08385.9^DHC_N1^Dynein heavy chain, N-terminal region 1^186-645^E:9.2e-41`PF08393.10^DHC_N2^Dynein heavy chain, N-terminal region 2^1115-1514^E:1.9e-110`PF12774.4^AAA_6^Hydrolytic ATP binding site of dynein motor region D1^1651-1880^E:4.8e-82`PF07728.11^AAA_5^AAA domain (dynein-related subfamily)^1977-2112^E:6.5e-25`PF12775.4^AAA_7^P-loop containing dynein motor region D3^2283-2507^E:8.8e-18`PF1…
ciliary-band	CAPTEDRAFT-228350	1.71e-53	1.11086	0.415	0.011	1.94e-49	DYH7_HUMAN^DYH7_HUMAN^Q:1-7251,H:1606-4024^71.06%ID^E:0^RecName: Full=Dynein heavy chain 7, axonemal;^Eukaryota; Metazoa; Chordata; Craniata; Vertebrata; Euteleostomi; Mammalia; Eutheria; Euarchontoglires; Primates; Haplorrhini; Catarrhini; Hominidae; Homo	PF12775.4^AAA_7^P-loop containing dynein motor region D3^340-604^E:9.5e-54`PF07728.11^AAA_5^AAA domain (dynein-related subfamily)^367-504^E:0.00019`PF12780.4^AAA_8^P-loop containing dynein motor region D4^703-967^E:5.1e-70`PF12777.4^MT^Microtubule-binding stalk of dynein motor^980-1323^E:7.3e-51`PF12781.4^AAA_9^ATP-binding dynein motor region D5^1351-1575^E:7.6e-96`PF03028.12^Dynein_heavy^Dynein …
ciliary-band	CAPTEDRAFT-195412	4.01e-51	1.04067	0.39	0.01	4.56e-47	HYDIN_HUMAN^HYDIN_HUMAN^Q:85-6537,H:46-2169^42.66%ID^E:0^RecName: Full=Hydrocephalus-inducing protein homolog;^Eukaryota; Metazoa; Chordata; Craniata; Vertebrata; Euteleostomi; Mammalia; Eutheria; Euarchontoglires; Primates; Haplorrhini; Catarrhini; Hominidae; Homo`HYDIN_HUMAN^HYDIN_HUMAN^Q:7765-12309,H:2439-3925^41.17%ID^E:0^RecName: Full=Hydrocephalus-inducing protein homolog;^Eukaryota; Metazo…	.
ciliary-band	CAPTEDRAFT-19382	6.37e-49	1.16059	0.39	0.011	7.24e-45	DYH5_HUMAN^DYH5_HUMAN^Q:1-3147,H:3566-4624^71.72%ID^E:0^RecName: Full=Dynein heavy chain 5, axonemal;^Eukaryota; Metazoa; Chordata; Craniata; Vertebrata; Euteleostomi; Mammalia; Eutheria; Euarchontoglires; Primates; Haplorrhini; Catarrhini; Hominidae; Homo	PF12781.4^AAA_9^ATP-binding dynein motor region D5^7-230^E:7.9e-87`PF03028.12^Dynein_heavy^Dynein heavy chain and region D6 of dynein motor^358-1046^E:6.5e-245
ciliary-band	CAPTEDRAFT-222082	8.07e-47	0.919464	0.39	0.012	9.18e-43	HYDIN_MOUSE^HYDIN_MOUSE^Q:4-3417,H:4020-5154^46.58%ID^E:0^RecName: Full=Hydrocephalus-inducing protein;^Eukaryota; Metazoa; Chordata; Craniata; Vertebrata; Euteleostomi; Mammalia; Eutheria; Euarchontoglires; Glires; Rodentia; Sciurognathi; Muroidea; Muridae; Murinae; Mus; Mus	.
ciliary-band	CAPTEDRAFT-226971	1.39e-44	0.998879	0.366	0.011	1.58e-40	EFCB6_HUMAN^EFCB6_HUMAN^Q:103-4353,H:45-1501^26.07%ID^E:7e-138^RecName: Full=EF-hand calcium-binding domain-containing protein 6;^Eukaryota; Metazoa; Chordata; Craniata; Vertebrata; Euteleostomi; Mammalia; Eutheria; Euarchontoglires; Primates; Haplorrhini; Catarrhini; Hominidae; Homo`EFCB6_HUMAN^EFCB6_HUMAN^Q:883-4365,H:66-1247^19.38%ID^E:3e-22^RecName: Full=EF-hand calcium-binding domain-contain…	PF08976.8^EF-hand_11^EF-hand domain^58-128^E:0.00015`PF08976.8^EF-hand_11^EF-hand domain^173-259^E:7.6e-05`PF13202.3^EF-hand_5^EF hand^415-437^E:2e-06`PF13202.3^EF-hand_5^EF hand^761-782^E:0.069`PF13833.3^EF-hand_8^EF-hand domain pair^769-819^E:0.032`PF08976.8^EF-hand_11^EF-hand domain^1193-1247^E:0.00017
ciliary-band	CAPTEDRAFT-203606	6.38e-44	0.736336	0.341	0.009	7.26e-40	ITPR1_RAT^ITPR1_RAT^Q:286-2217,H:95-791^25.07%ID^E:3e-48^RecName: Full=Inositol 1,4,5-trisphosphate receptor type 1;^Eukaryota; Metazoa; Chordata; Craniata; Vertebrata; Euteleostomi; Mammalia; Eutheria; Euarchontoglires; Glires; Rodentia; Sciurognathi; Muroidea; Muridae; Murinae; Rattus`ITPR1_RAT^ITPR1_RAT^Q:6523-7536,H:2388-2731^31.09%ID^E:1e-26^RecName: Full=Inositol 1,4,5-trisphosphate recepto…	PF08709.8^Ins145_P3_rec^Inositol 1,4,5-trisphosphate/ryanodine receptor^6-205^E:4.7e-24`PF02815.16^MIR^MIR domain^237-329^E:1.2e-08`PF01365.18^RYDR_ITPR^RIH domain^466-636^E:1.3e-28`PF08454.8^RIH_assoc^RyR and IP3R Homology associated^1816-1908^E:2.9e-17
ciliary-band	CAPTEDRAFT-219244	5.96e-43	1.00105	0.415	0.018	6.77e-39	DAAF1_MOUSE^DAAF1_MOUSE^Q:316-1050,H:77-321^62.45%ID^E:5e-99^RecName: Full=Dynein assembly factor 1, axonemal;^Eukaryota; Metazoa; Chordata; Craniata; Vertebrata; Euteleostomi; Mammalia; Eutheria; Euarchontoglires; Glires; Rodentia; Sciurognathi; Muroidea; Muridae; Murinae; Mus; Mus	PF12799.4^LRR_4^Leucine Rich repeats (2 copies)^175-215^E:1.7e-06`PF14580.3^LRR_9^Leucine-rich repeat^198-320^E:2.9e-15
ciliary-band	CAPTEDRAFT-221957	2.28e-42	1.12922	0.39	0.015	2.59e-38	AXDN1_HUMAN^AXDN1_HUMAN^Q:1-2412,H:1-815^33.37%ID^E:2e-140^RecName: Full=Axonemal dynein light chain domain-containing protein 1;^Eukaryota; Metazoa; Chordata; Craniata; Vertebrata; Euteleostomi; Mammalia; Eutheria; Euarchontoglires; Primates; Haplorrhini; Catarrhini; Hominidae; Homo	PF10211.6^Ax_dynein_light^Axonemal dynein light chain^177-350^E:1.2e-09
ciliary-band	CAPTEDRAFT-219457	2.56e-41	1.02453	0.488	0.029	2.91e-37	DYI3_HELCR^DYI3_HELCR^Q:88-1671,H:1-528^76.89%ID^E:0^RecName: Full=Dynein intermediate chain 3, ciliary;^Eukaryota; Metazoa; Echinodermata; Eleutherozoa; Echinozoa; Echinoidea; Euechinoidea; Echinacea; Echinoida; Echinometridae; Heliocidaris	.
ciliary-band	CAPTEDRAFT-162628	1.37e-40	1.23839	0.341	0.011	1.56e-36	DYH5_HUMAN^DYH5_HUMAN^Q:1-13296,H:125-4624^63.07%ID^E:0^RecName: Full=Dynein heavy chain 5, axonemal;^Eukaryota; Metazoa; Chordata; Craniata; Vertebrata; Euteleostomi; Mammalia; Eutheria; Euarchontoglires; Primates; Haplorrhini; Catarrhini; Hominidae; Homo	PF08385.9^DHC_N1^Dynein heavy chain, N-terminal region 1^99-649^E:1.2e-174`PF08393.10^DHC_N2^Dynein heavy chain, N-terminal region 2^1188-1592^E:4.7e-125`PF12774.4^AAA_6^Hydrolytic ATP binding site of dynein motor region D1^1728-1959^E:1.1e-90`PF07728.11^AAA_5^AAA domain (dynein-related subfamily)^2046-2178^E:1e-05`PF12775.4^AAA_7^P-loop containing dynein motor region D3^2346-2609^E:3.6e-46`PF127…
ciliary-band	CAPTEDRAFT-174231	1.56e-38	1.16113	0.366	0.015	1.77e-34	FHAD1_HUMAN^FHAD1_HUMAN^Q:1-633,H:1134-1375^33.06%ID^E:5e-27^RecName: Full=Forkhead-associated domain-containing protein 1;^Eukaryota; Metazoa; Chordata; Craniata; Vertebrata; Euteleostomi; Mammalia; Eutheria; Euarchontoglires; Primates; Haplorrhini; Catarrhini; Hominidae; Homo	.
ciliary-band	CAPTEDRAFT-153089	8.68e-38	0.802176	0.317	0.01	9.87e-34	ANKE1_MOUSE^ANKE1_MOUSE^Q:1-2301,H:1-767^44.06%ID^E:0^RecName: Full=Ankyrin repeat and EF-hand domain-containing protein 1;^Eukaryota; Metazoa; Chordata; Craniata; Vertebrata; Euteleostomi; Mammalia; Eutheria; Euarchontoglires; Glires; Rodentia; Sciurognathi; Muroidea; Muridae; Murinae; Mus; Mus	PF12796.4^Ank_2^Ankyrin repeats (3 copies)^17-111^E:4.8e-12`PF00023.27^Ank^Ankyrin repeat^47-78^E:0.013`PF13637.3^Ank_4^Ankyrin repeats (many copies)^55-100^E:2.1e-05`PF12796.4^Ank_2^Ankyrin repeats (3 copies)^121-212^E:1e-08`PF13637.3^Ank_4^Ankyrin repeats (many copies)^154-202^E:1.2e-05`PF13606.3^Ank_3^Ankyrin repeat^184-212^E:0.0024`PF00023.27^Ank^Ankyrin repeat^186-212^E:0.012`PF00023.27^Ank^…
ciliary-band	CAPTEDRAFT-160880	2.13e-36	0.833555	0.366	0.016	2.42e-32	CFA43_HUMAN^CFA43_HUMAN^Q:1-4887,H:23-1665^35.56%ID^E:0^RecName: Full=Cilia- and flagella-associated protein 43 {ECO:0000312|HGNC:HGNC:26684};^Eukaryota; Metazoa; Chordata; Craniata; Vertebrata; Euteleostomi; Mammalia; Eutheria; Euarchontoglires; Primates; Haplorrhini; Catarrhini; Hominidae; Homo	.
ciliary-band	CAPTEDRAFT-228322	1.45e-35	0.806021	0.439	0.027	1.65e-31	FA47E_HUMAN^FA47E_HUMAN^Q:252-1352,H:40-370^29.11%ID^E:2e-34^RecName: Full=Protein FAM47E;^Eukaryota; Metazoa; Chordata; Craniata; Vertebrata; Euteleostomi; Mammalia; Eutheria; Euarchontoglires; Primates; Haplorrhini; Catarrhini; Hominidae; Homo	PF14642.3^FAM47^FAM47 family^21-168^E:3.4e-15
ciliary-band	CAPTEDRAFT-221453	5.72e-35	0.725982	0.268	0.007	6.5e-31	ANMY1_MOUSE^ANMY1_MOUSE^Q:142-3006,H:2-893^35.02%ID^E:8e-162^RecName: Full=Ankyrin repeat and MYND domain-containing protein 1;^Eukaryota; Metazoa; Chordata; Craniata; Vertebrata; Euteleostomi; Mammalia; Eutheria; Euarchontoglires; Glires; Rodentia; Sciurognathi; Muroidea; Muridae; Murinae; Mus; Mus	PF02493.17^MORN^MORN repeat^39-61^E:0.0027`PF02493.17^MORN^MORN repeat^62-84^E:2.5e-06`PF02493.17^MORN^MORN repeat^85-105^E:1.6e-05`PF02493.17^MORN^MORN repeat^115-135^E:0.52`PF12796.4^Ank_2^Ankyrin repeats (3 copies)^599-683^E:2.4e-06`PF12796.4^Ank_2^Ankyrin repeats (3 copies)^714-779^E:3.6e-06`PF01753.15^zf-MYND^MYND finger^954-994^E:1.6e-07
ciliary-band	CAPTEDRAFT-226966	1.3e-33	0.872218	0.293	0.01	1.47e-29	.	.
ciliary-band	CAPTEDRAFT-175674	4.11e-33	0.893767	0.317	0.013	4.68e-29	SYNE1_MOUSE^SYNE1_MOUSE^Q:154-7341,H:6384-8799^31.39%ID^E:0^RecName: Full=Nesprin-1;^Eukaryota; Metazoa; Chordata; Craniata; Vertebrata; Euteleostomi; Mammalia; Eutheria; Euarchontoglires; Glires; Rodentia; Sciurognathi; Muroidea; Muridae; Murinae; Mus; Mus	PF00435.18^Spectrin^Spectrin repeat^501-607^E:2.5e-06`PF00435.18^Spectrin^Spectrin repeat^732-837^E:3.8e-09`PF00435.18^Spectrin^Spectrin repeat^1160-1262^E:5.1e-07`PF00435.18^Spectrin^Spectrin repeat^1381-1479^E:3.9e-06`PF00435.18^Spectrin^Spectrin repeat^1589-1698^E:5.7e-06`PF00435.18^Spectrin^Spectrin repeat^2108-2211^E:3.1e-09`PF00435.18^Spectrin^Spectrin repeat^2217-2313^E:2.4e-05`PF10541.6^K…
ciliary-band	CAPTEDRAFT-92017	1.74e-30	0.876972	0.415	0.03	1.98e-26	IQCG_MOUSE^IQCG_MOUSE^Q:1-1059,H:47-395^42.54%ID^E:3e-86^RecName: Full=IQ domain-containing protein G;^Eukaryota; Metazoa; Chordata; Craniata; Vertebrata; Euteleostomi; Mammalia; Eutheria; Euarchontoglires; Glires; Rodentia; Sciurognathi; Muroidea; Muridae; Murinae; Mus; Mus	PF00612.24^IQ^IQ calmodulin-binding motif^332-348^E:0.00025
ciliary-band	CAPTEDRAFT-174329	2.01e-30	0.91263	0.317	0.015	2.29e-26	DYH1_HUMAN^DYH1_HUMAN^Q:58-12672,H:76-4330^64.51%ID^E:0^RecName: Full=Dynein heavy chain 1, axonemal;^Eukaryota; Metazoa; Chordata; Craniata; Vertebrata; Euteleostomi; Mammalia; Eutheria; Euarchontoglires; Primates; Haplorrhini; Catarrhini; Hominidae; Homo	PF08393.10^DHC_N2^Dynein heavy chain, N-terminal region 2^958-1361^E:1.1e-146`PF12774.4^AAA_6^Hydrolytic ATP binding site of dynein motor region D1^1487-1717^E:1.2e-98`PF07728.11^AAA_5^AAA domain (dynein-related subfamily)^1802-1946^E:4.1e-05`PF12775.4^AAA_7^P-loop containing dynein motor region D3^2135-2404^E:4.6e-50`PF12780.4^AAA_8^P-loop containing dynein motor region D4^2482-2751^E:9.4e-78`PF…
ciliary-band	CAPTEDRAFT-153643	2.45e-30	0.845883	0.39	0.026	2.78e-26	IQCA1_HUMAN^IQCA1_HUMAN^Q:180-2624,H:1-813^54.21%ID^E:0^RecName: Full=IQ and AAA domain-containing protein 1;^Eukaryota; Metazoa; Chordata; Craniata; Vertebrata; Euteleostomi; Mammalia; Eutheria; Euarchontoglires; Primates; Haplorrhini; Catarrhini; Hominidae; Homo	PF00612.24^IQ^IQ calmodulin-binding motif^210-226^E:0.023`PF00004.26^AAA^ATPase family associated with various cellular activities (AAA)^574-684^E:4.4e-12
ciliary-band	CAPTEDRAFT-170976	3.86e-30	1.36469	0.512	0.049	4.39e-26	CFA45_HUMAN^CFA45_HUMAN^Q:43-1647,H:25-550^45.42%ID^E:9e-86^RecName: Full=Cilia- and flagella-associated protein 45 {ECO:0000312|HGNC:HGNC:17229};^Eukaryota; Metazoa; Chordata; Craniata; Vertebrata; Euteleostomi; Mammalia; Eutheria; Euarchontoglires; Primates; Haplorrhini; Catarrhini; Hominidae; Homo	PF13868.3^TPH^Trichohyalin-plectin-homology domain^143-491^E:7.5e-80
ciliary-band	CAPTEDRAFT-221037	1.97e-29	0.89016	0.317	0.016	2.24e-25	.	.
gut	CAPTEDRAFT-199501	4.02e-48	1.94968	0.548	0.025	4.57e-44	.	.
gut	CAPTEDRAFT-168416	9.92e-64	1.74257	0.387	0.004	1.13e-59	FCGBP_HUMAN^FCGBP_HUMAN^Q:569-1840,H:1669-2086^31.29%ID^E:2e-40^RecName: Full=IgGFc-binding protein;^Eukaryota; Metazoa; Chordata; Craniata; Vertebrata; Euteleostomi; Mammalia; Eutheria; Euarchontoglires; Primates; Haplorrhini; Catarrhini; Hominidae; Homo`FCGBP_HUMAN^FCGBP_HUMAN^Q:569-1867,H:4071-4497^31.11%ID^E:2e-38^RecName: Full=IgGFc-binding protein;^Eukaryota; Metazoa; Chordata; Craniata; Ve…	PF00094.22^VWD^von Willebrand factor type D domain^180-333^E:1.4e-24`PF08742.8^C8^C8 domain^400-471^E:5.7e-10`PF01826.14^TIL^Trypsin Inhibitor like cysteine rich domain^475-530^E:2.1e-11`PF12714.4^TILa^TILa domain^538-588^E:1.2e-11`PF00014.20^Kunitz_BPTI^Kunitz/Bovine pancreatic trypsin inhibitor domain^723-774^E:3.5e-15`PF00014.20^Kunitz_BPTI^Kunitz/Bovine pancreatic trypsin inhibitor domain^783…
gut	CAPTEDRAFT-50637	2.92e-61	1.64023	0.355	0.003	3.32e-57	CO6A3_HUMAN^CO6A3_HUMAN^Q:1-159,H:3112-3164^45.28%ID^E:3e-11^RecName: Full=Collagen alpha-3(VI) chain;^Eukaryota; Metazoa; Chordata; Craniata; Vertebrata; Euteleostomi; Mammalia; Eutheria; Euarchontoglires; Primates; Haplorrhini; Catarrhini; Hominidae; Homo	PF00014.20^Kunitz_BPTI^Kunitz/Bovine pancreatic trypsin inhibitor domain^1-51^E:2.5e-18
gut	CAPTEDRAFT-18512	5.87e-09	1.54786	0.71	0.326	6.67e-05	GRP78_CHICK^GRP78_CHICK^Q:184-2058,H:22-643^84.96%ID^E:0^RecName: Full=78 kDa glucose-regulated protein;^Eukaryota; Metazoa; Chordata; Craniata; Vertebrata; Euteleostomi; Archelosauria; Archosauria; Dinosauria; Saurischia; Theropoda; Coelurosauria; Aves; Neognathae; Galloanserae; Galliformes; Phasianidae; Phasianinae; Gallus	PF00012.17^HSP70^Hsp70 protein^33-639^E:5.3e-265`PF06723.10^MreB_Mbl^MreB/Mbl protein^151-402^E:1.4e-18
gut	CAPTEDRAFT-166596	1.37e-10	1.47033	0.452	0.103	1.56e-06	STT3A_BOVIN^STT3A_BOVIN^Q:68-2155,H:7-702^83.33%ID^E:0^RecName: Full=Dolichyl-diphosphooligosaccharide--protein glycosyltransferase subunit STT3A;^Eukaryota; Metazoa; Chordata; Craniata; Vertebrata; Euteleostomi; Mammalia; Eutheria; Laurasiatheria; Cetartiodactyla; Ruminantia; Pecora; Bovidae; Bovinae; Bos	PF02516.11^STT3^Oligosaccharyl transferase STT3 subunit^23-490^E:4.4e-147
gut	CAPTEDRAFT-226803	2.48e-09	1.46813	0.355	0.072	2.82e-05	.	PF00235.16^Profilin^Profilin^74-202^E:9.2e-14
gut	CAPTEDRAFT-226558	4.36e-37	1.46561	0.323	0.009	4.95e-33	LRG2B_XENLA^LRG2B_XENLA^Q:703-1533,H:435-711^36.07%ID^E:2e-51^RecName: Full=Glycosyltransferase-like protein LARGE2-B;^Eukaryota; Metazoa; Chordata; Craniata; Vertebrata; Euteleostomi; Amphibia; Batrachia; Anura; Pipoidea; Pipidae; Xenopodinae; Xenopus; Xenopus	PF13896.3^Glyco_transf_49^Glycosyl-transferase for dystroglycan^180-242^E:6.6e-08`PF13896.3^Glyco_transf_49^Glycosyl-transferase for dystroglycan^243-416^E:1.9e-33
gut	CAPTEDRAFT-152623	2.96e-44	1.46035	0.29	0.004	3.37e-40	LARG2_MOUSE^LARG2_MOUSE^Q:258-1064,H:403-673^35.29%ID^E:5e-51^RecName: Full=Glycosyltransferase-like protein LARGE2;^Eukaryota; Metazoa; Chordata; Craniata; Vertebrata; Euteleostomi; Mammalia; Eutheria; Euarchontoglires; Glires; Rodentia; Sciurognathi; Muroidea; Muridae; Murinae; Mus; Mus	PF13896.3^Glyco_transf_49^Glycosyl-transferase for dystroglycan^92-309^E:2.6e-36
gut	CAPTEDRAFT-153310	1.2e-12	1.34862	0.484	0.1	1.36e-08	PDIA4_MOUSE^PDIA4_MOUSE^Q:155-1843,H:57-610^46.47%ID^E:1e-176^RecName: Full=Protein disulfide-isomerase A4;^Eukaryota; Metazoa; Chordata; Craniata; Vertebrata; Euteleostomi; Mammalia; Eutheria; Euarchontoglires; Glires; Rodentia; Sciurognathi; Muroidea; Muridae; Murinae; Mus; Mus	PF00085.17^Thioredoxin^Thioredoxin^44-146^E:1.6e-32`PF00085.17^Thioredoxin^Thioredoxin^159-262^E:6.1e-29`PF01216.14^Calsequestrin^Calsequestrin^195-376^E:2.6e-07`PF13848.3^Thioredoxin_6^Thioredoxin-like domain^294-491^E:2.6e-19`PF00085.17^Thioredoxin^Thioredoxin^515-610^E:3e-15
gut	CAPTEDRAFT-222830	2.04e-52	1.31386	0.452	0.012	2.31e-48	ALG13_MOUSE^ALG13_MOUSE^Q:169-459,H:446-542^48.98%ID^E:1e-18^RecName: Full=Putative bifunctional UDP-N-acetylglucosamine transferase and deubiquitinase ALG13;^Eukaryota; Metazoa; Chordata; Craniata; Vertebrata; Euteleostomi; Mammalia; Eutheria; Euarchontoglires; Glires; Rodentia; Sciurognathi; Muroidea; Muridae; Murinae; Mus; Mus	.
gut	CAPTEDRAFT-184488	7.58e-10	1.24823	0.355	0.067	8.62e-06	UXS1_MOUSE^UXS1_MOUSE^Q:103-1314,H:7-405^65.44%ID^E:2e-179^RecName: Full=UDP-glucuronic acid decarboxylase 1;^Eukaryota; Metazoa; Chordata; Craniata; Vertebrata; Euteleostomi; Mammalia; Eutheria; Euarchontoglires; Glires; Rodentia; Sciurognathi; Muroidea; Muridae; Murinae; Mus; Mus	PF04321.14^RmlD_sub_bind^RmlD substrate binding domain^103-349^E:2.9e-08`PF01370.18^Epimerase^NAD dependent epimerase/dehydratase family^104-328^E:4.9e-52`PF16363.2^GDP_Man_Dehyd^GDP-mannose 4,6 dehydratase^105-399^E:6.6e-53`PF01073.16^3Beta_HSD^3-beta hydroxysteroid dehydrogenase/isomerase family^105-320^E:1.5e-08`PF07993.9^NAD_binding_4^Male sterility protein^159-276^E:6.9e-06
gut	CAPTEDRAFT-159587	1.3e-05	1.24566	0.387	0.136	0.147987	ENPL_BOVIN^ENPL_BOVIN^Q:118-2313,H:19-755^67.84%ID^E:0^RecName: Full=Endoplasmin;^Eukaryota; Metazoa; Chordata; Craniata; Vertebrata; Euteleostomi; Mammalia; Eutheria; Laurasiatheria; Cetartiodactyla; Ruminantia; Pecora; Bovidae; Bovinae; Bos	PF02518.23^HATPase_c^Histidine kinase-, DNA gyrase B-, and HSP90-like ATPase^98-255^E:6.4e-14`PF13589.3^HATPase_c_3^Histidine kinase-, DNA gyrase B-, and HSP90-like ATPase^98-221^E:1.6e-10`PF00183.15^HSP90^Hsp90 protein^259-756^E:4.6e-223
gut	CAPTEDRAFT-156715	4.17e-07	1.20845	0.581	0.23	0.00474413	PDIA1_CHICK^PDIA1_CHICK^Q:81-1448,H:25-484^61.52%ID^E:0^RecName: Full=Protein disulfide-isomerase;^Eukaryota; Metazoa; Chordata; Craniata; Vertebrata; Euteleostomi; Archelosauria; Archosauria; Dinosauria; Saurischia; Theropoda; Coelurosauria; Aves; Neognathae; Galloanserae; Galliformes; Phasianidae; Phasianinae; Gallus	PF00085.17^Thioredoxin^Thioredoxin^26-128^E:3.5e-31`PF13848.3^Thioredoxin_6^Thioredoxin-like domain^158-342^E:1.8e-38`PF00085.17^Thioredoxin^Thioredoxin^366-467^E:1.9e-28
gut	CAPTEDRAFT-218729	2.27e-57	1.20443	0.258	0	2.58e-53	.	PF01275.16^Myelin_PLP^Myelin proteolipid protein (PLP or lipophilin)^2-121^E:4.3e-07`PF01442.15^Apolipoprotein^Apolipoprotein A1/A4/E domain^227-263^E:26`PF01442.15^Apolipoprotein^Apolipoprotein A1/A4/E domain^365-472^E:0.24`PF01442.15^Apolipoprotein^Apolipoprotein A1/A4/E domain^469-655^E:8.2e-10`PF01442.15^Apolipoprotein^Apolipoprotein A1/A4/E domain^591-699^E:31`PF01442.15^Apolipoprotein^Apoli…
gut	CAPTEDRAFT-151610	2.65e-07	1.20077	0.258	0.049	0.00301056	TXND5_HUMAN^TXND5_HUMAN^Q:46-1137,H:66-432^45.31%ID^E:4e-106^RecName: Full=Thioredoxin domain-containing protein 5;^Eukaryota; Metazoa; Chordata; Craniata; Vertebrata; Euteleostomi; Mammalia; Eutheria; Euarchontoglires; Primates; Haplorrhini; Catarrhini; Hominidae; Homo`TXND5_HUMAN^TXND5_HUMAN^Q:412-1119,H:65-293^42.68%ID^E:9e-59^RecName: Full=Thioredoxin domain-containing protein 5;^Eukaryota; M…	PF13098.3^Thioredoxin_2^Thioredoxin-like domain^2-71^E:1.1e-06`PF00085.17^Thioredoxin^Thioredoxin^3-89^E:6e-24`PF00085.17^Thioredoxin^Thioredoxin^109-206^E:6.6e-27`PF00085.17^Thioredoxin^Thioredoxin^244-345^E:3.6e-31
gut	CAPTEDRAFT-229374	1.41e-41	1.19108	0.258	0.003	1.6e-37	UST_MOUSE^UST_MOUSE^Q:223-1005,H:93-357^32.97%ID^E:3e-34^RecName: Full=Uronyl 2-sulfotransferase;^Eukaryota; Metazoa; Chordata; Craniata; Vertebrata; Euteleostomi; Mammalia; Eutheria; Euarchontoglires; Glires; Rodentia; Sciurognathi; Muroidea; Muridae; Murinae; Mus; Mus	PF03567.11^Sulfotransfer_2^Sulfotransferase family^86-329^E:2.3e-16
gut	CAPTEDRAFT-181179	8.35e-11	1.17265	0.258	0.033	9.49e-07	IMPA3_DANRE^IMPA3_DANRE^Q:19-990,H:6-330^45.86%ID^E:1e-70^RecName: Full=Inositol monophosphatase 3;^Eukaryota; Metazoa; Chordata; Craniata; Vertebrata; Euteleostomi; Actinopterygii; Neopterygii; Teleostei; Ostariophysi; Cypriniformes; Cyprinidae; Danio	PF00459.22^Inositol_P^Inositol monophosphatase family^47-309^E:2.3e-40
gut	CAPTEDRAFT-222278	2.11e-05	1.1157	0.387	0.136	0.239496	PDIA6_RAT^PDIA6_RAT^Q:158-1363,H:24-420^60.84%ID^E:3e-178^RecName: Full=Protein disulfide-isomerase A6;^Eukaryota; Metazoa; Chordata; Craniata; Vertebrata; Euteleostomi; Mammalia; Eutheria; Euarchontoglires; Glires; Rodentia; Sciurognathi; Muroidea; Muridae; Murinae; Rattus	PF00085.17^Thioredoxin^Thioredoxin^25-124^E:1.5e-29`PF00085.17^Thioredoxin^Thioredoxin^166-267^E:3.8e-29
gut	CAPTEDRAFT-153442	1.3e-12	1.07692	0.29	0.034	1.48e-08	UGDH_DROME^UGDH_DROME^Q:79-1482,H:2-469^70.51%ID^E:0^RecName: Full=UDP-glucose 6-dehydrogenase;^Eukaryota; Metazoa; Ecdysozoa; Arthropoda; Hexapoda; Insecta; Pterygota; Neoptera; Endopterygota; Diptera; Brachycera; Muscomorpha; Ephydroidea; Drosophilidae; Drosophila; Sophophora	PF03721.11^UDPG_MGDP_dh_N^UDP-glucose/GDP-mannose dehydrogenase family, NAD binding domain^5-187^E:5.1e-64`PF00984.16^UDPG_MGDP_dh^UDP-glucose/GDP-mannose dehydrogenase family, central domain^213-307^E:6.7e-31`PF03720.12^UDPG_MGDP_dh_C^UDP-glucose/GDP-mannose dehydrogenase family, UDP binding domain^332-446^E:7.8e-35
gut	CAPTEDRAFT-223508	1.11e-25	1.07498	0.29	0.013	1.27e-21	UST_MOUSE^UST_MOUSE^Q:511-1377,H:104-375^30.1%ID^E:1e-34^RecName: Full=Uronyl 2-sulfotransferase;^Eukaryota; Metazoa; Chordata; Craniata; Vertebrata; Euteleostomi; Mammalia; Eutheria; Euarchontoglires; Glires; Rodentia; Sciurognathi; Muroidea; Muridae; Murinae; Mus; Mus	PF03567.11^Sulfotransfer_2^Sulfotransferase family^92-361^E:2.3e-17
gut	CAPTEDRAFT-170177	0.000275157	1.00825	0.774	0.62	1	HBF1_URECA^HBF1_URECA^Q:100-447,H:4-119^35.34%ID^E:2e-15^RecName: Full=Hemoglobin F-I;^Eukaryota; Metazoa; Lophotrochozoa; Annelida; Polychaeta; Echiura; Xenopneusta; Urechidae; Urechis	PF00042.19^Globin^Globin^7-107^E:4e-13
gut	CAPTEDRAFT-164457	2.29e-33	1.00593	0.29	0.008	2.6e-29	CALM4_MOUSE^CALM4_MOUSE^Q:8-436,H:1-142^34.27%ID^E:5e-23^RecName: Full=Calmodulin-4;^Eukaryota; Metazoa; Chordata; Craniata; Vertebrata; Euteleostomi; Mammalia; Eutheria; Euarchontoglires; Glires; Rodentia; Sciurognathi; Muroidea; Muridae; Murinae; Mus; Mus	PF00036.29^EF-hand_1^EF hand^9-35^E:6.4e-07`PF13405.3^EF-hand_6^EF-hand domain^9-35^E:5.1e-05`PF13499.3^EF-hand_7^EF-hand domain pair^11-69^E:2.9e-11`PF13202.3^EF-hand_5^EF hand^12-32^E:0.0062`PF13833.3^EF-hand_8^EF-hand domain pair^13-35^E:0.01`PF13833.3^EF-hand_8^EF-hand domain pair^37-69^E:8.7e-05`PF00036.29^EF-hand_1^EF hand^44-71^E:4.3e-06`PF13202.3^EF-hand_5^EF hand^46-66^E:0.0002`PF13833.3…
gut	CAPTEDRAFT-225110	0.0266116	0.955263	0.258	0.139	1	MIA_MOUSE^MIA_MOUSE^Q:64-276,H:29-107^40.51%ID^E:5e-11^RecName: Full=Melanoma-derived growth regulatory protein;^Eukaryota; Metazoa; Chordata; Craniata; Vertebrata; Euteleostomi; Mammalia; Eutheria; Euarchontoglires; Glires; Rodentia; Sciurognathi; Muroidea; Muridae; Murinae; Mus; Mus	PF07653.14^SH3_2^Variant SH3 domain^41-94^E:6.3e-07
gut	CAPTEDRAFT-157303	0.000748692	0.950853	0.452	0.22	1	VIGLN_HUMAN^VIGLN_HUMAN^Q:171-3809,H:32-1230^56.04%ID^E:0^RecName: Full=Vigilin;^Eukaryota; Metazoa; Chordata; Craniata; Vertebrata; Euteleostomi; Mammalia; Eutheria; Euarchontoglires; Primates; Haplorrhini; Catarrhini; Hominidae; Homo	PF00013.26^KH_1^KH domain^155-214^E:1.2e-11`PF00013.26^KH_1^KH domain^226-286^E:3.1e-06`PF00013.26^KH_1^KH domain^298-359^E:4.1e-08`PF00013.26^KH_1^KH domain^370-426^E:1.6e-10`PF00013.26^KH_1^KH domain^440-500^E:8.1e-13`PF00013.26^KH_1^KH domain^512-572^E:7.4e-10`PF00013.26^KH_1^KH domain^586-646^E:5.3e-15`PF00013.26^KH_1^KH domain^657-718^E:5.3e-13`PF00013.26^KH_1^KH domain^730-792^E:1.3e-13`PF0…
gut	CAPTEDRAFT-20984	1.31e-06	0.927352	0.677	0.318	0.0148866	YQA3_THEAQ^YQA3_THEAQ^Q:141-527,H:3-122^32.56%ID^E:3e-06^RecName: Full=Universal stress protein in QAH/OAS sulfhydrylase 3'region;^Bacteria; Deinococcus-Thermus; Deinococci; Thermales; Thermaceae; Thermus	PF00582.23^Usp^Universal stress protein family^8-151^E:7.1e-34
gut	CAPTEDRAFT-221933	0.00329072	0.917137	0.258	0.108	1	SEC62_HUMAN^SEC62_HUMAN^Q:544-870,H:176-284^66.06%ID^E:2e-36^RecName: Full=Translocation protein SEC62;^Eukaryota; Metazoa; Chordata; Craniata; Vertebrata; Euteleostomi; Mammalia; Eutheria; Euarchontoglires; Primates; Haplorrhini; Catarrhini; Hominidae; Homo`SEC62_HUMAN^SEC62_HUMAN^Q:4-276,H:4-94^56.04%ID^E:6e-19^RecName: Full=Translocation protein SEC62;^Eukaryota; Metazoa; Chordata; Craniata; V…	PF03839.13^Sec62^Translocation protein Sec62^49-271^E:1.7e-68
gut	CAPTEDRAFT-159283	0.0102486	0.907691	0.355	0.2	1	RPN1_MACFA^RPN1_MACFA^Q:161-1882,H:31-607^53.2%ID^E:0^RecName: Full=Dolichyl-diphosphooligosaccharide--protein glycosyltransferase subunit 1;^Eukaryota; Metazoa; Chordata; Craniata; Vertebrata; Euteleostomi; Mammalia; Eutheria; Euarchontoglires; Primates; Haplorrhini; Catarrhini; Cercopithecidae; Cercopithecinae; Macaca	PF04597.11^Ribophorin_I^Ribophorin I^31-451^E:1.5e-145`PF14966.3^DNA_repr_REX1B^DNA repair REX1-B^473-549^E:2.4e-05
gut	CAPTEDRAFT-217663	8.11e-08	0.864463	0.387	0.098	0.00092199	MACF1_HUMAN^MACF1_HUMAN^Q:28240-37908,H:3798-6998^31.53%ID^E:0^RecName: Full=Microtubule-actin cross-linking factor 1, isoforms 1/2/3/5;^Eukaryota; Metazoa; Chordata; Craniata; Vertebrata; Euteleostomi; Mammalia; Eutheria; Euarchontoglires; Primates; Haplorrhini; Catarrhini; Hominidae; Homo`MACF1_HUMAN^MACF1_HUMAN^Q:265-3813,H:181-1388^28.97%ID^E:2e-123^RecName: Full=Microtubule-actin cross-linki…	PF00307.28^CH^Calponin homology (CH) domain^102-206^E:3e-23`PF11971.5^CAMSAP_CH^CAMSAP CH domain^120-183^E:0.00011`PF00435.18^Spectrin^Spectrin repeat^574-671^E:7.7e-06`PF00435.18^Spectrin^Spectrin repeat^934-1025^E:6.4e-06`PF00681.17^Plectin^Plectin repeat^1451-1483^E:0.00026`PF00681.17^Plectin^Plectin repeat^1856-1887^E:0.00025`PF00681.17^Plectin^Plectin repeat^3469-3493^E:3.2e-05`PF00681.17^Pl…
gut	CAPTEDRAFT-173651	3.11e-08	0.836572	0.355	0.076	0.000353777	GLU2B_MOUSE^GLU2B_MOUSE^Q:55-855,H:15-281^49.44%ID^E:4e-71^RecName: Full=Glucosidase 2 subunit beta;^Eukaryota; Metazoa; Chordata; Craniata; Vertebrata; Euteleostomi; Mammalia; Eutheria; Euarchontoglires; Glires; Rodentia; Sciurognathi; Muroidea; Muridae; Murinae; Mus; Mus`GLU2B_MOUSE^GLU2B_MOUSE^Q:1057-1500,H:348-495^45.27%ID^E:6e-41^RecName: Full=Glucosidase 2 subunit beta;^Eukaryota; Metazoa; …	PF12999.4^PRKCSH-like^Glucosidase II beta subunit-like^8-168^E:1.3e-43`PF13015.3^PRKCSH_1^Glucosidase II beta subunit-like protein^373-511^E:2.4e-23`PF07915.10^PRKCSH^Glucosidase II beta subunit-like protein^411-469^E:1.4e-08
gut	CAPTEDRAFT-151740	2.11e-05	0.833869	0.742	0.46	0.239543	ARF1_XENLA^ARF1_XENLA^Q:141-683,H:1-181^95.58%ID^E:2e-122^RecName: Full=ADP-ribosylation factor 1;^Eukaryota; Metazoa; Chordata; Craniata; Vertebrata; Euteleostomi; Amphibia; Batrachia; Anura; Pipoidea; Pipidae; Xenopodinae; Xenopus; Xenopus	PF00025.18^Arf^ADP-ribosylation factor family^6-176^E:1.1e-79`PF09439.7^SRPRB^Signal recognition particle receptor beta subunit^16-143^E:1.2e-14`PF08477.10^Roc^Ras of Complex, Roc, domain of DAPkinase^19-129^E:6.8e-14`PF04670.9^Gtr1_RagA^Gtr1/RagA G protein conserved region^19-142^E:1.1e-10`PF01926.20^MMR_HSR1^50S ribosome-binding GTPase^19-123^E:1.6e-05`PF00071.19^Ras^Ras family^20-147^E:1.3e-12
gut	CAPTEDRAFT-223373	9.75e-07	0.829058	0.258	0.052	0.0110818	CR3L2_DANRE^CR3L2_DANRE^Q:1008-1634,H:258-437^50.48%ID^E:2e-40^RecName: Full=Cyclic AMP-responsive element-binding protein 3-like protein 2;^Eukaryota; Metazoa; Chordata; Craniata; Vertebrata; Euteleostomi; Actinopterygii; Neopterygii; Teleostei; Ostariophysi; Cypriniformes; Cyprinidae; Danio	PF03131.14^bZIP_Maf^bZIP Maf transcription factor^328-398^E:5.6e-07`PF00170.18^bZIP_1^bZIP transcription factor^333-395^E:3.6e-16`PF07716.12^bZIP_2^Basic region leucine zipper^336-386^E:3.1e-07
S-phase markers	CAPTEDRAFT-148720						CDC6_HUMAN^CDC6_HUMAN^Q:73-1332,H:134-559^48.83%ID^E:2e-132^RecName: Full=Cell division control protein 6 homolog;^Eukaryota; Metazoa; Chordata; Craniata; Vertebrata; Euteleostomi; Mammalia; Eutheria; Euarchontoglires; Primates; Haplorrhini; Catarrhini; Hominidae; Homo	PF13191.3^AAA_16^AAA ATPase domain^39-174^E:1.1e-12`PF13401.3^AAA_22^AAA domain^63-184^E:3.3e-14`PF00158.23^Sigma54_activat^Sigma-54 interaction domain^63-168^E:7.1e-05`PF00004.26^AAA^ATPase family associated with various cellular activities (AAA)^67-195^E:1.7e-13`PF07728.11^AAA_5^AAA domain (dynein-related subfamily)^68-168^E:0.00011`PF09079.8^Cdc6_C^CDC6, C terminal winged helix domain^330-405^…
S-phase markers	CAPTEDRAFT-164893						CKS1_PATVU^CKS1_PATVU^Q:66-287,H:1-74^82.43%ID^E:3e-37^RecName: Full=Cyclin-dependent kinases regulatory subunit;^Eukaryota; Metazoa; Lophotrochozoa; Mollusca; Gastropoda; Patellogastropoda; Patelloidea; Patellidae; Patella	PF01111.16^CKS^Cyclin-dependent kinase regulatory subunit^8-73^E:4.8e-37
S-phase markers	CAPTEDRAFT-218765						MCM3_CHICK^MCM3_CHICK^Q:19-2451,H:10-812^65.77%ID^E:0^RecName: Full=DNA replication licensing factor MCM3;^Eukaryota; Metazoa; Chordata; Craniata; Vertebrata; Euteleostomi; Archelosauria; Archosauria; Dinosauria; Saurischia; Theropoda; Coelurosauria; Aves; Neognathae; Galloanserae; Galliformes; Phasianidae; Phasianinae; Gallus	PF14551.3^MCM_N^MCM N-terminal domain^15-127^E:5.5e-14`PF00493.20^MCM^MCM2/3/5 family^279-650^E:5.6e-127`PF01078.18^Mg_chelatase^Magnesium chelatase, subunit ChlI^386-453^E:9.6e-07
S-phase markers	CAPTEDRAFT-159337						MCM7_XENTR^MCM7_XENTR^Q:18-2174,H:2-718^76.39%ID^E:0^RecName: Full=DNA replication licensing factor mcm7;^Eukaryota; Metazoa; Chordata; Craniata; Vertebrata; Euteleostomi; Amphibia; Batrachia; Anura; Pipoidea; Pipidae; Xenopodinae; Xenopus; Silurana	PF14551.3^MCM_N^MCM N-terminal domain^11-168^E:5.6e-27`PF00493.20^MCM^MCM2/3/5 family^324-643^E:8.1e-134`PF07728.11^AAA_5^AAA domain (dynein-related subfamily)^379-505^E:1.5e-07`PF01078.18^Mg_chelatase^Magnesium chelatase, subunit ChlI^428-496^E:4.1e-05
S-phase markers	CAPTEDRAFT-218725						RFA2A_XENLA^RFA2A_XENLA^Q:61-780,H:40-275^42.08%ID^E:1e-53^RecName: Full=Replication protein A 32 kDa subunit-A;^Eukaryota; Metazoa; Chordata; Craniata; Vertebrata; Euteleostomi; Amphibia; Batrachia; Anura; Pipoidea; Pipidae; Xenopodinae; Xenopus; Xenopus	PF08784.8^RPA_C^Replication protein A C terminal^152-253^E:1.9e-19
S-phase markers	CAPTEDRAFT-228337						DPOLA_XENLA^DPOLA_XENLA^Q:55-4269,H:6-1454^51.76%ID^E:0^RecName: Full=DNA polymerase alpha catalytic subunit;^Eukaryota; Metazoa; Chordata; Craniata; Vertebrata; Euteleostomi; Amphibia; Batrachia; Anura; Pipoidea; Pipidae; Xenopodinae; Xenopus; Xenopus	PF12254.5^DNA_pol_alpha_N^DNA polymerase alpha subunit p180 N terminal^39-101^E:8.2e-20`PF03104.16^DNA_pol_B_exo1^DNA polymerase family B, exonuclease domain^391-700^E:2e-38`PF00136.18^DNA_pol_B^DNA polymerase family B^759-1216^E:4.6e-132`PF08996.7^zf-DNA_Pol^DNA Polymerase alpha zinc finger^1253-1420^E:6.1e-33
S-phase markers	CAPTEDRAFT-226192						WEE1_RAT^WEE1_RAT^Q:452-1867,H:163-642^49.6%ID^E:6e-136^RecName: Full=Wee1-like protein kinase;^Eukaryota; Metazoa; Chordata; Craniata; Vertebrata; Euteleostomi; Mammalia; Eutheria; Euarchontoglires; Glires; Rodentia; Sciurognathi; Muroidea; Muridae; Murinae; Rattus	PF00069.22^Pkinase^Protein kinase domain^241-526^E:7.7e-42`PF07714.14^Pkinase_Tyr^Protein tyrosine kinase^245-525^E:4.1e-15
S-phase markers	CAPTEDRAFT-163584						PIWL1_MOUSE^PIWL1_MOUSE^Q:22-1578,H:346-858^42.69%ID^E:3e-150^RecName: Full=Piwi-like protein 1;^Eukaryota; Metazoa; Chordata; Craniata; Vertebrata; Euteleostomi; Mammalia; Eutheria; Euarchontoglires; Glires; Rodentia; Sciurognathi; Muroidea; Muridae; Murinae; Mus; Mus	PF02170.19^PAZ^PAZ domain^7-75^E:1.6e-08`PF02171.14^Piwi^Piwi domain^222-512^E:1.7e-86
S-phase markers	CAPTEDRAFT-156286						PO2F1_PIG^PO2F1_PIG^Q:290-775,H:273-440^73.84%ID^E:3e-77^RecName: Full=POU domain, class 2, transcription factor 1;^Eukaryota; Metazoa; Chordata; Craniata; Vertebrata; Euteleostomi; Mammalia; Eutheria; Laurasiatheria; Cetartiodactyla; Suina; Suidae; Sus	PF00157.14^Pou^Pou domain - N-terminal to homeobox domain^96-166^E:4e-37`PF00046.26^Homeobox^Homeobox domain^189-245^E:1e-16
S-phase markers	CAPTEDRAFT-224167						BUB1B_HUMAN^BUB1B_HUMAN^Q:13-1254,H:13-420^38.33%ID^E:1e-70^RecName: Full=Mitotic checkpoint serine/threonine-protein kinase BUB1 beta;^Eukaryota; Metazoa; Chordata; Craniata; Vertebrata; Euteleostomi; Mammalia; Eutheria; Euarchontoglires; Primates; Haplorrhini; Catarrhini; Hominidae; Homo`BUB1B_HUMAN^BUB1B_HUMAN^Q:2632-3504,H:749-1003^22.3%ID^E:1e-10^RecName: Full=Mitotic checkpoint serine/threo…	PF08311.9^Mad3_BUB1_I^Mad3/BUB1 homology region 1^50-171^E:4.1e-44`PF00069.22^Pkinase^Protein kinase domain^898-1130^E:3.2e-08
neural	CAPTEDRAFT-20216	9.92e-64	1.74257	0.387	0.004	1.13e-59	SOX2_XENTR^SOX2_XENTR^Q:578-1003,H:34-188^68.59%ID^E:5e-56^RecName: Full=Transcription factor Sox-2 {ECO:0000250|UniProtKB:O42569};^Eukaryota; Metazoa; Chordata; Craniata; Vertebrata; Euteleostomi; Amphibia; Batrachia; Anura; Pipoidea; Pipidae; Xenopodinae; Xenopus; Silurana	PF09011.7^HMG_box_2^HMG-box domain^112-182^E:1.8e-11`PF00505.16^HMG_box^HMG (high mobility group) box^115-183^E:3e-27`PF12336.5^SOXp^SOX transcription factor^184-255^E:8.3e-09
neural	CAPTEDRAFT-182172	2.92e-61	1.64023	0.355	0.003	3.32e-57	ASH2_DROME^ASH2_DROME^Q:15-1523,H:37-549^51.46%ID^E:1e-169^RecName: Full=Set1/Ash2 histone methyltransferase complex subunit ASH2 {ECO:0000303|PubMed:21694722};^Eukaryota; Metazoa; Ecdysozoa; Arthropoda; Hexapoda; Insecta; Pterygota; Neoptera; Endopterygota; Diptera; Brachycera; Muscomorpha; Ephydroidea; Drosophilidae; Drosophila; Sophophora	PF00622.25^SPRY^SPRY domain^288-360^E:9.1e-05`PF00622.25^SPRY^SPRY domain^406-446^E:4.2e-06
neural	CAPTEDRAFT-219186	2.27e-57	1.20443	0.258	0	2.58e-53	NOTCH_DROME^NOTCH_DROME^Q:46-6423,H:52-2157^50.37%ID^E:0^RecName: Full=Neurogenic locus Notch protein;^Eukaryota; Metazoa; Ecdysozoa; Arthropoda; Hexapoda; Insecta; Pterygota; Neoptera; Endopterygota; Diptera; Brachycera; Muscomorpha; Ephydroidea; Drosophilidae; Drosophila; Sophophora`NOTCH_DROME^NOTCH_DROME^Q:40-3786,H:209-1452^37.99%ID^E:0^RecName: Full=Neurogenic locus Notch protein;^Eukaryota…	PF00008.24^EGF^EGF-like domain^115-146^E:1.4e-05`PF00008.24^EGF^EGF-like domain^154-183^E:7e-06`PF07645.12^EGF_CA^Calcium-binding EGF domain^188-224^E:2.6e-08`PF12661.4^hEGF^Human growth factor-like EGF^214-225^E:0.013`PF00008.24^EGF^EGF-like domain^232-262^E:1.9e-06`PF00008.24^EGF^EGF-like domain^271-301^E:0.00012`PF07645.12^EGF_CA^Calcium-binding EGF domain^305-338^E:7.7e-08`PF00008.24^EGF^EGF-…
neural	CAPTEDRAFT-184404	2.04e-52	1.31386	0.452	0.012	2.31e-48	NGN2_MOUSE^NGN2_MOUSE^Q:1-249,H:87-172^67.44%ID^E:9e-32^RecName: Full=Neurogenin-2;^Eukaryota; Metazoa; Chordata; Craniata; Vertebrata; Euteleostomi; Mammalia; Eutheria; Euarchontoglires; Glires; Rodentia; Sciurognathi; Muroidea; Muridae; Murinae; Mus; Mus	PF00010.23^HLH^Helix-loop-helix DNA-binding domain^24-73^E:2e-15
neural	CAPTEDRAFT-176480	4.02e-48	1.94968	0.548	0.025	4.57e-44	ASH1L_MOUSE^ASH1L_MOUSE^Q:205-2631,H:1984-2822^50.06%ID^E:0^RecName: Full=Histone-lysine N-methyltransferase ASH1L;^Eukaryota; Metazoa; Chordata; Craniata; Vertebrata; Euteleostomi; Mammalia; Eutheria; Euarchontoglires; Glires; Rodentia; Sciurognathi; Muroidea; Muridae; Murinae; Mus; Mus	PF00856.25^SET^SET domain^232-337^E:1.9e-17`PF00439.22^Bromodomain^Bromodomain^508-574^E:3.6e-14`PF01426.15^BAH^BAH domain^714-840^E:8.1e-18
neural	CAPTEDRAFT-225285	2.96e-44	1.46035	0.29	0.004	3.37e-40	HES4A_XENLA^HES4A_XENLA^Q:142-327,H:54-125^43.06%ID^E:2e-11^RecName: Full=Transcription factor HES-4-A;^Eukaryota; Metazoa; Chordata; Craniata; Vertebrata; Euteleostomi; Amphibia; Batrachia; Anura; Pipoidea; Pipidae; Xenopodinae; Xenopus; Xenopus	PF00010.23^HLH^Helix-loop-helix DNA-binding domain^17-70^E:1.7e-12`PF07527.10^Hairy_orange^Hairy Orange^81-132^E:2.7e-07
neural	CAPTEDRAFT-172701	1.41e-41	1.19108	0.258	0.003	1.6e-37	ELAV4_HUMAN^ELAV4_HUMAN^Q:73-1071,H:43-376^58.97%ID^E:1e-129^RecName: Full=ELAV-like protein 4;^Eukaryota; Metazoa; Chordata; Craniata; Vertebrata; Euteleostomi; Mammalia; Eutheria; Euarchontoglires; Primates; Haplorrhini; Catarrhini; Hominidae; Homo	PF00076.19^RRM_1^RNA recognition motif. (a.k.a. RRM, RBD, or RNP domain)^30-100^E:5.3e-22`PF13893.3^RRM_5^RNA recognition motif. (a.k.a. RRM, RBD, or RNP domain)^31-104^E:0.023`PF00076.19^RRM_1^RNA recognition motif. (a.k.a. RRM, RBD, or RNP domain)^116-182^E:1.1e-17`PF00076.19^RRM_1^RNA recognition motif. (a.k.a. RRM, RBD, or RNP domain)^280-349^E:2.3e-19`PF13893.3^RRM_5^RNA recognition motif. (…
neural	CAPTEDRAFT-180669	4.36e-37	1.46561	0.323	0.009	4.95e-33	MSI2H_MOUSE^MSI2H_MOUSE^Q:84-761,H:14-243^70.21%ID^E:1e-106^RecName: Full=RNA-binding protein Musashi homolog 2;^Eukaryota; Metazoa; Chordata; Craniata; Vertebrata; Euteleostomi; Mammalia; Eutheria; Euarchontoglires; Glires; Rodentia; Sciurognathi; Muroidea; Muridae; Murinae; Mus; Mus	PF00076.19^RRM_1^RNA recognition motif. (a.k.a. RRM, RBD, or RNP domain)^27-94^E:9.4e-17`PF00076.19^RRM_1^RNA recognition motif. (a.k.a. RRM, RBD, or RNP domain)^119-185^E:3.2e-16
neural	CAPTEDRAFT-169232	2.29e-33	1.00593	0.29	0.008	2.6e-29	NDF1_HUMAN^NDF1_HUMAN^Q:409-789,H:101-222^58.59%ID^E:2e-38^RecName: Full=Neurogenic differentiation factor 1;^Eukaryota; Metazoa; Chordata; Craniata; Vertebrata; Euteleostomi; Mammalia; Eutheria; Euarchontoglires; Primates; Haplorrhini; Catarrhini; Hominidae; Homo	PF00010.23^HLH^Helix-loop-helix DNA-binding domain^102-153^E:1.1e-15`PF12533.5^Neuro_bHLH^Neuronal helix-loop-helix transcription factor^160-268^E:1.4e-15
neural	CAPTEDRAFT-182721	1.11e-25	1.07498	0.29	0.013	1.27e-21	MKNK1_MOUSE^MKNK1_MOUSE^Q:282-1304,H:36-374^56.01%ID^E:3e-119^RecName: Full=MAP kinase-interacting serine/threonine-protein kinase 1;^Eukaryota; Metazoa; Chordata; Craniata; Vertebrata; Euteleostomi; Mammalia; Eutheria; Euarchontoglires; Glires; Rodentia; Sciurognathi; Muroidea; Muridae; Murinae; Mus; Mus	PF00069.22^Pkinase^Protein kinase domain^73-356^E:3.2e-69`PF07714.14^Pkinase_Tyr^Protein tyrosine kinase^73-285^E:5e-32`PF06293.11^Kdo^Lipopolysaccharide kinase (Kdo/WaaP) family^142-215^E:7.8e-05
neural	CAPTEDRAFT-170504	1.2e-12	1.34862	0.484	0.1	1.36e-08	FOSL1_RAT^FOSL1_RAT^Q:779-1018,H:117-196^48.75%ID^E:3e-15^RecName: Full=Fos-related antigen 1;^Eukaryota; Metazoa; Chordata; Craniata; Vertebrata; Euteleostomi; Mammalia; Eutheria; Euarchontoglires; Glires; Rodentia; Sciurognathi; Muroidea; Muridae; Murinae; Rattus	PF03131.14^bZIP_Maf^bZIP Maf transcription factor^184-248^E:0.00038
neural	CAPTEDRAFT-184448	1.3e-12	1.07692	0.29	0.034	1.48e-08	MAFB_COTJA^MAFB_COTJA^Q:686-952,H:201-289^52.81%ID^E:7e-16^RecName: Full=Transcription factor MafB;^Eukaryota; Metazoa; Chordata; Craniata; Vertebrata; Euteleostomi; Archelosauria; Archosauria; Dinosauria; Saurischia; Theropoda; Coelurosauria; Aves; Neognathae; Galloanserae; Galliformes; Phasianidae; Perdicinae; Coturnix	PF03131.14^bZIP_Maf^bZIP Maf transcription factor^155-244^E:5.8e-26
neural	CAPTEDRAFT-174693	8.35e-11	1.17265	0.258	0.033	9.49e-07	KINH_DORPE^KINH_DORPE^Q:1-1116,H:584-953^67.11%ID^E:6e-155^RecName: Full=Kinesin heavy chain;^Eukaryota; Metazoa; Lophotrochozoa; Mollusca; Cephalopoda; Coleoidea; Neocoleoidea; Decapodiformes; Teuthida; Myopsina; Loliginidae; Doryteuthis	.
neural	CAPTEDRAFT-155585	1.37e-10	1.47033	0.452	0.103	1.56e-06	HSP74_ANOAL^HSP74_ANOAL^Q:92-1870,H:3-640^67.61%ID^E:0^RecName: Full=Heat shock protein 70 B2;^Eukaryota; Metazoa; Ecdysozoa; Arthropoda; Hexapoda; Insecta; Pterygota; Neoptera; Endopterygota; Diptera; Nematocera; Culicoidea; Culicidae; Anophelinae; Anopheles	PF00012.17^HSP70^Hsp70 protein^8-66^E:2.6e-24`PF06723.10^MreB_Mbl^MreB/Mbl protein^8-348^E:1.2e-16`PF00012.17^HSP70^Hsp70 protein^68-580^E:3.5e-213
neural	CAPTEDRAFT-151928	7.58e-10	1.24823	0.355	0.067	8.62e-06	ZFN2B_MOUSE^ZFN2B_MOUSE^Q:85-852,H:1-238^44.14%ID^E:7e-63^RecName: Full=AN1-type zinc finger protein 2B;^Eukaryota; Metazoa; Chordata; Craniata; Vertebrata; Euteleostomi; Mammalia; Eutheria; Euarchontoglires; Glires; Rodentia; Sciurognathi; Muroidea; Muridae; Murinae; Mus; Mus	PF01428.13^zf-AN1^AN1-like Zinc finger^10-48^E:1.8e-12`PF01428.13^zf-AN1^AN1-like Zinc finger^100-136^E:6.1e-12`PF02809.17^UIM^Ubiquitin interaction motif^207-219^E:0.041`PF02809.17^UIM^Ubiquitin interaction motif^242-256^E:190
neural	CAPTEDRAFT-20740	2.48e-09	1.46813	0.355	0.072	2.82e-05	OPRM_MACFA^OPRM_MACFA^Q:592-1398,H:84-350^23.64%ID^E:2e-07^RecName: Full=Mu-type opioid receptor;^Eukaryota; Metazoa; Chordata; Craniata; Vertebrata; Euteleostomi; Mammalia; Eutheria; Euarchontoglires; Primates; Haplorrhini; Catarrhini; Cercopithecidae; Cercopithecinae; Macaca	PF10324.6^7TM_GPCR_Srw^Serpentine type 7TM GPCR chemoreceptor Srw^197-460^E:2.3e-07`PF00001.18^7tm_1^7 transmembrane receptor (rhodopsin family)^201-454^E:4.7e-14
neural	CAPTEDRAFT-226906	5.87e-09	1.54786	0.71	0.326	6.67e-05	ENOPH_BRAFL^ENOPH_BRAFL^Q:358-873,H:122-297^47.16%ID^E:2e-58^RecName: Full=Enolase-phosphatase E1 {ECO:0000255|HAMAP-Rule:MF_03117};^Eukaryota; Metazoa; Chordata; Cephalochordata; Branchiostomidae; Branchiostoma`ENOPH_BRAFL^ENOPH_BRAFL^Q:68-337,H:17-107^46.24%ID^E:2e-58^RecName: Full=Enolase-phosphatase E1 {ECO:0000255|HAMAP-Rule:MF_03117};^Eukaryota; Metazoa; Chordata; Cephalochordata; Branchios…	.
neural	CAPTEDRAFT-223281	3.11e-08	0.836572	0.355	0.076	0.000353777	PO6F2_HUMAN^PO6F2_HUMAN^Q:1132-1659,H:461-670^66.51%ID^E:4e-85^RecName: Full=POU domain, class 6, transcription factor 2;^Eukaryota; Metazoa; Chordata; Craniata; Vertebrata; Euteleostomi; Mammalia; Eutheria; Euarchontoglires; Primates; Haplorrhini; Catarrhini; Hominidae; Homo	PF00157.14^Pou^Pou domain - N-terminal to homeobox domain^399-469^E:2.5e-28`PF00046.26^Homeobox^Homeobox domain^491-546^E:4e-16
neural	CAPTEDRAFT-169706	8.11e-08	0.864463	0.387	0.098	0.00092199	ELAV2_XENTR^ELAV2_XENTR^Q:365-1336,H:65-371^47.88%ID^E:1e-85^RecName: Full=ELAV-like protein 2;^Eukaryota; Metazoa; Chordata; Craniata; Vertebrata; Euteleostomi; Amphibia; Batrachia; Anura; Pipoidea; Pipidae; Xenopodinae; Xenopus; Silurana`ELAV2_XENTR^ELAV2_XENTR^Q:251-820,H:118-356^20.9%ID^E:7e-10^RecName: Full=ELAV-like protein 2;^Eukaryota; Metazoa; Chordata; Craniata; Vertebrata; Euteleostomi…	PF00076.19^RRM_1^RNA recognition motif. (a.k.a. RRM, RBD, or RNP domain)^63-133^E:1.1e-16`PF00076.19^RRM_1^RNA recognition motif. (a.k.a. RRM, RBD, or RNP domain)^148-214^E:1.5e-17`PF13893.3^RRM_5^RNA recognition motif. (a.k.a. RRM, RBD, or RNP domain)^303-378^E:1.7e-05`PF00076.19^RRM_1^RNA recognition motif. (a.k.a. RRM, RBD, or RNP domain)^304-372^E:9.3e-18
neural	CAPTEDRAFT-158978	2.65e-07	1.20077	0.258	0.049	0.00301056	GLNA2_DROME^GLNA2_DROME^Q:70-1104,H:12-369^66.2%ID^E:6e-180^RecName: Full=Glutamine synthetase 2 cytoplasmic;^Eukaryota; Metazoa; Ecdysozoa; Arthropoda; Hexapoda; Insecta; Pterygota; Neoptera; Endopterygota; Diptera; Brachycera; Muscomorpha; Ephydroidea; Drosophilidae; Drosophila; Sophophora	PF03951.16^Gln-synt_N^Glutamine synthetase, beta-Grasp domain^25-101^E:3.5e-13`PF00120.21^Gln-synt_C^Glutamine synthetase, catalytic domain^185-244^E:5.6e-08
neural	CAPTEDRAFT-225013	4.17e-07	1.20845	0.581	0.23	0.00474413		PF00010.23^HLH^Helix-loop-helix DNA-binding domain^44-78^E:3.6e-06
neural	CAPTEDRAFT-226902	9.75e-07	0.829058	0.258	0.052	0.0110818	SNAA_MOUSE^SNAA_MOUSE^Q:103-876,H:37-295^72.97%ID^E:5e-126^RecName: Full=Alpha-soluble NSF attachment protein;^Eukaryota; Metazoa; Chordata; Craniata; Vertebrata; Euteleostomi; Mammalia; Eutheria; Euarchontoglires; Glires; Rodentia; Sciurognathi; Muroidea; Muridae; Murinae; Mus; Mus	PF14938.3^SNAP^Soluble NSF attachment protein, SNAP^8-285^E:2.2e-112`PF02071.17^NSF^Aromatic-di-Alanine (AdAR) repeat^39-50^E:7.1`PF08238.9^Sel1^Sel1 repeat^49-61^E:8600`PF02071.17^NSF^Aromatic-di-Alanine (AdAR) repeat^52-63^E:130`PF02071.17^NSF^Aromatic-di-Alanine (AdAR) repeat^79-90^E:1.4`PF08238.9^Sel1^Sel1 repeat^83-106^E:24`PF02071.17^NSF^Aromatic-di-Alanine (AdAR) repeat^98-109^E:90`PF02071…
neural	CAPTEDRAFT-170971	1.31e-06	0.927352	0.677	0.318	0.0148866	SC6A5_HUMAN^SC6A5_HUMAN^Q:201-2048,H:164-780^48.56%ID^E:0^RecName: Full=Sodium- and chloride-dependent glycine transporter 2;^Eukaryota; Metazoa; Chordata; Craniata; Vertebrata; Euteleostomi; Mammalia; Eutheria; Euarchontoglires; Primates; Haplorrhini; Catarrhini; Hominidae; Homo	PF00209.15^SNF^Sodium:neurotransmitter symporter family^42-590^E:1.7e-207
neural	CAPTEDRAFT-219677	1.7e-06	0.807041	0.419	0.124	0.0193833		PF05281.8^Secretogranin_V^Neuroendocrine protein 7B2 precursor (Secretogranin V)^78-287^E:1.7e-30
neural	CAPTEDRAFT-149628	4.69e-06	0.761956	0.29	0.069	0.0533814	TSN31_DANRE^TSN31_DANRE^Q:10-702,H:4-212^46.98%ID^E:5e-51^RecName: Full=Tetraspanin-31;^Eukaryota; Metazoa; Chordata; Craniata; Vertebrata; Euteleostomi; Actinopterygii; Neopterygii; Teleostei; Ostariophysi; Cypriniformes; Cyprinidae; Danio	PF00335.17^Tetraspannin^Tetraspanin family^10-218^E:7.4e-22
neural	Syt1	1.3e-05	1.24566	0.387	0.136	0.147987
neural	Syt4	2.11e-05	1.1157	0.387	0.136	0.239496
